# Supplementary material for: Cell-Type-Specific Profiling of the Arabidopsis thaliana Membrane Protein-Encoding Genes
Source: MDPI journal article supplement (doi:10.3390/membranes12090874), 2022-09-10
Supplement: s1 [file s1]

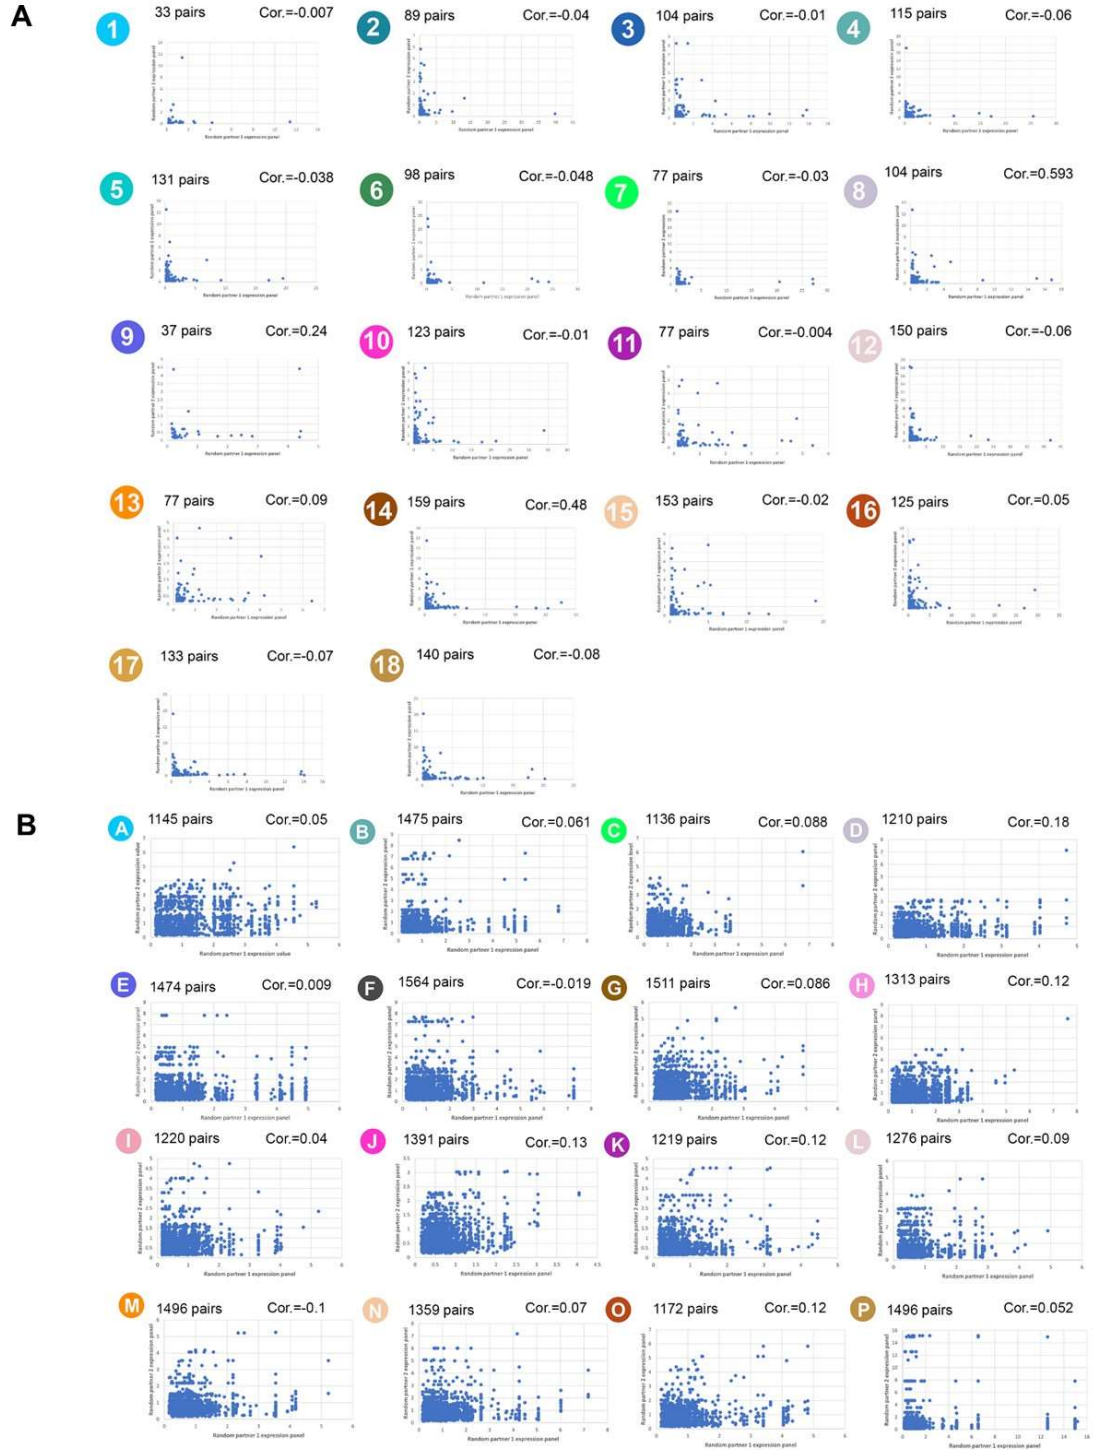

Figure S1. Correlation analysis of the expression of 1,752 pairs of Arabidopsis genes randomly selected. For each protoplast (A, clusters 1 to 18) and nuclei-based cluster (B, clusters A to P), the average numbers of UMIs per protoplast/nuclei of each gene composing the pair are indicated on the x-axis and y-axis. For each cluster, The total number of pairs with both genes expressed is indicated as well as the coefficient of correlation between the expression of the two genes.

**Figure S1: Correlation analysis of the expression of 1752 pairs of Arabidopsis genes randomly selected**

**Table S1.** List of 1,752 Arabidopsis membrane pairs of genes analyzed as the high-confidence interaction of their encoded protein [6] and used in this study to test the co-expression at single-cell level.

| Partner 1 ID | Partner 1 Name | Partner 2 ID | Partner 2 Name |
|--------------|----------------|--------------|----------------|
| AT1G01100    |                | AT5G47700    |                |
| AT1G03860    | ATPHB2         | AT2G20530    | ATPHB6         |
| AT1G03860    | ATPHB2         | AT3G03060    |                |
| AT1G03860    | ATPHB2         | AT5G05370    |                |
| AT1G03860    | ATPHB2         | AT3G27280    | ATPHB4         |
| AT1G03860    | ATPHB2         | AT3G44330    |                |
| AT1G03860    | ATPHB2         | AT3G62360    |                |
| AT1G03860    | ATPHB2         | AT4G12590    |                |
| AT1G03860    | ATPHB2         | AT4G27585    |                |
| AT1G03860    | ATPHB2         | AT4G28510    | ATPHB1         |
| AT1G03860    | ATPHB2         | AT5G25450    |                |
| AT1G03860    | ATPHB2         | AT5G40770    | ATPHB3         |
| AT1G03860    | ATPHB2         | AT5G46800    | BOU            |
| AT1G04280    |                | AT3G03060    |                |
| AT1G04630    | MEE4           | AT1G15210    | ABCG35         |
| AT1G04630    | MEE4           | AT1G16700    |                |
| AT1G04630    | MEE4           | AT1G47260    | APFI           |
| AT1G04630    | MEE4           | AT1G51980    |                |
| AT1G04630    | MEE4           | AT1G63500    |                |
| AT1G04630    | MEE4           | AT1G67350    |                |
| AT1G04630    | MEE4           | AT1G79010    |                |
| AT1G04630    | MEE4           | AT2G07698    |                |
| AT1G04630    | MEE4           | AT2G18730    | ATDGK3         |
| AT1G04630    | MEE4           | AT2G26140    | ftsh4          |
| AT1G04630    | MEE4           | AT2G36850    | ATGSL08        |
| AT1G04630    | MEE4           | AT3G01290    | AtHIR2         |
| AT1G04630    | MEE4           | AT3G02090    | MPPBETA        |
| AT1G04630    | MEE4           | AT3G03100    |                |
| AT1G04630    | MEE4           | AT3G07160    | ATGSL10        |
| AT1G04630    | MEE4           | AT3G18410    |                |
| AT1G04630    | MEE4           | AT3G42050    |                |
| AT1G04630    | MEE4           | AT3G48680    | AtCAL2         |
| AT1G04630    | MEE4           | AT3G51550    | FER            |
| AT1G04630    | MEE4           | AT3G53480    | ABCG37         |
| AT1G04630    | MEE4           | AT4G02580    |                |
| AT1G04630    | MEE4           | AT4G16450    |                |
| AT1G04630    | MEE4           | AT4G32470    |                |
| AT1G04630    | MEE4           | AT5G08060    |                |
| AT1G04630    | MEE4           | AT5G08530    | CI51           |
| AT1G04630    | MEE4           | AT5G11770    |                |
| AT1G04630    | MEE4           | AT5G13450    | ATP5           |
| AT1G04630    | MEE4           | AT5G18800    |                |
| AT1G04630    | MEE4           | AT5G37510    | CI76           |
| AT1G04630    | MEE4           | AT5G52840    |                |
| AT1G04630    | MEE4           | AT5G66510    | GAMMA CA3      |
| AT1G04630    | MEE4           | ATMG00070    | NAD9           |
| AT1G05150    |                | AT3G62830    | ATUXS2         |
| AT1G05150    |                | AT4G00710    | BSK3           |

|           |          |           |           |
|-----------|----------|-----------|-----------|
| AT1G05150 |          | AT4G17140 |           |
| AT1G05150 |          | AT5G40890 | ATCLC-A   |
| AT1G05570 | ATGSL06  | AT3G28720 |           |
| AT1G05570 | ATGSL06  | AT5G40890 | ATCLC-A   |
| AT1G06840 |          | AT1G15210 | ABCG35    |
| AT1G06840 |          | AT3G08580 | AAC1      |
| AT1G06840 |          | AT3G42050 |           |
| AT1G06840 |          | AT3G57330 | ACA11     |
| AT1G06840 |          | AT5G49760 |           |
| AT1G06950 | ATTIC110 | AT1G12110 | ATNRT1    |
| AT1G06950 | ATTIC110 | AT1G18260 | EBS5      |
| AT1G06950 | ATTIC110 | AT1G20330 | CVP1      |
| AT1G06950 | ATTIC110 | AT1G76400 |           |
| AT1G06950 | ATTIC110 | AT2G21160 |           |
| AT1G06950 | ATTIC110 | AT2G30490 | ATC4H     |
| AT1G06950 | ATTIC110 | AT2G40890 | CYP98A3   |
| AT1G06950 | ATTIC110 | AT3G20940 | CYP705A30 |
| AT1G06950 | ATTIC110 | AT3G52190 | AtPHF1    |
| AT1G06950 | ATTIC110 | AT4G00900 | ATECA2    |
| AT1G06950 | ATTIC110 | AT4G14070 | AAE15     |
| AT1G06950 | ATTIC110 | AT5G50460 |           |
| AT1G06950 | ATTIC110 | AT4G29130 | ATHXK1    |
| AT1G06950 | ATTIC110 | AT4G31500 | ATR4      |
| AT1G06950 | ATTIC110 | AT4G35230 | BSK1      |
| AT1G06950 | ATTIC110 | AT4G38350 |           |
| AT1G06950 | ATTIC110 | AT5G18480 | PGSIP6    |
| AT1G06950 | ATTIC110 | AT5G20660 |           |
| AT1G06950 | ATTIC110 | AT5G27540 | emb2473   |
| AT1G06950 | ATTIC110 | AT5G40510 |           |
| AT1G06950 | ATTIC110 | AT5G42570 |           |
| AT1G06950 | ATTIC110 | AT5G42590 | CYP71A16  |
| AT1G06950 | ATTIC110 | AT5G52240 | AtMAPR5   |
| AT1G06950 | ATTIC110 | ATMG00160 | COX2      |
| AT1G07670 | ATECA4   | AT1G15500 | ATNTT2    |
| AT1G07670 | ATECA4   | AT1G53000 | AtCKS     |
| AT1G07670 | ATECA4   | AT1G76400 |           |
| AT1G07670 | ATECA4   | AT2G17720 | P4H5      |
| AT1G07670 | ATECA4   | AT2G45060 |           |
| AT1G07670 | ATECA4   | AT2G45140 | PVA12     |
| AT1G07670 | ATECA4   | AT3G01280 | ATVDAC1   |
| AT1G07670 | ATECA4   | AT3G14680 | CYP72A14  |
| AT1G07670 | ATECA4   | AT3G47833 | SDH7      |
| AT1G07670 | ATECA4   | AT3G54110 | ATPUMP1   |
| AT1G07670 | ATECA4   | AT3G60600 | (AT)VAP   |
| AT1G07670 | ATECA4   | AT4G14070 | AAE15     |
| AT1G07670 | ATECA4   | AT4G21150 | HAP6      |
| AT1G07670 | ATECA4   | AT4G24520 | AR1       |
| AT1G07670 | ATECA4   | AT4G31500 | ATR4      |
| AT1G07670 | ATECA4   | AT5G15090 | ATVDAC3   |
| AT1G07670 | ATECA4   | AT5G57490 | ATVDAC4   |
| AT1G07670 | ATECA4   | AT5G66680 | DGL1      |
| AT1G07810 | ACA3     | AT1G10130 | ATECA3    |

|           |         |           |             |
|-----------|---------|-----------|-------------|
| AT1G07810 | ACA3    | AT1G18260 | EBS5        |
| AT1G07810 | ACA3    | AT1G59870 | ABCG36      |
| AT1G07810 | ACA3    | AT2G36380 | ABCG34      |
| AT1G07810 | ACA3    | AT3G07570 |             |
| AT1G07810 | ACA3    | AT5G50460 |             |
| AT1G07810 | ACA3    | AT5G14040 | PHT3;1      |
| AT1G07810 | ACA3    | AT5G18480 | PGSIP6      |
| AT1G07810 | ACA3    | AT5G27540 | emb2473     |
| AT1G07810 | ACA3    | AT5G52240 | AtMAPR5     |
| AT1G08930 | ERD6    | AT1G18260 | EBS5        |
| AT1G08930 | ERD6    | AT1G55850 | ATCSLE1     |
| AT1G08930 | ERD6    | AT2G01470 | ATSEC12     |
| AT1G08930 | ERD6    | AT3G05970 | ATLACS6     |
| AT1G08930 | ERD6    | AT4G01320 | ATSTE24     |
| AT1G08930 | ERD6    | AT4G26410 |             |
| AT1G08930 | ERD6    | AT5G08080 | ATSYN132    |
| AT1G08930 | ERD6    | AT5G18480 | PGSIP6      |
| AT1G08930 | ERD6    | AT5G25100 |             |
| AT1G08930 | ERD6    | AT5G36220 | CYP81D1     |
| AT1G08930 | ERD6    | AT5G58270 | ABCB25      |
| AT1G10130 | ATECA3  | AT3G05970 | ATLACS6     |
| AT1G10130 | ATECA3  | AT3G07570 |             |
| AT1G10130 | ATECA3  | AT3G27570 |             |
| AT1G10130 | ATECA3  | AT3G57010 |             |
| AT1G10130 | ATECA3  | AT4G29130 | ATHXK1      |
| AT1G10130 | ATECA3  | AT4G35230 | BSK1        |
| AT1G10130 | ATECA3  | AT5G18480 | PGSIP6      |
| AT1G10130 | ATECA3  | AT5G25100 |             |
| AT1G11260 | ATSTP1  | AT1G61250 | SC3         |
| AT1G11680 | CYP51   | AT2G21160 |             |
| AT1G11890 | ATSEC22 | AT1G12110 | ATNRT1      |
| AT1G11890 | ATSEC22 | AT5G12470 |             |
| AT1G11910 | APA1    | AT1G74020 | SS2         |
| AT1G11910 | APA1    | AT4G23430 | AtTic32-IVa |
| AT1G11910 | APA1    | AT5G42650 | AOS         |
| AT1G12110 | ATNRT1  | AT1G55850 | ATCSLE1     |
| AT1G12110 | ATNRT1  | AT1G76400 |             |
| AT1G12110 | ATNRT1  | AT2G19080 |             |
| AT1G12110 | ATNRT1  | AT4G15330 | CYP705A1    |
| AT1G12110 | ATNRT1  | AT5G40510 |             |
| AT1G13060 | PBE1    | AT1G16470 | PAB1        |
| AT1G13060 | PBE1    | AT2G05840 | PAA2        |
| AT1G13060 | PBE1    | AT3G22110 | PAC1        |
| AT1G13060 | PBE1    | AT3G27430 | PBB1        |
| AT1G13060 | PBE1    | AT3G60820 | PBF1        |
| AT1G13060 | PBE1    | AT4G31300 | PBA1        |
| AT1G13060 | PBE1    | AT5G42790 | ARS5        |
| AT1G13060 | PBE1    | AT5G56500 | Cpn60beta3  |
| AT1G13080 | CYP71B2 | AT2G21160 |             |
| AT1G13080 | CYP71B2 | AT2G24180 | CYP71B6     |
| AT1G13080 | CYP71B2 | AT2G30490 | ATC4H       |
| AT1G13080 | CYP71B2 | AT3G13772 | AtTMN7      |

|           |         |           |           |
|-----------|---------|-----------|-----------|
| AT1G13080 | CYP71B2 | AT3G26210 | CYP71B23  |
| AT1G13080 | CYP71B2 | AT3G61070 | PEX11E    |
| AT1G13080 | CYP71B2 | AT4G35000 | APX3      |
| AT1G13080 | CYP71B2 | AT5G12470 |           |
| AT1G14080 | ATFUT6  | AT4G23640 | ATKT3     |
| AT1G14830 | ADL1C   | AT1G59610 | ADL3      |
| AT1G15210 | ABCG35  | AT1G26850 |           |
| AT1G15210 | ABCG35  | AT1G30360 | ERD4      |
| AT1G15210 | ABCG35  | AT1G47260 | APFI      |
| AT1G15210 | ABCG35  | AT1G51980 |           |
| AT1G15210 | ABCG35  | AT1G63500 |           |
| AT1G15210 | ABCG35  | AT1G67350 |           |
| AT1G15210 | ABCG35  | AT1G79010 |           |
| AT1G15210 | ABCG35  | AT2G18730 | ATDGK3    |
| AT1G15210 | ABCG35  | AT2G20360 |           |
| AT1G15210 | ABCG35  | AT2G21410 | VHA-A2    |
| AT1G15210 | ABCG35  | AT2G28520 | VHA-A1    |
| AT1G15210 | ABCG35  | AT3G01290 | AtHIR2    |
| AT1G15210 | ABCG35  | AT3G02090 | MPPBETA   |
| AT1G15210 | ABCG35  | AT3G27240 |           |
| AT1G15210 | ABCG35  | AT3G28710 |           |
| AT1G15210 | ABCG35  | AT3G42050 |           |
| AT1G15210 | ABCG35  | AT3G48680 | AtCAL2    |
| AT1G15210 | ABCG35  | AT3G57330 | ACA11     |
| AT1G15210 | ABCG35  | AT4G29900 | ACA10     |
| AT1G15210 | ABCG35  | AT5G08530 | CI51      |
| AT1G15210 | ABCG35  | AT5G11770 |           |
| AT1G15210 | ABCG35  | AT5G13450 | ATP5      |
| AT1G15210 | ABCG35  | AT5G19760 |           |
| AT1G15210 | ABCG35  | AT5G37510 | CI76      |
| AT1G15210 | ABCG35  | AT5G40810 |           |
| AT1G15210 | ABCG35  | AT5G49760 |           |
| AT1G15210 | ABCG35  | AT5G51570 |           |
| AT1G15210 | ABCG35  | AT5G52840 |           |
| AT1G15210 | ABCG35  | AT5G57110 | ACA8      |
| AT1G15210 | ABCG35  | AT5G64030 |           |
| AT1G15210 | ABCG35  | AT5G66510 | GAMMA CA3 |
| AT1G15210 | ABCG35  | ATMG00070 | NAD9      |
| AT1G15500 | ATNTT2  | AT1G19110 |           |
| AT1G15500 | ATNTT2  | AT1G53000 | AtCKS     |
| AT1G15500 | ATNTT2  | AT1G61790 |           |
| AT1G15500 | ATNTT2  | AT2G17720 | P4H5      |
| AT1G15500 | ATNTT2  | AT2G45140 | PVA12     |
| AT1G15500 | ATNTT2  | AT3G27820 | ATMDAR4   |
| AT1G15500 | ATNTT2  | AT4G21150 | HAP6      |
| AT1G15500 | ATNTT2  | AT5G15090 | ATVDAC3   |
| AT1G15500 | ATNTT2  | AT5G57490 | ATVDAC4   |
| AT1G15690 | ATAVP3  | AT1G59870 | ABCG36    |
| AT1G15690 | ATAVP3  | AT3G57330 | ACA11     |
| AT1G15690 | ATAVP3  | AT4G30190 | AHA2      |
| AT1G15690 | ATAVP3  | AT5G57110 | ACA8      |
| AT1G16470 | PAB1    | AT1G56450 | PBG1      |

|           |               |           |           |
|-----------|---------------|-----------|-----------|
| AT1G16470 | PAB1          | AT4G31300 | PBA1      |
| AT1G16470 | PAB1          | AT5G42790 | ARS5      |
| AT1G16700 |               | AT1G47260 | APFI      |
| AT1G16700 |               | AT1G76030 |           |
| AT1G16700 |               | AT1G79010 |           |
| AT1G16700 |               | AT2G33040 | ATP3      |
| AT1G16700 |               | AT3G01290 | AtHIR2    |
| AT1G16700 |               | AT3G02090 | MPPBETA   |
| AT1G16700 |               | AT3G27280 | ATPHB4    |
| AT1G16700 |               | AT3G48680 | AtCAL2    |
| AT1G16700 |               | AT3G57530 | ATCPK32   |
| AT1G16700 |               | AT4G02580 |           |
| AT1G16700 |               | AT4G16450 |           |
| AT1G16700 |               | AT5G08060 |           |
| AT1G16700 |               | AT5G08530 | CI51      |
| AT1G16700 |               | AT5G11770 |           |
| AT1G16700 |               | AT5G52840 |           |
| AT1G16700 |               | ATMG00070 | NAD9      |
| AT1G18260 | EBS5          | AT1G75220 | AtERDL6   |
| AT1G18260 | EBS5          | AT2G01470 | ATSEC12   |
| AT1G18260 | EBS5          | AT2G40890 | CYP98A3   |
| AT1G18260 | EBS5          | AT3G13772 | AtTMN7    |
| AT1G18260 | EBS5          | AT4G29130 | ATHXK1    |
| AT1G18260 | EBS5          | AT4G35230 | BSK1      |
| AT1G18260 | EBS5          | AT5G07910 |           |
| AT1G18260 | EBS5          | AT5G18480 | PGSIP6    |
| AT1G18260 | EBS5          | AT5G27540 | emb2473   |
| AT1G18260 | EBS5          | AT5G52240 | AtMAPR5   |
| AT1G18540 |               | AT3G18740 | RLK902    |
| AT1G19110 |               | AT1G30360 | ERD4      |
| AT1G19110 |               | AT1G55160 |           |
| AT1G19360 | RRA3          | AT5G23630 | MIA       |
| AT1G19580 | GAMMA CA1     | AT5G66510 | GAMMA CA3 |
| AT1G20010 | TUB5          | AT3G56150 | ATEIF3C-1 |
| AT1G20050 | HYD1          | AT5G16590 | LRR1      |
| AT1G20330 | CVP1          | AT2G30490 | ATC4H     |
| AT1G20330 | CVP1          | AT2G40890 | CYP98A3   |
| AT1G20330 | CVP1          | AT4G29130 | ATHXK1    |
| AT1G20330 | CVP1          | AT5G40510 |           |
| AT1G20575 | DPMS1         | AT3G13772 | AtTMN7    |
| AT1G20575 | DPMS1         | AT3G26210 | CYP71B23  |
| AT1G20575 | DPMS1         | AT5G20660 |           |
| AT1G22410 |               | AT1G33140 | PGY2      |
| AT1G22410 |               | AT3G63150 | ATCBG     |
| AT1G22410 |               | AT4G26010 |           |
| AT1G22530 | PATL2         | AT1G72150 | PATL1     |
| AT1G25490 | ATB BETA BETA | AT5G24710 |           |
| AT1G26850 |               | AT1G30360 | ERD4      |
| AT1G26850 |               | AT1G77590 | LACS9     |
| AT1G26850 |               | AT2G18960 | AHA1      |
| AT1G26850 |               | AT2G20360 |           |
| AT1G26850 |               | AT2G37050 |           |

|           |         |           |          |
|-----------|---------|-----------|----------|
| AT1G26850 |         | AT3G08580 | AAC1     |
| AT1G26850 |         | AT3G16480 | MPPalpha |
| AT1G26850 |         | AT3G27240 |          |
| AT1G26850 |         | AT3G57330 | ACA11    |
| AT1G26850 |         | AT4G38350 |          |
| AT1G26850 |         | AT5G04930 | ALA1     |
| AT1G26850 |         | AT5G16590 | LRR1     |
| AT1G26850 |         | AT5G19760 |          |
| AT1G26850 |         | AT5G40810 |          |
| AT1G26850 |         | AT5G49760 |          |
| AT1G26880 |         | AT1G69620 | RPL34    |
| AT1G27190 |         | AT3G28450 |          |
| AT1G27390 | TOM20-2 | AT1G72170 |          |
| AT1G27390 | TOM20-2 | AT3G07568 |          |
| AT1G27390 | TOM20-2 | AT5G53650 |          |
| AT1G27400 |         | AT3G04400 | emb2171  |
| AT1G27400 |         | AT1G57860 |          |
| AT1G27400 |         | AT1G43170 | ARP1     |
| AT1G27400 |         | AT1G66580 | RPL10C   |
| AT1G27400 |         | AT3G24830 |          |
| AT1G27770 | ACA1    | AT2G04350 | LACS8    |
| AT1G27770 | ACA1    | ATMG00220 | COB      |
| AT1G27770 | ACA1    | AT2G17720 | P4H5     |
| AT1G27770 | ACA1    | AT2G25310 |          |
| AT1G27770 | ACA1    | AT2G47000 | ABCB4    |
| AT1G27770 | ACA1    | AT3G54110 | ATPUMP1  |
| AT1G27770 | ACA1    | AT4G00630 | ATKEA2   |
| AT1G27770 | ACA1    | AT4G21150 | HAP6     |
| AT1G27770 | ACA1    | AT5G11560 |          |
| AT1G27770 | ACA1    | AT5G13490 | AAC2     |
| AT1G27770 | ACA1    | AT5G15090 | ATVDAC3  |
| AT1G27770 | ACA1    | AT5G57490 | ATVDAC4  |
| AT1G27770 | ACA1    | AT5G66680 | DGL1     |
| AT1G27770 | ACA1    | AT5G67500 | ATVDAC2  |
| AT1G27980 | ATDPL1  | AT1G76400 |          |
| AT1G27980 | ATDPL1  | AT2G21160 |          |
| AT1G27980 | ATDPL1  | AT5G50460 |          |
| AT1G27980 | ATDPL1  | AT4G29130 | ATHXK1   |
| AT1G27980 | ATDPL1  | AT5G52240 | AtMAPR5  |
| AT1G28290 | AGP31   | AT1G66580 | RPL10C   |
| AT1G29470 |         | AT5G14950 | ATGMII   |
| AT1G30360 | ERD4    | AT1G36050 |          |
| AT1G30360 | ERD4    | AT1G55160 |          |
| AT1G30360 | ERD4    | AT1G77590 | LACS9    |
| AT1G30360 | ERD4    | AT2G04350 | LACS8    |
| AT1G30360 | ERD4    | AT2G17720 | P4H5     |
| AT1G30360 | ERD4    | AT2G18960 | AHA1     |
| AT1G30360 | ERD4    | AT2G37050 |          |
| AT1G30360 | ERD4    | AT2G47000 | ABCB4    |
| AT1G30360 | ERD4    | AT3G13870 | GOM8     |
| AT1G30360 | ERD4    | AT3G16480 | MPPalpha |
| AT1G30360 | ERD4    | AT3G27240 |          |

|           |         |           |          |
|-----------|---------|-----------|----------|
| AT1G30360 | ERD4    | AT3G54110 | ATPUMP1  |
| AT1G30360 | ERD4    | AT3G57330 | ACA11    |
| AT1G30360 | ERD4    | AT3G62700 | ABCC14   |
| AT1G30360 | ERD4    | AT4G29900 | ACA10    |
| AT1G30360 | ERD4    | AT4G38350 |          |
| AT1G30360 | ERD4    | AT5G16590 | LRR1     |
| AT1G30360 | ERD4    | AT5G19760 |          |
| AT1G30360 | ERD4    | AT5G40810 |          |
| AT1G30360 | ERD4    | AT5G57110 | ACA8     |
| AT1G32400 | TOM2A   | AT1G59870 | ABCG36   |
| AT1G33140 | PGY2    | AT4G26010 |          |
| AT1G33140 | PGY2    | AT5G42080 | ADL1     |
| AT1G33230 |         | AT1G56110 | NOP56    |
| AT1G34130 | STT3B   | AT3G20920 |          |
| AT1G34430 | EMB3003 | AT3G25860 | LTA2     |
| AT1G35620 | ATPDI8  | AT2G17720 | P4H5     |
| AT1G35620 | ATPDI8  | AT2G21160 |          |
| AT1G35620 | ATPDI8  | AT2G45060 |          |
| AT1G35620 | ATPDI8  | AT2G47000 | ABCB4    |
| AT1G35620 | ATPDI8  | AT3G14680 | CYP72A14 |
| AT1G35620 | ATPDI8  | AT3G54110 | ATPUMP1  |
| AT1G35620 | ATPDI8  | AT3G60600 | (AT)VAP  |
| AT1G35620 | ATPDI8  | AT4G24520 | AR1      |
| AT1G35620 | ATPDI8  | AT4G29130 | ATHXK1   |
| AT1G35620 | ATPDI8  | AT5G15090 | ATVDAC3  |
| AT1G35620 | ATPDI8  | AT5G35460 |          |
| AT1G35620 | ATPDI8  | AT5G40510 |          |
| AT1G35620 | ATPDI8  | AT5G42570 |          |
| AT1G35620 | ATPDI8  | AT5G56730 |          |
| AT1G35620 | ATPDI8  | AT5G57490 | ATVDAC4  |
| AT1G36050 |         | AT2G04350 | LACS8    |
| AT1G36050 |         | AT2G18960 | AHA1     |
| AT1G36050 |         | AT3G47833 | SDH7     |
| AT1G36050 |         | AT3G54110 | ATPUMP1  |
| AT1G36050 |         | AT3G62700 | ABCC14   |
| AT1G36050 |         | AT4G12650 |          |
| AT1G36050 |         | AT4G29900 | ACA10    |
| AT1G36050 |         | AT5G11560 |          |
| AT1G36050 |         | AT5G13490 | AAC2     |
| AT1G36050 |         | AT5G19760 |          |
| AT1G43170 | ARP1    | AT3G04400 | emb2171  |
| AT1G43170 | ARP1    | AT2G34480 |          |
| AT1G43170 | ARP1    | AT3G04840 |          |
| AT1G47260 | APFI    | AT1G51980 |          |
| AT1G47260 | APFI    | AT1G63500 |          |
| AT1G47260 | APFI    | AT1G67350 |          |
| AT1G47260 | APFI    | AT1G79010 |          |
| AT1G47260 | APFI    | AT2G07698 |          |
| AT1G47260 | APFI    | AT2G18730 | ATDGK3   |
| AT1G47260 | APFI    | AT2G33040 | ATP3     |
| AT1G47260 | APFI    | AT2G36850 | ATGSL08  |
| AT1G47260 | APFI    | AT3G01290 | AtHIR2   |



|           |      |           |           |
|-----------|------|-----------|-----------|
| AT1G47260 | APFI | AT3G02090 | MPPBETA   |
| AT1G47260 | APFI | AT3G03100 |           |
| AT1G47260 | APFI | AT3G07160 | ATGSL10   |
| AT1G47260 | APFI | AT3G08580 | AAC1      |
| AT1G47260 | APFI | AT3G42050 |           |
| AT1G47260 | APFI | AT3G48680 | AtCAL2    |
| AT1G47260 | APFI | AT3G51550 | FER       |
| AT1G47260 | APFI | AT3G53480 | ABCG37    |
| AT1G47260 | APFI | AT4G16450 |           |
| AT1G47260 | APFI | AT4G32470 |           |
| AT1G47260 | APFI | AT5G08060 |           |
| AT1G47260 | APFI | AT5G08530 | CI51      |
| AT1G47260 | APFI | AT5G11770 |           |
| AT1G47260 | APFI | AT5G13450 | ATP5      |
| AT1G47260 | APFI | AT5G18800 |           |
| AT1G47260 | APFI | AT5G37510 | CI76      |
| AT1G47260 | APFI | AT5G51570 |           |
| AT1G47260 | APFI | AT5G52840 |           |
| AT1G47260 | APFI | AT5G66510 | GAMMA CA3 |
| AT1G47260 | APFI | ATMG00070 | NAD9      |
| AT1G49570 |      | AT5G19780 | TUA5      |
| AT1G51630 |      | AT1G53000 | AtCKS     |
| AT1G51800 | IOS1 | AT3G11730 | ATFP8     |
| AT1G51980 |      | AT1G63500 |           |
| AT1G51980 |      | AT1G67350 |           |
| AT1G51980 |      | AT1G79010 |           |
| AT1G51980 |      | AT2G07698 |           |
| AT1G51980 |      | AT2G18730 | ATDGK3    |
| AT1G51980 |      | AT2G18960 | AHA1      |
| AT1G51980 |      | AT2G20360 |           |
| AT1G51980 |      | AT2G33040 | ATP3      |
| AT1G51980 |      | AT3G01290 | AtHIR2    |
| AT1G51980 |      | AT3G02090 | MPPBETA   |
| AT1G51980 |      | AT3G03100 |           |
| AT1G51980 |      | AT3G08580 | AAC1      |
| AT1G51980 |      | AT3G27240 |           |
| AT1G51980 |      | AT3G28710 |           |
| AT1G51980 |      | AT3G42050 |           |
| AT1G51980 |      | AT3G48680 | AtCAL2    |
| AT1G51980 |      | AT3G57330 | ACA11     |
| AT1G51980 |      | AT4G16450 |           |
| AT1G51980 |      | AT4G20150 |           |
| AT1G51980 |      | AT4G29900 | ACA10     |
| AT1G51980 |      | AT4G32470 |           |
| AT1G51980 |      | AT5G08530 | CI51      |
| AT1G51980 |      | AT5G11770 |           |
| AT1G51980 |      | AT5G13450 | ATP5      |
| AT1G51980 |      | AT5G18800 |           |
| AT1G51980 |      | AT5G19760 |           |
| AT1G51980 |      | AT5G37510 | CI76      |
| AT1G51980 |      | AT5G40810 |           |
| AT1G51980 |      | AT5G49760 |           |

|           |       |           |           |
|-----------|-------|-----------|-----------|
| AT1G51980 |       | AT5G51570 |           |
| AT1G51980 |       | AT5G52840 |           |
| AT1G51980 |       | AT5G57110 | ACA8      |
| AT1G51980 |       | AT5G62740 | ATHIR1    |
| AT1G51980 |       | AT5G66510 | GAMMA CA3 |
| AT1G51980 |       | AT5G67590 | FRO1      |
| AT1G51980 |       | ATMG00070 | NAD9      |
| AT1G52200 |       | AT4G35860 | ATGB2     |
| AT1G52780 |       | AT4G20110 | BP80-3;1  |
| AT1G52780 |       | AT5G04930 | ALA1      |
| AT1G52780 |       | AT5G49760 |           |
| AT1G53000 | AtCKS | AT1G55160 |           |
| AT1G53000 | AtCKS | AT2G04350 | LACS8     |
| AT1G53000 | AtCKS | ATMG00220 | COB       |
| AT1G53000 | AtCKS | AT2G17720 | P4H5      |
| AT1G53000 | AtCKS | AT2G19080 |           |
| AT1G53000 | AtCKS | AT2G45060 |           |
| AT1G53000 | AtCKS | AT2G45140 | PVA12     |
| AT1G53000 | AtCKS | AT2G47000 | ABCB4     |
| AT1G53000 | AtCKS | AT3G05230 |           |
| AT1G53000 | AtCKS | AT3G14680 | CYP72A14  |
| AT1G53000 | AtCKS | AT3G24300 | AMT1;3    |
| AT1G53000 | AtCKS | AT3G47833 | SDH7      |
| AT1G53000 | AtCKS | AT3G54110 | ATPUMP1   |
| AT1G53000 | AtCKS | AT3G60600 | (AT)VAP   |
| AT1G53000 | AtCKS | AT4G12650 |           |
| AT1G53000 | AtCKS | AT4G14070 | AAE15     |
| AT1G53000 | AtCKS | AT4G21150 | HAP6      |
| AT1G53000 | AtCKS | AT4G24520 | AR1       |
| AT1G53000 | AtCKS | AT4G38350 |           |
| AT1G53000 | AtCKS | AT5G05520 |           |
| AT1G53000 | AtCKS | AT5G15090 | ATVDAC3   |
| AT1G53000 | AtCKS | AT5G19760 |           |
| AT1G53000 | AtCKS | AT5G57490 | ATVDAC4   |
| AT1G53000 | AtCKS | AT5G66680 | DGL1      |
| AT1G53750 | RPT1A | AT1G57860 |           |
| AT1G53750 | RPT1A | AT2G20140 | RPT2b     |
| AT1G53750 | RPT1A | AT2G20580 | ATRPN1A   |
| AT1G53750 | RPT1A | AT2G34480 |           |
| AT1G53750 | RPT1A | AT5G45775 |           |
| AT1G53750 | RPT1A | AT3G05530 | ATS6A.2   |
| AT1G53750 | RPT1A | AT5G58290 | RPT3      |
| AT1G55160 |       | AT2G17720 | P4H5      |
| AT1G55160 |       | AT2G37050 |           |
| AT1G55160 |       | AT2G47000 | ABCB4     |
| AT1G55160 |       | AT3G13870 | GOM8      |
| AT1G55160 |       | AT3G54110 | ATPUMP1   |
| AT1G55160 |       | AT3G60330 | AHA7      |
| AT1G55160 |       | AT4G01100 | ADNT1     |
| AT1G55160 |       | AT4G12650 |           |
| AT1G55160 |       | AT4G24330 |           |
| AT1G55160 |       | AT4G35300 | TMT2      |

|           |         |           |            |
|-----------|---------|-----------|------------|
| AT1G55160 |         | AT5G05520 |            |
| AT1G55850 | ATCSLE1 | AT2G01470 | ATSEC12    |
| AT1G55850 | ATCSLE1 | AT2G21160 |            |
| AT1G55850 | ATCSLE1 | AT4G26410 |            |
| AT1G55850 | ATCSLE1 | AT5G09270 |            |
| AT1G55850 | ATCSLE1 | AT5G39410 |            |
| AT1G55850 | ATCSLE1 | AT5G43970 | ATTOM22-V  |
| AT1G55850 | ATCSLE1 | AT5G52240 | AtMAPR5    |
| AT1G56110 | NOP56   | AT5G23630 | MIA        |
| AT1G56110 | NOP56   | AT5G55610 |            |
| AT1G56140 |         | AT5G04930 | ALA1       |
| AT1G56140 |         | AT5G49760 |            |
| AT1G56330 | ATSAR1  | AT2G19860 | ATHXK2     |
| AT1G56450 | PBG1    | AT2G05840 | PAA2       |
| AT1G56450 | PBG1    | AT2G28000 | CH-CPN60A  |
| AT1G56450 | PBG1    | AT2G33210 | HSP60-2    |
| AT1G56450 | PBG1    | AT3G23990 | HSP60      |
| AT1G56450 | PBG1    | AT3G27430 | PBB1       |
| AT1G56450 | PBG1    | AT3G60820 | PBF1       |
| AT1G56450 | PBG1    | AT5G42790 | ARS5       |
| AT1G56450 | PBG1    | AT5G56500 | Cpn60beta3 |
| AT1G57860 |         | AT2G34480 |            |
| AT1G57860 |         | AT5G45775 |            |
| AT1G57860 |         | AT4G27090 |            |
| AT1G57860 |         | AT5G58290 | RPT3       |
| AT1G57860 |         | AT5G64260 | EXL2       |
| AT1G59820 | ALA3    | AT5G13450 | ATP5       |
| AT1G59870 | ABCG36  | AT1G75680 | AtGH9B7    |
| AT1G59870 | ABCG36  | AT2G36380 | ABCG34     |
| AT1G59870 | ABCG36  | AT3G02880 |            |
| AT1G59870 | ABCG36  | AT3G08510 | ATPLC2     |
| AT1G59870 | ABCG36  | AT3G21630 | CERK1      |
| AT1G59870 | ABCG36  | AT5G14040 | PHT3;1     |
| AT1G61250 | SC3     | AT3G07950 |            |
| AT1G61250 | SC3     | AT4G28770 |            |
| AT1G61790 |         | AT2G04350 | LACS8      |
| AT1G61790 |         | ATMG00220 | COB        |
| AT1G61790 |         | AT2G17720 | P4H5       |
| AT1G61790 |         | AT2G18960 | AHA1       |
| AT1G61790 |         | AT2G45140 | PVA12      |
| AT1G61790 |         | AT3G13870 | GOM8       |
| AT1G61790 |         | AT3G14610 | CYP72A7    |
| AT1G61790 |         | AT4G21150 | HAP6       |
| AT1G61790 |         | AT4G29900 | ACA10      |
| AT1G61790 |         | AT5G15090 | ATVDAC3    |
| AT1G61790 |         | AT5G19760 |            |
| AT1G61790 |         | AT5G66680 | DGL1       |
| AT1G63500 |         | AT1G79010 |            |
| AT1G63500 |         | AT2G07698 |            |
| AT1G63500 |         | AT2G20360 |            |
| AT1G63500 |         | AT3G08580 | AAC1       |
| AT1G63500 |         | AT3G27240 |            |

|           |        |           |           |
|-----------|--------|-----------|-----------|
| AT1G63500 |        | AT3G48680 | AtCAL2    |
| AT1G63500 |        | AT3G57330 | ACA11     |
| AT1G63500 |        | AT4G30190 | AHA2      |
| AT1G63500 |        | AT4G32470 |           |
| AT1G63500 |        | AT5G08530 | CI51      |
| AT1G63500 |        | AT5G13450 | ATP5      |
| AT1G63500 |        | AT5G37510 | CI76      |
| AT1G63500 |        | AT5G52840 |           |
| AT1G63500 |        | AT5G66510 | GAMMA CA3 |
| AT1G63500 |        | AT5G67590 | FRO1      |
| AT1G63500 |        | ATMG00070 | NAD9      |
| AT1G64090 | RTNLB3 | AT4G23630 | BTI1      |
| AT1G64090 | RTNLB3 | AT4G35790 | ATPLDELTA |
| AT1G64790 | ILA    | AT4G39850 | ABCD1     |
| AT1G65270 |        | AT5G05370 |           |
| AT1G65270 |        | AT4G12590 |           |
| AT1G65270 |        | AT5G11560 |           |
| AT1G65270 |        | AT5G13490 | AAC2      |
| AT1G65270 |        | AT5G40770 | ATPHB3    |
| AT1G65270 |        | AT5G47890 |           |
| AT1G65270 |        | AT5G48000 | CYP708 A2 |
| AT1G65540 |        | AT3G28860 | ABCB19    |
| AT1G65985 |        | AT2G21580 |           |
| AT1G66580 | RPL10C | AT3G04840 |           |
| AT1G67350 |        | AT1G79010 |           |
| AT1G67350 |        | AT2G07698 |           |
| AT1G67350 |        | ATMG00480 | ATP8      |
| AT1G67350 |        | AT2G20360 |           |
| AT1G67350 |        | AT3G03100 |           |
| AT1G67350 |        | AT3G07160 | ATGSL10   |
| AT1G67350 |        | AT3G08580 | AAC1      |
| AT1G67350 |        | AT3G18480 | AtCASP    |
| AT1G67350 |        | AT3G27240 |           |
| AT1G67350 |        | AT3G48680 | AtCAL2    |
| AT1G67350 |        | AT4G16450 |           |
| AT1G67350 |        | AT4G20150 |           |
| AT1G67350 |        | AT4G32470 |           |
| AT1G67350 |        | AT5G08530 | CI51      |
| AT1G67350 |        | AT5G13450 | ATP5      |
| AT1G67350 |        | AT5G37510 | CI76      |
| AT1G67350 |        | AT5G52840 |           |
| AT1G67350 |        | AT5G66510 | GAMMA CA3 |
| AT1G67350 |        | ATMG00070 | NAD9      |
| AT1G67730 | ATKCR1 | AT5G01500 | TAAC      |
| AT1G68070 |        | AT5G13490 | AAC2      |
| AT1G69460 |        | AT5G01500 | TAAC      |
| AT1G69620 | RPL34  | AT3G28900 |           |
| AT1G69620 | RPL34  | AT3G53740 |           |
| AT1G69620 | RPL34  | AT3G55750 |           |
| AT1G70690 | HWI1   | AT1G75680 | AtGH9B7   |
| AT1G70690 | HWI1   | AT5G07910 |           |
| AT1G72150 | PATL1  | AT4G37070 | AtPLAIVA  |

|           |         |           |           |
|-----------|---------|-----------|-----------|
| AT1G72170 |         | AT3G07568 |           |
| AT1G72170 |         | AT5G21990 | OEP61     |
| AT1G74020 | SS2     | AT5G42150 |           |
| AT1G74020 | SS2     | AT5G58070 | ATTIL     |
| AT1G75220 | AtERDL6 | AT3G28450 |           |
| AT1G75220 | AtERDL6 | AT4G35230 | BSK1      |
| AT1G75220 | AtERDL6 | AT5G07910 |           |
| AT1G75220 | AtERDL6 | AT5G18480 | PGSIP6    |
| AT1G76030 |         | AT4G38510 |           |
| AT1G76400 |         | AT2G01720 |           |
| AT1G76400 |         | AT2G30490 | ATC4H     |
| AT1G76400 |         | AT2G45060 |           |
| AT1G76400 |         | AT3G01280 | ATVDAC1   |
| AT1G76400 |         | AT3G14680 | CYP72A14  |
| AT1G76400 |         | AT3G20940 | CYP705A30 |
| AT1G76400 |         | AT3G26330 | CYP71B37  |
| AT1G76400 |         | AT3G47833 | SDH7      |
| AT1G76400 |         | AT3G60600 | (AT)VAP   |
| AT1G76400 |         | AT3G66658 | ALDH22A1  |
| AT1G76400 |         | AT4G14070 | AAE15     |
| AT1G76400 |         | AT4G24520 | AR1       |
| AT1G76400 |         | AT4G31500 | ATR4      |
| AT1G76400 |         | AT4G35230 | BSK1      |
| AT1G76400 |         | AT4G37640 | ACA2      |
| AT1G76400 |         | AT4G38350 |           |
| AT1G76400 |         | AT5G27540 | emb2473   |
| AT1G76400 |         | AT5G40510 |           |
| AT1G76400 |         | AT5G42590 | CYP71A16  |
| AT1G79010 |         | AT2G07698 |           |
| AT1G79010 |         | AT2G18730 | ATDGK3    |
| AT1G79010 |         | AT2G33040 | ATP3      |
| AT1G79010 |         | AT3G01290 | AtHIR2    |
| AT1G79010 |         | AT3G02090 | MPPBETA   |
| AT1G79010 |         | AT3G03100 |           |
| AT1G79010 |         | AT3G08580 | AAC1      |
| AT1G79010 |         | AT3G42050 |           |
| AT1G79010 |         | AT3G48680 | AtCAL2    |
| AT1G79010 |         | AT3G53480 | ABCG37    |
| AT1G79010 |         | AT4G16450 |           |
| AT1G79010 |         | AT4G20150 |           |
| AT1G79010 |         | AT4G29900 | ACA10     |
| AT1G79010 |         | AT4G32470 |           |
| AT1G79010 |         | AT5G08530 | CI51      |
| AT1G79010 |         | AT5G11770 |           |
| AT1G79010 |         | AT5G13450 | ATP5      |
| AT1G79010 |         | AT5G37510 | CI76      |
| AT1G79010 |         | AT5G51570 |           |
| AT1G79010 |         | AT5G52840 |           |
| AT1G79010 |         | AT5G66510 | GAMMA CA3 |
| AT1G79010 |         | ATMG00070 | NAD9      |
| AT2G01470 | ATSEC12 | AT2G24180 | CYP71B6   |
| AT2G01470 | ATSEC12 | AT2G30490 | ATC4H     |

|           |         |           |            |
|-----------|---------|-----------|------------|
| AT2G01470 | ATSEC12 | AT2G40890 | CYP98A3    |
| AT2G01470 | ATSEC12 | AT3G05970 | ATLACS6    |
| AT2G01470 | ATSEC12 | AT3G13772 | AtTMN7     |
| AT2G01470 | ATSEC12 | AT3G27570 |            |
| AT2G01470 | ATSEC12 | AT3G28450 |            |
| AT2G01470 | ATSEC12 | AT3G52190 | AtPHF1     |
| AT2G01470 | ATSEC12 | AT4G01320 | ATSTE24    |
| AT2G01470 | ATSEC12 | AT4G26410 |            |
| AT2G01470 | ATSEC12 | AT5G12470 |            |
| AT2G01470 | ATSEC12 | AT5G39410 |            |
| AT2G01690 |         | AT3G02080 |            |
| AT2G01720 |         | AT3G60600 | (AT)VAP    |
| AT2G01720 |         | AT4G31500 | ATR4       |
| AT2G03510 |         | AT2G43950 | ATOEP37    |
| AT2G03510 |         | AT3G18410 |            |
| AT2G03510 |         | AT3G62360 |            |
| AT2G03510 |         | AT3G62830 | ATUXS2     |
| AT2G03510 |         | AT4G17140 |            |
| AT2G03510 |         | AT4G28510 | ATPHB1     |
| AT2G03510 |         | AT5G05000 | ATTOC34    |
| AT2G03510 |         | AT5G23630 | MIA        |
| AT2G03510 |         | AT5G40480 | EMB3012    |
| AT2G04350 | LACS8   | ATMG00220 | COB        |
| AT2G04350 | LACS8   | AT2G17720 | P4H5       |
| AT2G04350 | LACS8   | AT2G18960 | AHA1       |
| AT2G04350 | LACS8   | AT2G47000 | ABCB4      |
| AT2G04350 | LACS8   | AT3G14610 | CYP72A7    |
| AT2G04350 | LACS8   | AT3G17910 | EMB3121    |
| AT2G04350 | LACS8   | AT3G24300 | AMT1;3     |
| AT2G04350 | LACS8   | AT3G47833 | SDH7       |
| AT2G04350 | LACS8   | AT3G54110 | ATPUMP1    |
| AT2G04350 | LACS8   | AT3G60600 | (AT)VAP    |
| AT2G04350 | LACS8   | AT3G62700 | ABCC14     |
| AT2G04350 | LACS8   | AT4G21150 | HAP6       |
| AT2G04350 | LACS8   | AT4G24520 | AR1        |
| AT2G04350 | LACS8   | AT4G37640 | ACA2       |
| AT2G04350 | LACS8   | AT5G10780 |            |
| AT2G04350 | LACS8   | AT5G11560 |            |
| AT2G04350 | LACS8   | AT5G13490 | AAC2       |
| AT2G04350 | LACS8   | AT5G14950 | ATGMII     |
| AT2G04350 | LACS8   | AT5G15090 | ATVDAC3    |
| AT2G04350 | LACS8   | AT5G19760 |            |
| AT2G04350 | LACS8   | AT5G66680 | DGL1       |
| AT2G04350 | LACS8   | AT5G67500 | ATVDAC2    |
| AT2G05840 | PAA2    | AT2G28000 | CH-CPN60A  |
| AT2G05840 | PAA2    | AT2G33210 | HSP60-2    |
| AT2G05840 | PAA2    | AT3G23990 | HSP60      |
| AT2G05840 | PAA2    | AT3G27430 | PBB1       |
| AT2G05840 | PAA2    | AT3G60820 | PBF1       |
| AT2G05840 | PAA2    | AT4G31300 | PBA1       |
| AT2G05840 | PAA2    | AT5G42790 | ARS5       |
| AT2G05840 | PAA2    | AT5G56500 | Cpn60beta3 |

|           |        |           |           |
|-----------|--------|-----------|-----------|
| AT2G07698 |        | AT2G33040 | ATP3      |
| AT2G07698 |        | AT3G01290 | AtHIR2    |
| AT2G07698 |        | AT3G02090 | MPPBETA   |
| AT2G07698 |        | AT3G03100 |           |
| AT2G07698 |        | AT3G08580 | AAC1      |
| AT2G07698 |        | AT3G42050 |           |
| AT2G07698 |        | AT3G48680 | AtCAL2    |
| AT2G07698 |        | AT3G53480 | ABCG37    |
| AT2G07698 |        | AT4G16450 |           |
| AT2G07698 |        | AT4G32410 | AtCESA1   |
| AT2G07698 |        | AT4G32470 |           |
| AT2G07698 |        | AT5G08060 |           |
| AT2G07698 |        | AT5G08530 | CI51      |
| AT2G07698 |        | AT5G11770 |           |
| AT2G07698 |        | AT5G13450 | ATP5      |
| AT2G07698 |        | AT5G18800 |           |
| AT2G07698 |        | AT5G37510 | CI76      |
| AT2G07698 |        | AT5G51570 |           |
| AT2G07698 |        | AT5G52840 |           |
| AT2G07698 |        | AT5G66510 | GAMMA CA3 |
| AT2G07698 |        | ATMG00070 | NAD9      |
| AT2G14740 | ATVSR3 | AT3G52850 | ATELP     |
| AT2G17440 | PIRL5  | AT5G51570 |           |
| AT2G17720 | P4H5   | AT2G18960 | AHA1      |
| AT2G17720 | P4H5   | AT2G45060 |           |
| AT2G17720 | P4H5   | AT2G45140 | PVA12     |
| AT2G17720 | P4H5   | AT2G47000 | ABCB4     |
| AT2G17720 | P4H5   | AT3G01280 | ATVDAC1   |
| AT2G17720 | P4H5   | AT3G05230 |           |
| AT2G17720 | P4H5   | AT3G13870 | GOM8      |
| AT2G17720 | P4H5   | AT3G14680 | CYP72A14  |
| AT2G17720 | P4H5   | AT3G47833 | SDH7      |
| AT2G17720 | P4H5   | AT3G54110 | ATPUMP1   |
| AT2G17720 | P4H5   | AT3G60600 | (AT)VAP   |
| AT2G17720 | P4H5   | AT4G14070 | AAE15     |
| AT2G17720 | P4H5   | AT4G21150 | HAP6      |
| AT2G17720 | P4H5   | AT4G24520 | AR1       |
| AT2G17720 | P4H5   | AT4G29900 | ACA10     |
| AT2G17720 | P4H5   | AT4G38350 |           |
| AT2G17720 | P4H5   | AT5G15090 | ATVDAC3   |
| AT2G17720 | P4H5   | AT5G19760 |           |
| AT2G17720 | P4H5   | AT5G35460 |           |
| AT2G17720 | P4H5   | AT5G42570 |           |
| AT2G17720 | P4H5   | AT5G56730 |           |
| AT2G17720 | P4H5   | AT5G57490 | ATVDAC4   |
| AT2G17720 | P4H5   | AT5G61790 | ATCNX1    |
| AT2G17720 | P4H5   | AT5G66680 | DGL1      |
| AT2G17720 | P4H5   | AT5G67500 | ATVDAC2   |
| AT2G18730 | ATDGK3 | AT3G01290 | AtHIR2    |
| AT2G18730 | ATDGK3 | AT3G02090 | MPPBETA   |
| AT2G18730 | ATDGK3 | AT3G08580 | AAC1      |
| AT2G18730 | ATDGK3 | AT3G48680 | AtCAL2    |

|           |        |           |           |
|-----------|--------|-----------|-----------|
| AT2G18730 | ATDGK3 | AT4G29900 | ACA10     |
| AT2G18730 | ATDGK3 | AT5G08530 | CI51      |
| AT2G18730 | ATDGK3 | AT5G11770 |           |
| AT2G18730 | ATDGK3 | AT5G51570 |           |
| AT2G18730 | ATDGK3 | AT5G52840 |           |
| AT2G18730 | ATDGK3 | AT5G66510 | GAMMA CA3 |
| AT2G18730 | ATDGK3 | ATMG00070 | NAD9      |
| AT2G18960 | AHA1   | ATMG00220 | COB       |
| AT2G18960 | AHA1   | AT2G20360 |           |
| AT2G18960 | AHA1   | AT2G21410 | VHA-A2    |
| AT2G18960 | AHA1   | AT2G25310 |           |
| AT2G18960 | AHA1   | AT2G47000 | ABCB4     |
| AT2G18960 | AHA1   | AT3G01290 | AtHIR2    |
| AT2G18960 | AHA1   | AT3G08580 | AAC1      |
| AT2G18960 | AHA1   | AT3G16480 | MPPalpha  |
| AT2G18960 | AHA1   | AT3G24300 | AMT1;3    |
| AT2G18960 | AHA1   | AT3G27240 |           |
| AT2G18960 | AHA1   | AT3G28710 |           |
| AT2G18960 | AHA1   | AT3G47833 | SDH7      |
| AT2G18960 | AHA1   | AT3G48680 | AtCAL2    |
| AT2G18960 | AHA1   | AT3G54110 | ATPUMP1   |
| AT2G18960 | AHA1   | AT3G57330 | ACA11     |
| AT2G18960 | AHA1   | AT3G62700 | ABCC14    |
| AT2G18960 | AHA1   | AT4G29900 | ACA10     |
| AT2G18960 | AHA1   | AT4G30190 | AHA2      |
| AT2G18960 | AHA1   | AT4G38350 |           |
| AT2G18960 | AHA1   | AT5G13490 | AAC2      |
| AT2G18960 | AHA1   | AT5G14950 | ATGMII    |
| AT2G18960 | AHA1   | AT5G19760 |           |
| AT2G18960 | AHA1   | AT5G40810 |           |
| AT2G18960 | AHA1   | AT5G51570 |           |
| AT2G18960 | AHA1   | AT5G57110 | ACA8      |
| AT2G18960 | AHA1   | ATMG00070 | NAD9      |
| AT2G19080 |        | AT3G14680 | CYP72A14  |
| AT2G19080 |        | AT4G14070 | AAE15     |
| AT2G19680 |        | AT4G26210 |           |
| AT2G19680 |        | AT4G29480 |           |
| AT2G19860 | ATHXK2 | AT2G21160 |           |
| AT2G19860 | ATHXK2 | AT2G46650 | ATCB5-C   |
| AT2G19860 | ATHXK2 | AT3G13772 | AtTMN7    |
| AT2G19860 | ATHXK2 | AT4G00900 | ATECA2    |
| AT2G19860 | ATHXK2 | AT4G29130 | ATHXK1    |
| AT2G19860 | ATHXK2 | AT5G27540 | emb2473   |
| AT2G19860 | ATHXK2 | ATMG00160 | COX2      |
| AT2G20140 | RPT2b  | AT2G20580 | ATRPN1A   |
| AT2G20140 | RPT2b  | AT2G34480 |           |
| AT2G20140 | RPT2b  | AT3G05530 | ATS6A.2   |
| AT2G20140 | RPT2b  | AT5G58290 | RPT3      |
| AT2G20360 |        | AT2G33040 | ATP3      |
| AT2G20360 |        | AT3G01290 | AtHIR2    |
| AT2G20360 |        | AT3G08580 | AAC1      |
| AT2G20360 |        | AT3G16480 | MPPalpha  |



|           |         |           |           |
|-----------|---------|-----------|-----------|
| AT2G20360 |         | AT3G27240 |           |
| AT2G20360 |         | AT3G28710 |           |
| AT2G20360 |         | AT3G48680 | AtCAL2    |
| AT2G20360 |         | AT3G57330 | ACA11     |
| AT2G20360 |         | AT4G29900 | ACA10     |
| AT2G20360 |         | AT5G08530 | CI51      |
| AT2G20360 |         | AT5G16590 | LRR1      |
| AT2G20360 |         | AT5G19760 |           |
| AT2G20360 |         | AT5G37510 | CI76      |
| AT2G20360 |         | AT5G40810 |           |
| AT2G20360 |         | AT5G49760 |           |
| AT2G20360 |         | AT5G51570 |           |
| AT2G20360 |         | AT5G57110 | ACA8      |
| AT2G20360 |         | AT5G62740 | ATHIR1    |
| AT2G20360 |         | AT5G64030 |           |
| AT2G20360 |         | AT5G66510 | GAMMA CA3 |
| AT2G20360 |         | AT5G67590 | FRO1      |
| AT2G20360 |         | ATMG00070 | NAD9      |
| AT2G20530 | ATPHB6  | AT3G02090 | MPPBETA   |
| AT2G20530 | ATPHB6  | AT3G27280 | ATPHB4    |
| AT2G20530 | ATPHB6  | AT5G11770 |           |
| AT2G20530 | ATPHB6  | AT5G40770 | ATPHB3    |
| AT2G20530 | ATPHB6  | ATMG00270 | NAD6      |
| AT2G20580 | ATRPN1A | AT2G34480 |           |
| AT2G20580 | ATRPN1A | AT3G05530 | ATS6A.2   |
| AT2G20580 | ATRPN1A | AT5G58290 | RPT3      |
| AT2G20760 |         | AT3G08530 |           |
| AT2G20760 |         | AT4G39200 |           |
| AT2G20990 | ATSYTA  | AT2G33040 | ATP3      |
| AT2G20990 | ATSYTA  | AT2G38670 | PECT1     |
| AT2G20990 | ATSYTA  | AT3G02090 | MPPBETA   |
| AT2G20990 | ATSYTA  | AT5G05370 |           |
| AT2G20990 | ATSYTA  | AT3G44330 |           |
| AT2G20990 | ATSYTA  | AT3G57650 | LPAT2     |
| AT2G20990 | ATSYTA  | AT4G12590 |           |
| AT2G20990 | ATSYTA  | AT4G29900 | ACA10     |
| AT2G21160 |         | AT2G30490 | ATC4H     |
| AT2G21160 |         | AT2G40890 | CYP98A3   |
| AT2G21160 |         | AT3G13772 | AtTMN7    |
| AT2G21160 |         | AT3G14680 | CYP72A14  |
| AT2G21160 |         | AT3G61070 | PEX11E    |
| AT2G21160 |         | AT4G29130 | ATHXK1    |
| AT2G21160 |         | AT5G12470 |           |
| AT2G21160 |         | AT5G14030 |           |
| AT2G21160 |         | AT5G20660 |           |
| AT2G21160 |         | AT5G42570 |           |
| AT2G21390 |         | AT4G31490 |           |
| AT2G21410 | VHA-A2  | AT3G01290 | AtHIR2    |
| AT2G21410 | VHA-A2  | AT3G28710 |           |
| AT2G21410 | VHA-A2  | AT3G57330 | ACA11     |
| AT2G21410 | VHA-A2  | AT3G62700 | ABCC14    |
| AT2G21410 | VHA-A2  | AT4G30190 | AHA2      |

|           |           |           |            |
|-----------|-----------|-----------|------------|
| AT2G21410 | VHA-A2    | AT5G40810 |            |
| AT2G21410 | VHA-A2    | AT5G51570 |            |
| AT2G21410 | VHA-A2    | AT5G57110 | ACA8       |
| AT2G21410 | VHA-A2    | ATMG00070 | NAD9       |
| AT2G23770 |           | AT4G16450 |            |
| AT2G23810 | TET8      | AT2G39420 |            |
| AT2G23810 | TET8      | AT5G06320 | NHL3       |
| AT2G23810 | TET8      | AT5G54440 | AtTRS130   |
| AT2G24180 | CYP71B6   | AT4G01320 | ATSTE24    |
| AT2G24180 | CYP71B6   | AT5G23300 | PYRD       |
| AT2G24180 | CYP71B6   | AT5G39410 |            |
| AT2G25160 | CYP82F1   | AT2G35720 | OWL1       |
| AT2G25160 | CYP82F1   | AT5G05000 | ATTOC34    |
| AT2G25310 |           | AT4G38920 | ATVHA-C3   |
| AT2G25310 |           | AT3G03060 |            |
| AT2G25310 |           | AT5G05370 |            |
| AT2G25310 |           | AT5G11560 |            |
| AT2G25310 |           | AT5G13490 | AAC2       |
| AT2G25310 |           | AT5G14950 | ATGMII     |
| AT2G25310 |           | AT5G50650 |            |
| AT2G25310 |           | AT5G55940 | emb2731    |
| AT2G25310 |           | AT5G66680 | DGL1       |
| AT2G25310 |           | AT5G67500 | ATVDAC2    |
| AT2G25430 |           | AT2G40060 | CLC2       |
| AT2G25430 |           | AT4G32285 |            |
| AT2G26140 | ftsh4     | AT3G03100 |            |
| AT2G26140 | ftsh4     | AT3G07160 | ATGSL10    |
| AT2G26140 | ftsh4     | AT3G51550 | FER        |
| AT2G26140 | ftsh4     | AT4G02580 |            |
| AT2G26140 | ftsh4     | AT4G16450 |            |
| AT2G26140 | ftsh4     | AT4G33430 | ATBAK1     |
| AT2G26140 | ftsh4     | AT5G08060 |            |
| AT2G26140 | ftsh4     | AT5G11770 |            |
| AT2G26140 | ftsh4     | AT5G52840 |            |
| AT2G26890 | GRV2      | AT3G11730 | ATFP8      |
| AT2G28000 | CH-CPN60A | AT2G33210 | HSP60-2    |
| AT2G28000 | CH-CPN60A | AT3G23990 | HSP60      |
| AT2G28000 | CH-CPN60A | AT3G60820 | PBF1       |
| AT2G28000 | CH-CPN60A | AT5G42790 | ARS5       |
| AT2G28000 | CH-CPN60A | AT5G56500 | Cpn60beta3 |
| AT2G28430 |           | AT3G07568 |            |
| AT2G28520 | VHA-A1    | AT5G08530 | CI51       |
| AT2G28520 | VHA-A1    | AT5G37510 | CI76       |
| AT2G28520 | VHA-A1    | ATMG00070 | NAD9       |
| AT2G30490 | ATC4H     | AT2G40890 | CYP98A3    |
| AT2G30490 | ATC4H     | AT3G13772 | AtTMN7     |
| AT2G30490 | ATC4H     | AT3G20940 | CYP705A30  |
| AT2G30490 | ATC4H     | AT3G26210 | CYP71B23   |
| AT2G30490 | ATC4H     | AT3G52190 | AtPHF1     |
| AT2G30490 | ATC4H     | AT4G29130 | ATHXK1     |
| AT2G30490 | ATC4H     | AT4G31500 | ATR4       |
| AT2G30490 | ATC4H     | AT5G20660 |            |

|           |           |           |            |
|-----------|-----------|-----------|------------|
| AT2G30490 | ATC4H     | AT5G42570 |            |
| AT2G31610 |           | AT3G02560 |            |
| AT2G31610 |           | AT3G14840 |            |
| AT2G31610 |           | AT5G45750 | AtRABA1c   |
| AT2G32720 | ATCB5-B   | AT4G39690 |            |
| AT2G33040 | ATP3      | AT2G36850 | ATGSL08    |
| AT2G33040 | ATP3      | AT3G02090 | MPPBETA    |
| AT2G33040 | ATP3      | AT3G08580 | AAC1       |
| AT2G33040 | ATP3      | AT3G28710 |            |
| AT2G33040 | ATP3      | AT3G42050 |            |
| AT2G33040 | ATP3      | AT3G48680 | AtCAL2     |
| AT2G33040 | ATP3      | AT4G32470 |            |
| AT2G33040 | ATP3      | AT5G08530 | CI51       |
| AT2G33040 | ATP3      | AT5G11560 |            |
| AT2G33040 | ATP3      | AT5G40770 | ATPHB3     |
| AT2G33040 | ATP3      | AT5G62740 | ATHIR1     |
| AT2G33040 | ATP3      | AT5G66510 | GAMMA CA3  |
| AT2G33040 | ATP3      | ATMG00070 | NAD9       |
| AT2G33120 | ATVAMP722 | AT3G52850 | ATELP      |
| AT2G33120 | ATVAMP722 | AT5G22360 | ATVAMP714  |
| AT2G33210 | HSP60-2   | AT3G23990 | HSP60      |
| AT2G33210 | HSP60-2   | AT3G60820 | PBF1       |
| AT2G33210 | HSP60-2   | AT5G56500 | Cpn60beta3 |
| AT2G33630 |           | AT5G05000 | ATTOC34    |
| AT2G33630 |           | AT5G47420 |            |
| AT2G34250 |           | AT4G21150 | HAP6       |
| AT2G34250 |           | AT5G11560 |            |
| AT2G34250 |           | AT5G66680 | DGL1       |
| AT2G34480 |           | AT3G04400 | emb2171    |
| AT2G34480 |           | AT5G45775 |            |
| AT2G34480 |           | AT3G04840 |            |
| AT2G34480 |           | AT4G27090 |            |
| AT2G34660 | ABCC2     | AT3G27280 | ATPHB4     |
| AT2G34660 | ABCC2     | AT3G57650 | LPAT2      |
| AT2G36380 | ABCG34    | AT3G08510 | ATPLC2     |
| AT2G36380 | ABCG34    | AT4G36750 |            |
| AT2G36380 | ABCG34    | AT5G14040 | PHT3;1     |
| AT2G36850 | ATGSL08   | AT3G42050 |            |
| AT2G36850 | ATGSL08   | AT3G51550 | FER        |
| AT2G36850 | ATGSL08   | AT4G16450 |            |
| AT2G36850 | ATGSL08   | AT5G08060 |            |
| AT2G36850 | ATGSL08   | AT5G08530 | CI51       |
| AT2G36850 | ATGSL08   | AT5G11770 |            |
| AT2G36850 | ATGSL08   | AT5G52840 |            |
| AT2G36850 | ATGSL08   | AT5G66510 | GAMMA CA3  |
| AT2G37050 |           | AT2G47000 | ABCB4      |
| AT2G37050 |           | AT3G54110 | ATPUMP1    |
| AT2G37050 |           | AT3G60330 | AHA7       |
| AT2G37050 |           | AT4G12650 |            |
| AT2G37050 |           | AT4G35300 | TMT2       |
| AT2G37050 |           | AT4G38350 |            |
| AT2G37050 |           | AT5G16590 | LRR1       |

|           |           |           |          |
|-----------|-----------|-----------|----------|
| AT2G37050 |           | AT5G19760 |          |
| AT2G38670 | PECT1     | AT4G03560 | ATCCH1   |
| AT2G38670 | PECT1     | AT5G11560 |          |
| AT2G39420 |           | AT5G06320 | NHL3     |
| AT2G40060 | CLC2      | AT3G11130 |          |
| AT2G40890 | CYP98A3   | AT3G07570 |          |
| AT2G40890 | CYP98A3   | AT3G13772 | AtTMN7   |
| AT2G40890 | CYP98A3   | AT3G26210 | CYP71B23 |
| AT2G40890 | CYP98A3   | AT3G28450 |          |
| AT2G40890 | CYP98A3   | AT3G52190 | AtPHF1   |
| AT2G40890 | CYP98A3   | AT4G00900 | ATECA2   |
| AT2G40890 | CYP98A3   | AT4G01320 | ATSTE24  |
| AT2G40890 | CYP98A3   | AT4G29130 | ATHXK1   |
| AT2G40890 | CYP98A3   | AT4G29330 | DER1     |
| AT2G40890 | CYP98A3   | AT4G31500 | ATR4     |
| AT2G40890 | CYP98A3   | AT4G35230 | BSK1     |
| AT2G40890 | CYP98A3   | AT5G07910 |          |
| AT2G40890 | CYP98A3   | AT5G18480 | PGSIP6   |
| AT2G40890 | CYP98A3   | AT5G20660 |          |
| AT2G40890 | CYP98A3   | AT5G25100 |          |
| AT2G40890 | CYP98A3   | AT5G27540 | emb2473  |
| AT2G40890 | CYP98A3   | AT5G58270 | ABCB25   |
| AT2G40890 | CYP98A3   | ATMG00160 | COX2     |
| AT2G42210 | ATOEP16-3 | AT5G47570 |          |
| AT2G43950 | ATOEP37   | AT3G55360 | ATTSC13  |
| AT2G43950 | ATOEP37   | AT3G62360 |          |
| AT2G43950 | ATOEP37   | AT4G28510 | ATPHB1   |
| AT2G43950 | ATOEP37   | AT5G40480 | EMB3012  |
| AT2G43950 | ATOEP37   | AT5G42960 |          |
| AT2G44640 |           | AT5G58270 | ABCB25   |
| AT2G45010 |           | AT3G52400 | ATSYP122 |
| AT2G45060 |           | AT2G47000 | ABCB4    |
| AT2G45060 |           | AT3G01280 | ATVDAC1  |
| AT2G45060 |           | AT3G14680 | CYP72A14 |
| AT2G45060 |           | AT3G47833 | SDH7     |
| AT2G45060 |           | AT3G54110 | ATPUMP1  |
| AT2G45060 |           | AT3G60600 | (AT)VAP  |
| AT2G45060 |           | AT4G24520 | AR1      |
| AT2G45060 |           | AT5G15090 | ATVDAC3  |
| AT2G45060 |           | AT5G40510 |          |
| AT2G45060 |           | AT5G42570 |          |
| AT2G45060 |           | AT5G57490 | ATVDAC4  |
| AT2G45140 | PVA12     | AT2G47000 | ABCB4    |
| AT2G45140 | PVA12     | AT3G14680 | CYP72A14 |
| AT2G45140 | PVA12     | AT3G47833 | SDH7     |
| AT2G45140 | PVA12     | AT3G54110 | ATPUMP1  |
| AT2G45140 | PVA12     | AT3G66658 | ALDH22A1 |
| AT2G45140 | PVA12     | AT4G14070 | AAE15    |
| AT2G45140 | PVA12     | AT4G21150 | HAP6     |
| AT2G45140 | PVA12     | AT4G24520 | AR1      |
| AT2G45140 | PVA12     | AT5G15090 | ATVDAC3  |
| AT2G45140 | PVA12     | AT5G57490 | ATVDAC4  |

|           |          |           |          |
|-----------|----------|-----------|----------|
| AT2G45510 | CYP704A2 | AT3G48410 |          |
| AT2G46650 | ATCB5-C  | AT4G00900 | ATECA2   |
| AT2G46650 | ATCB5-C  | ATMG00160 | COX2     |
| AT2G47000 | ABCB4    | AT3G13870 | GOM8     |
| AT2G47000 | ABCB4    | AT3G47833 | SDH7     |
| AT2G47000 | ABCB4    | AT3G54110 | ATPUMP1  |
| AT2G47000 | ABCB4    | AT3G60330 | AHA7     |
| AT2G47000 | ABCB4    | AT4G12650 |          |
| AT2G47000 | ABCB4    | AT4G21150 | HAP6     |
| AT2G47000 | ABCB4    | AT4G24520 | AR1      |
| AT2G47000 | ABCB4    | AT4G35300 | TMT2     |
| AT2G47000 | ABCB4    | AT4G37640 | ACA2     |
| AT2G47000 | ABCB4    | AT4G38350 |          |
| AT2G47000 | ABCB4    | AT5G15090 | ATVDAC3  |
| AT2G47000 | ABCB4    | AT5G19760 |          |
| AT2G47000 | ABCB4    | AT5G42570 |          |
| AT2G47000 | ABCB4    | AT5G61790 | ATCNX1   |
| AT2G47000 | ABCB4    | AT5G66680 | DGL1     |
| AT2G47000 | ABCB4    | AT5G67500 | ATVDAC2  |
| AT3G01280 | ATVDAC1  | AT3G14680 | CYP72A14 |
| AT3G01280 | ATVDAC1  | AT3G60600 | (AT)VAP  |
| AT3G01280 | ATVDAC1  | AT4G21150 | HAP6     |
| AT3G01280 | ATVDAC1  | AT4G24520 | AR1      |
| AT3G01280 | ATVDAC1  | AT4G31500 | ATR4     |
| AT3G01280 | ATVDAC1  | AT4G37640 | ACA2     |
| AT3G01280 | ATVDAC1  | AT5G13490 | AAC2     |
| AT3G01280 | ATVDAC1  | AT5G15090 | ATVDAC3  |
| AT3G01280 | ATVDAC1  | AT5G42570 |          |
| AT3G01280 | ATVDAC1  | AT5G57490 | ATVDAC4  |
| AT3G01280 | ATVDAC1  | AT5G61790 | ATCNX1   |
| AT3G01280 | ATVDAC1  | AT5G66680 | DGL1     |
| AT3G01280 | ATVDAC1  | AT5G67500 | ATVDAC2  |
| AT3G01290 | AtHIR2   | AT3G02090 | MPPBETA  |
| AT3G01290 | AtHIR2   | AT3G08580 | AAC1     |
| AT3G01290 | AtHIR2   | AT3G27240 |          |
| AT3G01290 | AtHIR2   | AT3G28710 |          |
| AT3G01290 | AtHIR2   | AT3G42050 |          |
| AT3G01290 | AtHIR2   | AT3G48680 | AtCAL2   |
| AT3G01290 | AtHIR2   | AT3G57330 | ACA11    |
| AT3G01290 | AtHIR2   | AT3G62360 |          |
| AT3G01290 | AtHIR2   | AT4G16450 |          |
| AT3G01290 | AtHIR2   | AT4G27585 |          |
| AT3G01290 | AtHIR2   | AT4G30190 | AHA2     |
| AT3G01290 | AtHIR2   | AT4G32470 |          |
| AT3G01290 | AtHIR2   | AT4G39080 | VHA-A3   |
| AT3G01290 | AtHIR2   | AT5G08530 | CI51     |
| AT3G01290 | AtHIR2   | AT5G11770 |          |
| AT3G01290 | AtHIR2   | AT5G13490 | AAC2     |
| AT3G01290 | AtHIR2   | AT5G19760 |          |
| AT3G01290 | AtHIR2   | AT5G40770 | ATPHB3   |
| AT3G01290 | AtHIR2   | AT5G40810 |          |
| AT3G01290 | AtHIR2   | AT5G51570 |          |

|           |         |           |           |
|-----------|---------|-----------|-----------|
| AT3G01290 | AtHIR2  | AT5G52840 |           |
| AT3G01290 | AtHIR2  | AT5G57110 | ACA8      |
| AT3G01290 | AtHIR2  | AT5G62740 | ATHIR1    |
| AT3G01290 | AtHIR2  | AT5G66510 | GAMMA CA3 |
| AT3G02090 | MPPBETA | AT3G08580 | AAC1      |
| AT3G02090 | MPPBETA | AT3G27280 | ATPHB4    |
| AT3G02090 | MPPBETA | AT3G42050 |           |
| AT3G02090 | MPPBETA | AT3G48680 | AtCAL2    |
| AT3G02090 | MPPBETA | AT4G16450 |           |
| AT3G02090 | MPPBETA | AT4G29900 | ACA10     |
| AT3G02090 | MPPBETA | AT4G32470 |           |
| AT3G02090 | MPPBETA | AT5G08530 | CI51      |
| AT3G02090 | MPPBETA | AT5G11770 |           |
| AT3G02090 | MPPBETA | AT5G40770 | ATPHB3    |
| AT3G02090 | MPPBETA | AT5G51570 |           |
| AT3G02090 | MPPBETA | AT5G52840 |           |
| AT3G02090 | MPPBETA | AT5G66510 | GAMMA CA3 |
| AT3G02090 | MPPBETA | ATMG00070 | NAD9      |
| AT3G02560 |         | AT4G08850 |           |
| AT3G02880 |         | AT3G08510 | ATPLC2    |
| AT3G02880 |         | AT3G21630 | CERK1     |
| AT3G02880 |         | AT5G14040 | PHT3;1    |
| AT3G03060 |         | AT3G27280 | ATPHB4    |
| AT3G03060 |         | AT4G28510 | ATPHB1    |
| AT3G03060 |         | AT5G40770 | ATPHB3    |
| AT3G03100 |         | AT3G07160 | ATGSL10   |
| AT3G03100 |         | AT3G08580 | AAC1      |
| AT3G03100 |         | AT3G27390 |           |
| AT3G03100 |         | AT3G42050 |           |
| AT3G03100 |         | AT3G48680 | AtCAL2    |
| AT3G03100 |         | AT4G16450 |           |
| AT3G03100 |         | AT4G20150 |           |
| AT3G03100 |         | AT4G32470 |           |
| AT3G03100 |         | AT5G08060 |           |
| AT3G03100 |         | AT5G08530 | CI51      |
| AT3G03100 |         | AT5G13450 | ATP5      |
| AT3G03100 |         | AT5G37510 | CI76      |
| AT3G03100 |         | AT5G52840 |           |
| AT3G03100 |         | AT5G66510 | GAMMA CA3 |
| AT3G03100 |         | ATMG00070 | NAD9      |
| AT3G03305 |         | AT3G46740 | MAR1      |
| AT3G03305 |         | AT5G40890 | ATCLC-A   |
| AT3G03960 |         | AT3G11830 |           |
| AT3G03960 |         | AT3G18190 |           |
| AT3G03960 |         | AT3G20050 | ATTCP-1   |
| AT3G03960 |         | AT5G26360 |           |
| AT3G04400 | emb2171 | AT3G04840 |           |
| AT3G04400 | emb2171 | AT4G27090 |           |
| AT3G05230 |         | AT3G51830 | ATG5      |
| AT3G05230 |         | AT4G12650 |           |
| AT3G05230 |         | AT4G38350 |           |
| AT3G05280 |         | AT4G30260 |           |

|           |         |           |           |
|-----------|---------|-----------|-----------|
| AT3G05560 |         | AT5G27770 |           |
| AT3G05970 | ATLACS6 | AT3G27570 |           |
| AT3G05970 | ATLACS6 | AT3G28450 |           |
| AT3G05970 | ATLACS6 | AT3G57010 |           |
| AT3G05970 | ATLACS6 | AT5G43970 | ATTOM22-V |
| AT3G05970 | ATLACS6 | AT5G58270 | ABCB25    |
| AT3G07160 | ATGSL10 | AT3G48680 | AtCAL2    |
| AT3G07160 | ATGSL10 | AT3G51550 | FER       |
| AT3G07160 | ATGSL10 | AT3G53480 | ABCG37    |
| AT3G07160 | ATGSL10 | AT4G02580 |           |
| AT3G07160 | ATGSL10 | AT4G16450 |           |
| AT3G07160 | ATGSL10 | AT4G32470 |           |
| AT3G07160 | ATGSL10 | AT4G33430 | ATBAK1    |
| AT3G07160 | ATGSL10 | AT5G08060 |           |
| AT3G07160 | ATGSL10 | AT5G08530 | CI51      |
| AT3G07160 | ATGSL10 | AT5G37510 | CI76      |
| AT3G07160 | ATGSL10 | AT5G52840 |           |
| AT3G07160 | ATGSL10 | AT5G66510 | GAMMA CA3 |
| AT3G07568 |         | AT5G40930 | TOM20-4   |
| AT3G07568 |         | AT5G53650 |           |
| AT3G07570 |         | AT3G28450 |           |
| AT3G07570 |         | AT4G29130 | ATHXK1    |
| AT3G07570 |         | AT5G18480 | PGSIP6    |
| AT3G07570 |         | AT5G25100 |           |
| AT3G07950 |         | AT4G28770 |           |
| AT3G08510 | ATPLC2  | AT3G57330 | ACA11     |
| AT3G08510 | ATPLC2  | AT4G30190 | AHA2      |
| AT3G08510 | ATPLC2  | AT5G49760 |           |
| AT3G08510 | ATPLC2  | AT5G57110 | ACA8      |
| AT3G08530 |         | AT4G39200 |           |
| AT3G08580 | AAC1    | AT3G27240 |           |
| AT3G08580 | AAC1    | AT3G28710 |           |
| AT3G08580 | AAC1    | AT3G42050 |           |
| AT3G08580 | AAC1    | AT3G48680 | AtCAL2    |
| AT3G08580 | AAC1    | AT3G57330 | ACA11     |
| AT3G08580 | AAC1    | AT4G29900 | ACA10     |
| AT3G08580 | AAC1    | AT4G32470 |           |
| AT3G08580 | AAC1    | AT5G08530 | CI51      |
| AT3G08580 | AAC1    | AT5G11770 |           |
| AT3G08580 | AAC1    | AT5G13450 | ATP5      |
| AT3G08580 | AAC1    | AT5G18800 |           |
| AT3G08580 | AAC1    | AT5G19760 |           |
| AT3G08580 | AAC1    | AT5G37510 | CI76      |
| AT3G08580 | AAC1    | AT5G40810 |           |
| AT3G08580 | AAC1    | AT5G49760 |           |
| AT3G08580 | AAC1    | AT5G52840 |           |
| AT3G08580 | AAC1    | AT5G64030 |           |
| AT3G08580 | AAC1    | AT5G66510 | GAMMA CA3 |
| AT3G08580 | AAC1    | AT5G67590 | FRO1      |
| AT3G08580 | AAC1    | ATMG00070 | NAD9      |
| AT3G10950 |         | AT5G45775 |           |
| AT3G11070 |         | AT5G05520 |           |

|           |          |           |           |
|-----------|----------|-----------|-----------|
| AT3G11070 |          | AT5G15090 | ATVDAC3   |
| AT3G11130 |          | AT4G31985 |           |
| AT3G11730 | ATFP8    | AT3G14840 |           |
| AT3G11830 |          | AT3G18190 |           |
| AT3G11830 |          | AT3G20050 | ATTCP-1   |
| AT3G11830 |          | AT5G26360 |           |
| AT3G13772 | AtTMN7   | AT3G26210 | CYP71B23  |
| AT3G13772 | AtTMN7   | AT4G00900 | ATECA2    |
| AT3G13772 | AtTMN7   | AT4G01320 | ATSTE24   |
| AT3G13772 | AtTMN7   | AT4G29130 | ATHXK1    |
| AT3G13772 | AtTMN7   | AT4G35230 | BSK1      |
| AT3G13772 | AtTMN7   | AT5G08080 | ATSYN132  |
| AT3G13772 | AtTMN7   | AT5G18480 | PGSIP6    |
| AT3G13772 | AtTMN7   | AT5G20660 |           |
| AT3G13772 | AtTMN7   | AT5G25100 |           |
| AT3G13772 | AtTMN7   | AT5G52240 | AtMAPR5   |
| AT3G13772 | AtTMN7   | AT5G58270 | ABCB25    |
| AT3G13870 | GOM8     | AT3G54110 | ATPUMP1   |
| AT3G13870 | GOM8     | AT3G57330 | ACA11     |
| AT3G13870 | GOM8     | AT4G29900 | ACA10     |
| AT3G13870 | GOM8     | AT5G19760 |           |
| AT3G14610 | CYP72A7  | ATMG00220 | COB       |
| AT3G14610 | CYP72A7  | AT3G47833 | SDH7      |
| AT3G14610 | CYP72A7  | AT3G54110 | ATPUMP1   |
| AT3G14610 | CYP72A7  | AT4G21150 | HAP6      |
| AT3G14610 | CYP72A7  | AT4G37640 | ACA2      |
| AT3G14610 | CYP72A7  | AT5G10780 |           |
| AT3G14610 | CYP72A7  | AT5G11560 |           |
| AT3G14610 | CYP72A7  | AT5G13490 | AAC2      |
| AT3G14610 | CYP72A7  | AT5G66680 | DGL1      |
| AT3G14610 | CYP72A7  | AT5G67500 | ATVDAC2   |
| AT3G14680 | CYP72A14 | AT3G20940 | CYP705A30 |
| AT3G14680 | CYP72A14 | AT3G47833 | SDH7      |
| AT3G14680 | CYP72A14 | AT3G54110 | ATPUMP1   |
| AT3G14680 | CYP72A14 | AT3G60600 | (AT)VAP   |
| AT3G14680 | CYP72A14 | AT4G14070 | AAE15     |
| AT3G14680 | CYP72A14 | AT4G21150 | HAP6      |
| AT3G14680 | CYP72A14 | AT4G24520 | AR1       |
| AT3G14680 | CYP72A14 | AT4G29130 | ATHXK1    |
| AT3G14680 | CYP72A14 | AT4G31500 | ATR4      |
| AT3G14680 | CYP72A14 | AT5G15090 | ATVDAC3   |
| AT3G14680 | CYP72A14 | AT5G42570 |           |
| AT3G14680 | CYP72A14 | AT5G57490 | ATVDAC4   |
| AT3G14840 |          | AT4G00710 | BSK3      |
| AT3G14840 |          | AT4G00740 | QUA3      |
| AT3G14840 |          | AT5G45750 | AtRABA1c  |
| AT3G16480 | MPPalpha | AT3G27240 |           |
| AT3G16480 | MPPalpha | AT3G57330 | ACA11     |
| AT3G16480 | MPPalpha | AT4G29900 | ACA10     |
| AT3G16480 | MPPalpha | AT5G16590 | LRR1      |
| AT3G16480 | MPPalpha | AT5G19760 |           |
| AT3G16480 | MPPalpha | AT5G40810 |           |



|           |           |           |            |
|-----------|-----------|-----------|------------|
| AT3G16480 | MPPalpha  | AT5G49760 |            |
| AT3G16480 | MPPalpha  | AT5G64030 |            |
| AT3G16480 | MPPalpha  | AT5G67590 | FRO1       |
| AT3G18190 |           | AT3G20050 | ATTCP-1    |
| AT3G18190 |           | AT5G26360 |            |
| AT3G18410 |           | AT3G27280 | ATPHB4     |
| AT3G18410 |           | AT3G46740 | MAR1       |
| AT3G18410 |           | AT3G62360 |            |
| AT3G18410 |           | AT4G16450 |            |
| AT3G18410 |           | AT4G17140 |            |
| AT3G18410 |           | AT4G27585 |            |
| AT3G18410 |           | AT4G28510 | ATPHB1     |
| AT3G18410 |           | AT4G32470 |            |
| AT3G18410 |           | AT5G11770 |            |
| AT3G18410 |           | AT5G40480 | EMB3012    |
| AT3G18410 |           | AT5G40770 | ATPHB3     |
| AT3G18820 | ATRAB7B   | AT4G39990 | ATGB3      |
| AT3G19340 |           | AT3G27820 | ATMDAR4    |
| AT3G19930 | ATSTP4    | AT4G25640 | ATDTX35    |
| AT3G20050 | ATTCP-1   | AT5G26360 |            |
| AT3G20920 |           | AT4G38240 | CGL        |
| AT3G20940 | CYP705A30 | AT3G60600 | (AT)VAP    |
| AT3G20940 | CYP705A30 | AT4G31500 | ATR4       |
| AT3G20940 | CYP705A30 | AT4G35230 | BSK1       |
| AT3G20940 | CYP705A30 | AT5G20660 |            |
| AT3G20940 | CYP705A30 | AT5G27540 | emb2473    |
| AT3G20940 | CYP705A30 | AT5G42570 |            |
| AT3G21630 | CERK1     | AT5G14040 | PHT3;1     |
| AT3G22110 | PAC1      | AT3G27430 | PBB1       |
| AT3G22110 | PAC1      | AT3G60820 | PBF1       |
| AT3G22110 | PAC1      | AT4G31300 | PBA1       |
| AT3G22110 | PAC1      | AT5G42790 | ARS5       |
| AT3G22110 | PAC1      | AT5G56500 | Cpn60beta3 |
| AT3G22370 | AOX1A     | AT3G57010 |            |
| AT3G22370 | AOX1A     | AT5G01500 | TAAC       |
| AT3G23990 | HSP60     | AT3G60820 | PBF1       |
| AT3G23990 | HSP60     | AT5G42790 | ARS5       |
| AT3G23990 | HSP60     | AT5G56500 | Cpn60beta3 |
| AT3G24300 | AMT1;3    | ATMG00220 | COB        |
| AT3G24300 | AMT1;3    | AT3G47833 | SDH7       |
| AT3G24300 | AMT1;3    | AT3G54110 | ATPUMP1    |
| AT3G24300 | AMT1;3    | AT4G21150 | HAP6       |
| AT3G24300 | AMT1;3    | AT5G19760 |            |
| AT3G25290 |           | AT5G07910 |            |
| AT3G26210 | CYP71B23  | AT4G01320 | ATSTE24    |
| AT3G26210 | CYP71B23  | AT5G12470 |            |
| AT3G26210 | CYP71B23  | AT5G20660 |            |
| AT3G26210 | CYP71B23  | AT5G36220 | CYP81D1    |
| AT3G27240 |           | AT3G28710 |            |
| AT3G27240 |           | AT3G48680 | AtCAL2     |
| AT3G27240 |           | AT3G57330 | ACA11      |
| AT3G27240 |           | AT4G29900 | ACA10      |

|           |        |           |            |
|-----------|--------|-----------|------------|
| AT3G27240 |        | AT5G08530 | CI51       |
| AT3G27240 |        | AT5G14950 | ATGMII     |
| AT3G27240 |        | AT5G19760 |            |
| AT3G27240 |        | AT5G37510 | CI76       |
| AT3G27240 |        | AT5G40810 |            |
| AT3G27240 |        | AT5G49760 |            |
| AT3G27240 |        | AT5G57110 | ACA8       |
| AT3G27240 |        | AT5G62740 | ATHIR1     |
| AT3G27240 |        | AT5G66510 | GAMMA CA3  |
| AT3G27240 |        | AT5G67590 | FRO1       |
| AT3G27240 |        | ATMG00070 | NAD9       |
| AT3G27280 | ATPHB4 | AT5G05370 |            |
| AT3G27280 | ATPHB4 | AT3G44330 |            |
| AT3G27280 | ATPHB4 | AT3G57650 | LPAT2      |
| AT3G27280 | ATPHB4 | AT4G27585 |            |
| AT3G27280 | ATPHB4 | AT4G28510 | ATPHB1     |
| AT3G27280 | ATPHB4 | AT4G39080 | VHA-A3     |
| AT3G27280 | ATPHB4 | AT5G11770 |            |
| AT3G27280 | ATPHB4 | AT5G25450 |            |
| AT3G27280 | ATPHB4 | AT5G40770 | ATPHB3     |
| AT3G27280 | ATPHB4 | AT5G46800 | BOU        |
| AT3G27325 |        | AT5G53170 | FTSH11     |
| AT3G27430 | PBB1   | AT3G60820 | PBF1       |
| AT3G27430 | PBB1   | AT4G31300 | PBA1       |
| AT3G27430 | PBB1   | AT5G42790 | ARS5       |
| AT3G27430 | PBB1   | AT5G56500 | Cpn60beta3 |
| AT3G27570 |        | AT3G57010 |            |
| AT3G28450 |        | AT3G52190 | AtPHF1     |
| AT3G28450 |        | AT5G18480 | PGSIP6     |
| AT3G28450 |        | AT5G40780 | LHT1       |
| AT3G28450 |        | ATMG00160 | COX2       |
| AT3G28710 |        | AT3G48680 | AtCAL2     |
| AT3G28710 |        | AT3G57330 | ACA11      |
| AT3G28710 |        | AT4G29900 | ACA10      |
| AT3G28710 |        | AT4G30190 | AHA2       |
| AT3G28710 |        | AT5G08530 | CI51       |
| AT3G28710 |        | AT5G13490 | AAC2       |
| AT3G28710 |        | AT5G40810 |            |
| AT3G28710 |        | AT5G46800 | BOU        |
| AT3G28710 |        | AT5G62740 | ATHIR1     |
| AT3G28710 |        | AT5G66510 | GAMMA CA3  |
| AT3G28710 |        | ATMG00070 | NAD9       |
| AT3G28720 |        | AT4G17140 |            |
| AT3G28720 |        | AT5G40890 | ATCLC-A    |
| AT3G28860 | ABCB19 | AT4G35300 | TMT2       |
| AT3G42050 |        | AT3G48680 | AtCAL2     |
| AT3G42050 |        | AT4G16450 |            |
| AT3G42050 |        | AT4G29900 | ACA10      |
| AT3G42050 |        | AT4G32470 |            |
| AT3G42050 |        | AT5G08530 | CI51       |
| AT3G42050 |        | AT5G11770 |            |
| AT3G42050 |        | AT5G37510 | CI76       |

|           |        |           |           |
|-----------|--------|-----------|-----------|
| AT3G42050 |        | AT5G51570 |           |
| AT3G42050 |        | AT5G52840 |           |
| AT3G42050 |        | AT5G66510 | GAMMA CA3 |
| AT3G42050 |        | ATMG00070 | NAD9      |
| AT3G44330 |        | AT4G12590 |           |
| AT3G44330 |        | AT5G40770 | ATPHB3    |
| AT3G44330 |        | AT5G46800 | BOU       |
| AT3G46280 |        | AT5G14040 | PHT3;1    |
| AT3G46740 | MAR1   | AT3G55360 | ATTSC13   |
| AT3G46740 | MAR1   | AT3G62360 |           |
| AT3G46740 | MAR1   | AT4G17140 |           |
| AT3G46740 | MAR1   | AT4G27585 |           |
| AT3G46740 | MAR1   | AT5G05000 | ATTOC34   |
| AT3G46740 | MAR1   | AT5G23630 | MIA       |
| AT3G46740 | MAR1   | AT5G40480 | EMB3012   |
| AT3G46740 | MAR1   | AT5G40890 | ATCLC-A   |
| AT3G47833 | SDH7   | ATMG00220 | COB       |
| AT3G47833 | SDH7   | AT3G54110 | ATPUMP1   |
| AT3G47833 | SDH7   | AT3G60600 | (AT)VAP   |
| AT3G47833 | SDH7   | AT3G62700 | ABCC14    |
| AT3G47833 | SDH7   | AT4G12650 |           |
| AT3G47833 | SDH7   | AT4G21150 | HAP6      |
| AT3G47833 | SDH7   | AT4G24520 | AR1       |
| AT3G47833 | SDH7   | AT4G37640 | ACA2      |
| AT3G47833 | SDH7   | AT4G38350 |           |
| AT3G47833 | SDH7   | AT5G11560 |           |
| AT3G47833 | SDH7   | AT5G15090 | ATVDAC3   |
| AT3G47833 | SDH7   | AT5G19760 |           |
| AT3G47833 | SDH7   | AT5G40510 |           |
| AT3G47833 | SDH7   | AT5G56730 |           |
| AT3G47833 | SDH7   | AT5G57490 | ATVDAC4   |
| AT3G47833 | SDH7   | AT5G66680 | DGL1      |
| AT3G47833 | SDH7   | AT5G67500 | ATVDAC2   |
| AT3G48380 |        | AT5G50650 |           |
| AT3G48380 |        | AT5G51510 |           |
| AT3G48380 |        | AT5G66680 | DGL1      |
| AT3G48410 |        | AT5G17770 | ATCBR     |
| AT3G48570 |        | AT5G58640 |           |
| AT3G48570 |        | ATMG00160 | COX2      |
| AT3G48680 | AtCAL2 | AT3G51550 | FER       |
| AT3G48680 | AtCAL2 | AT3G53480 | ABCG37    |
| AT3G48680 | AtCAL2 | AT3G57330 | ACA11     |
| AT3G48680 | AtCAL2 | AT4G16450 |           |
| AT3G48680 | AtCAL2 | AT4G20150 |           |
| AT3G48680 | AtCAL2 | AT4G29900 | ACA10     |
| AT3G48680 | AtCAL2 | AT4G32470 |           |
| AT3G48680 | AtCAL2 | AT5G08530 | CI51      |
| AT3G48680 | AtCAL2 | AT5G11770 |           |
| AT3G48680 | AtCAL2 | AT5G13450 | ATP5      |
| AT3G48680 | AtCAL2 | AT5G18800 |           |
| AT3G48680 | AtCAL2 | AT5G37510 | CI76      |
| AT3G48680 | AtCAL2 | AT5G40810 |           |

|           |         |           |           |
|-----------|---------|-----------|-----------|
| AT3G48680 | AtCAL2  | AT5G52840 |           |
| AT3G48680 | AtCAL2  | AT5G62740 | ATHIR1    |
| AT3G48680 | AtCAL2  | AT5G66510 | GAMMA CA3 |
| AT3G48680 | AtCAL2  | AT5G67590 | FRO1      |
| AT3G48680 | AtCAL2  | ATMG00070 | NAD9      |
| AT3G51460 | RHD4    | AT3G62360 |           |
| AT3G51460 | RHD4    | AT4G27585 |           |
| AT3G51550 | FER     | AT4G02580 |           |
| AT3G51550 | FER     | AT4G08850 |           |
| AT3G51550 | FER     | AT4G16450 |           |
| AT3G51550 | FER     | AT4G32470 |           |
| AT3G51550 | FER     | AT4G33430 | ATBAK1    |
| AT3G51550 | FER     | AT5G08530 | CI51      |
| AT3G51550 | FER     | AT5G37510 | CI76      |
| AT3G51550 | FER     | AT5G52840 |           |
| AT3G51550 | FER     | AT5G66510 | GAMMA CA3 |
| AT3G51550 | FER     | ATMG00070 | NAD9      |
| AT3G52190 | AtPHF1  | AT3G61070 | PEX11E    |
| AT3G52190 | AtPHF1  | AT5G50460 |           |
| AT3G52190 | AtPHF1  | AT4G29130 | ATHXK1    |
| AT3G52730 |         | AT4G34640 | ERG9      |
| AT3G52730 |         | AT5G20090 |           |
| AT3G53480 | ABCG37  | AT4G16450 |           |
| AT3G53480 | ABCG37  | AT4G32470 |           |
| AT3G53480 | ABCG37  | AT5G08060 |           |
| AT3G53480 | ABCG37  | AT5G08530 | CI51      |
| AT3G53480 | ABCG37  | AT5G18800 |           |
| AT3G53480 | ABCG37  | AT5G52840 |           |
| AT3G53480 | ABCG37  | ATMG00070 | NAD9      |
| AT3G53740 |         | AT4G27090 |           |
| AT3G54110 | ATPUMP1 | ATMG00220 | COB       |
| AT3G54110 | ATPUMP1 | AT3G55320 | ABCB20    |
| AT3G54110 | ATPUMP1 | AT3G60600 | (AT)VAP   |
| AT3G54110 | ATPUMP1 | AT3G62700 | ABCC14    |
| AT3G54110 | ATPUMP1 | AT4G12650 |           |
| AT3G54110 | ATPUMP1 | AT4G21150 | HAP6      |
| AT3G54110 | ATPUMP1 | AT4G24520 | AR1       |
| AT3G54110 | ATPUMP1 | AT4G29900 | ACA10     |
| AT3G54110 | ATPUMP1 | AT4G37640 | ACA2      |
| AT3G54110 | ATPUMP1 | AT4G38350 |           |
| AT3G54110 | ATPUMP1 | AT5G11560 |           |
| AT3G54110 | ATPUMP1 | AT5G13490 | AAC2      |
| AT3G54110 | ATPUMP1 | AT5G15090 | ATVDAC3   |
| AT3G54110 | ATPUMP1 | AT5G19760 |           |
| AT3G54110 | ATPUMP1 | AT5G42570 |           |
| AT3G54110 | ATPUMP1 | AT5G47890 |           |
| AT3G54110 | ATPUMP1 | AT5G56730 |           |
| AT3G54110 | ATPUMP1 | AT5G57490 | ATVDAC4   |
| AT3G54110 | ATPUMP1 | AT5G66680 | DGL1      |
| AT3G54110 | ATPUMP1 | AT5G67500 | ATVDAC2   |
| AT3G55320 | ABCB20  | AT5G19760 |           |
| AT3G55320 | ABCB20  | AT5G56730 |           |

|           |             |           |            |
|-----------|-------------|-----------|------------|
| AT3G55360 | ATTSC13     | AT5G23630 | MIA        |
| AT3G56190 | ALPHA-SNAP2 | AT5G62865 |            |
| AT3G57280 |             | AT5G36220 | CYP81D1    |
| AT3G57330 | ACA11       | AT4G01100 | ADNT1      |
| AT3G57330 | ACA11       | AT4G29900 | ACA10      |
| AT3G57330 | ACA11       | AT4G30190 | AHA2       |
| AT3G57330 | ACA11       | AT5G19760 |            |
| AT3G57330 | ACA11       | AT5G37510 | CI76       |
| AT3G57330 | ACA11       | AT5G40810 |            |
| AT3G57330 | ACA11       | AT5G49760 |            |
| AT3G57330 | ACA11       | AT5G51570 |            |
| AT3G57330 | ACA11       | AT5G57110 | ACA8       |
| AT3G57330 | ACA11       | AT5G67590 | FRO1       |
| AT3G57330 | ACA11       | ATMG00070 | NAD9       |
| AT3G57650 | LPAT2       | AT5G40770 | ATPHB3     |
| AT3G60600 | (AT)VAP     | AT4G14070 | AAE15      |
| AT3G60600 | (AT)VAP     | AT4G21150 | HAP6       |
| AT3G60600 | (AT)VAP     | AT4G24520 | AR1        |
| AT3G60600 | (AT)VAP     | AT4G31500 | ATR4       |
| AT3G60600 | (AT)VAP     | AT4G37640 | ACA2       |
| AT3G60600 | (AT)VAP     | AT5G15090 | ATVDAC3    |
| AT3G60600 | (AT)VAP     | AT5G42570 |            |
| AT3G60600 | (AT)VAP     | AT5G56730 |            |
| AT3G60600 | (AT)VAP     | AT5G57490 | ATVDAC4    |
| AT3G60600 | (AT)VAP     | AT5G61790 | ATCNX1     |
| AT3G60600 | (AT)VAP     | AT5G66680 | DGL1       |
| AT3G60600 | (AT)VAP     | AT5G67500 | ATVDAC2    |
| AT3G60820 | PBF1        | AT4G31300 | PBA1       |
| AT3G60820 | PBF1        | AT5G42790 | ARS5       |
| AT3G60820 | PBF1        | AT5G56500 | Cpn60beta3 |
| AT3G62360 |             | AT4G17140 |            |
| AT3G62360 |             | AT4G27585 |            |
| AT3G62360 |             | AT4G28510 | ATPHB1     |
| AT3G62360 |             | AT5G05000 | ATTOC34    |
| AT3G62360 |             | AT5G11770 |            |
| AT3G62360 |             | AT5G19690 | STT3A      |
| AT3G62360 |             | AT5G40480 | EMB3012    |
| AT3G62360 |             | AT5G40770 | ATPHB3     |
| AT3G62360 |             | AT5G42960 |            |
| AT3G62360 |             | AT5G46800 | BOU        |
| AT3G62360 |             | AT5G47990 | CYP705A5   |
| AT3G62700 | ABCC14      | ATMG00220 | COB        |
| AT3G62700 | ABCC14      | AT5G19760 |            |
| AT3G62830 | ATUXS2      | AT4G17140 |            |
| AT3G62830 | ATUXS2      | AT4G34670 |            |
| AT3G62830 | ATUXS2      | AT5G05000 | ATTOC34    |
| AT3G62830 | ATUXS2      | AT5G25265 |            |
| AT3G66654 |             | AT4G26410 |            |
| AT3G66658 | ALDH22A1    | AT4G14070 | AAE15      |
| AT4G00550 | DGD2        | AT4G13010 |            |
| AT4G00630 | ATKEA2      | AT5G11560 |            |
| AT4G00630 | ATKEA2      | AT5G66680 | DGL1       |

|           |          |           |           |
|-----------|----------|-----------|-----------|
| AT4G00740 | QUA3     | AT5G54110 | ATMAMI    |
| AT4G00900 | ATECA2   | AT4G14070 | AAE15     |
| AT4G00900 | ATECA2   | AT4G29130 | ATHXK1    |
| AT4G00900 | ATECA2   | AT4G29330 | DER1      |
| AT4G00900 | ATECA2   | AT5G20660 |           |
| AT4G00900 | ATECA2   | AT5G27540 | emb2473   |
| AT4G00900 | ATECA2   | AT5G58270 | ABCB25    |
| AT4G00900 | ATECA2   | ATMG00160 | COX2      |
| AT4G01100 | ADNT1    | AT5G16590 | LRR1      |
| AT4G01100 | ADNT1    | AT5G19760 |           |
| AT4G01320 | ATSTE24  | AT4G26410 |           |
| AT4G01320 | ATSTE24  | AT5G36220 | CYP81D1   |
| AT4G01320 | ATSTE24  | AT5G52240 | AtMAPR5   |
| AT4G02580 |          | AT4G16450 |           |
| AT4G02580 |          | AT4G32470 |           |
| AT4G02580 |          | AT5G04990 | ATSUN1    |
| AT4G02580 |          | AT5G66510 | GAMMA CA3 |
| AT4G11150 | emb2448  | AT4G38510 |           |
| AT4G12590 |          | AT5G05370 |           |
| AT4G12590 |          | AT4G32400 | ATBT1     |
| AT4G12590 |          | AT5G25450 |           |
| AT4G12590 |          | AT5G40770 | ATPHB3    |
| AT4G12650 |          | AT4G35300 | TMT2      |
| AT4G12650 |          | AT4G38350 |           |
| AT4G12650 |          | AT5G05520 |           |
| AT4G12650 |          | AT5G19760 |           |
| AT4G14070 | AAE15    | AT4G29330 | DER1      |
| AT4G14070 | AAE15    | AT5G27540 | emb2473   |
| AT4G14070 | AAE15    | AT5G40510 |           |
| AT4G16450 |          | AT4G32470 |           |
| AT4G16450 |          | AT4G33430 | ATBAK1    |
| AT4G16450 |          | AT5G08060 |           |
| AT4G16450 |          | AT5G08530 | CI51      |
| AT4G16450 |          | AT5G11770 |           |
| AT4G16450 |          | AT5G18800 |           |
| AT4G16450 |          | AT5G37510 | CI76      |
| AT4G16450 |          | AT5G49890 | ATCLC-C   |
| AT4G16450 |          | AT5G52840 |           |
| AT4G16450 |          | AT5G66510 | GAMMA CA3 |
| AT4G16450 |          | ATMG00070 | NAD9      |
| AT4G17140 |          | AT4G27585 |           |
| AT4G17140 |          | AT4G28510 | ATPHB1    |
| AT4G17140 |          | AT5G05000 | ATTOC34   |
| AT4G17140 |          | AT5G40480 | EMB3012   |
| AT4G17140 |          | AT5G40890 | ATCLC-A   |
| AT4G20110 | BP80-3;1 | AT5G04930 | ALA1      |
| AT4G20150 |          | AT5G37510 | CI76      |
| AT4G21150 | HAP6     | ATMG00220 | COB       |
| AT4G21150 | HAP6     | AT4G24520 | AR1       |
| AT4G21150 | HAP6     | AT4G37640 | ACA2      |
| AT4G21150 | HAP6     | AT5G11560 |           |
| AT4G21150 | HAP6     | AT5G13490 | AAC2      |

|           |             |           |          |
|-----------|-------------|-----------|----------|
| AT4G21150 | HAP6        | AT5G15090 | ATVDAC3  |
| AT4G21150 | HAP6        | AT5G42570 |          |
| AT4G21150 | HAP6        | AT5G57490 | ATVDAC4  |
| AT4G21150 | HAP6        | AT5G61790 | ATCNX1   |
| AT4G21150 | HAP6        | AT5G64290 | DCT      |
| AT4G21150 | HAP6        | AT5G66680 | DGL1     |
| AT4G21150 | HAP6        | AT5G67500 | ATVDAC2  |
| AT4G23430 | AtTic32-IVa | AT5G10730 |          |
| AT4G24520 | AR1         | AT4G31500 | ATR4     |
| AT4G24520 | AR1         | AT4G37640 | ACA2     |
| AT4G24520 | AR1         | AT5G15090 | ATVDAC3  |
| AT4G24520 | AR1         | AT5G40510 |          |
| AT4G24520 | AR1         | AT5G42570 |          |
| AT4G24520 | AR1         | AT5G56730 |          |
| AT4G24520 | AR1         | AT5G57490 | ATVDAC4  |
| AT4G24520 | AR1         | AT5G66680 | DGL1     |
| AT4G24520 | AR1         | AT5G67500 | ATVDAC2  |
| AT4G26010 |             | AT5G42080 | ADL1     |
| AT4G26210 |             | AT4G29480 |          |
| AT4G26410 |             | AT4G35000 | APX3     |
| AT4G26410 |             | AT5G18480 | PGSIP6   |
| AT4G26410 |             | AT5G25100 |          |
| AT4G26410 |             | AT5G51220 |          |
| AT4G27080 | ATPDI7      | AT5G55940 | emb2731  |
| AT4G27090 |             | AT5G45775 |          |
| AT4G27585 |             | AT4G28510 | ATPHB1   |
| AT4G27585 |             | AT4G39080 | VHA-A3   |
| AT4G27585 |             | AT5G05000 | ATTOC34  |
| AT4G27585 |             | AT5G11770 |          |
| AT4G27585 |             | AT5G40770 | ATPHB3   |
| AT4G27585 |             | AT5G42960 |          |
| AT4G27585 |             | AT5G46800 | BOU      |
| AT4G28510 | ATPHB1      | AT4G38240 | CGL      |
| AT4G28510 | ATPHB1      | AT5G11770 |          |
| AT4G28510 | ATPHB1      | AT5G40480 | EMB3012  |
| AT4G28510 | ATPHB1      | AT5G40770 | ATPHB3   |
| AT4G28510 | ATPHB1      | AT5G54100 |          |
| AT4G28510 | ATPHB1      | ATMG00270 | NAD6     |
| AT4G29130 | ATHXK1      | AT5G50460 |          |
| AT4G29130 | ATHXK1      | AT4G29330 | DER1     |
| AT4G29130 | ATHXK1      | AT4G35230 | BSK1     |
| AT4G29130 | ATHXK1      | AT5G08080 | ATSYP132 |
| AT4G29130 | ATHXK1      | AT5G18480 | PGSIP6   |
| AT4G29130 | ATHXK1      | AT5G20660 |          |
| AT4G29130 | ATHXK1      | AT5G25100 |          |
| AT4G29130 | ATHXK1      | AT5G27540 | emb2473  |
| AT4G29130 | ATHXK1      | AT5G58270 | ABCB25   |
| AT4G29130 | ATHXK1      | ATMG00160 | COX2     |
| AT4G29480 |             | AT5G20090 |          |
| AT4G29900 | ACA10       | AT5G13490 | AAC2     |
| AT4G29900 | ACA10       | AT5G19760 |          |
| AT4G29900 | ACA10       | AT5G57110 | ACA8     |

|           |         |           |            |
|-----------|---------|-----------|------------|
| AT4G29900 | ACA10   | ATMG00070 | NAD9       |
| AT4G30190 | AHA2    | AT5G40810 |            |
| AT4G30190 | AHA2    | AT5G51570 |            |
| AT4G30190 | AHA2    | AT5G57110 | ACA8       |
| AT4G30260 |         | AT5G06320 | NHL3       |
| AT4G31300 | PBA1    | AT5G42790 | ARS5       |
| AT4G31300 | PBA1    | AT5G56500 | Cpn60beta3 |
| AT4G31500 | ATR4    | AT4G35230 | BSK1       |
| AT4G31500 | ATR4    | AT5G20660 |            |
| AT4G31500 | ATR4    | AT5G27540 | emb2473    |
| AT4G31500 | ATR4    | AT5G35460 |            |
| AT4G31500 | ATR4    | AT5G40510 |            |
| AT4G31500 | ATR4    | AT5G42570 |            |
| AT4G31500 | ATR4    | AT5G42590 | CYP71A16   |
| AT4G31500 | ATR4    | AT5G52240 | AtMAPR5    |
| AT4G32400 | ATBT1   | AT4G38920 | ATVHA-C3   |
| AT4G32400 | ATBT1   | AT5G11560 |            |
| AT4G32400 | ATBT1   | AT5G13490 | AAC2       |
| AT4G32400 | ATBT1   | AT5G14950 | ATGMII     |
| AT4G32400 | ATBT1   | AT5G67500 | ATVDAC2    |
| AT4G32410 | AtCESA1 | AT5G13450 | ATP5       |
| AT4G32410 | AtCESA1 | AT5G18800 |            |
| AT4G32470 |         | AT5G08060 |            |
| AT4G32470 |         | AT5G08530 | CI51       |
| AT4G32470 |         | AT5G11770 |            |
| AT4G32470 |         | AT5G18800 |            |
| AT4G32470 |         | AT5G37510 | CI76       |
| AT4G32470 |         | AT5G52840 |            |
| AT4G32470 |         | AT5G66510 | GAMMA CA3  |
| AT4G32470 |         | ATMG00070 | NAD9       |
| AT4G33430 | ATBAK1  | AT5G11770 |            |
| AT4G33865 |         | AT5G50650 |            |
| AT4G35000 | APX3    | AT5G43970 | ATTOM22-V  |
| AT4G35000 | APX3    | AT5G58270 | ABCB25     |
| AT4G35230 | BSK1    | AT5G07910 |            |
| AT4G35230 | BSK1    | AT5G18480 | PGSIP6     |
| AT4G35230 | BSK1    | AT5G27540 | emb2473    |
| AT4G35230 | BSK1    | AT5G42590 | CYP71A16   |
| AT4G35230 | BSK1    | AT5G52240 | AtMAPR5    |
| AT4G35300 | TMT2    | AT4G38350 |            |
| AT4G35300 | TMT2    | AT5G57350 | AHA3       |
| AT4G36750 |         | AT5G52240 | AtMAPR5    |
| AT4G37640 | ACA2    | AT5G11560 |            |
| AT4G37640 | ACA2    | AT5G13490 | AAC2       |
| AT4G37640 | ACA2    | AT5G15090 | ATVDAC3    |
| AT4G37640 | ACA2    | AT5G40510 |            |
| AT4G37640 | ACA2    | AT5G48000 | CYP708 A2  |
| AT4G37640 | ACA2    | AT5G66680 | DGL1       |
| AT4G37640 | ACA2    | AT5G67500 | ATVDAC2    |
| AT4G38240 | CGL     | AT5G19690 | STT3A      |
| AT4G38240 | CGL     | AT5G40480 | EMB3012    |
| AT4G38350 |         | ATMG00220 | COB        |



|           |         |           |           |
|-----------|---------|-----------|-----------|
| AT4G38350 |         | AT5G14040 | PHT3;1    |
| AT4G38350 |         | AT5G19760 |           |
| AT4G38350 |         | AT5G27540 | emb2473   |
| AT4G38350 |         | AT5G42590 | CYP71A16  |
| AT4G38350 |         | AT5G56730 |           |
| AT4G38350 |         | AT5G57110 | ACA8      |
| AT4G38350 |         | ATMG00160 | COX2      |
| AT4G39080 | VHA-A3  | AT5G11770 |           |
| AT4G39080 | VHA-A3  | AT5G47990 | CYP705A5  |
| AT4G39080 | VHA-A3  | ATMG00270 | NAD6      |
| AT5G01500 | TAAC    | AT5G36220 | CYP81D1   |
| AT5G01500 | TAAC    | AT5G42270 | FTSH5     |
| AT5G04830 |         | AT5G42150 |           |
| AT5G04930 | ALA1    | AT5G16590 | LRR1      |
| AT5G04930 | ALA1    | AT5G49760 |           |
| AT5G04930 | ALA1    | AT5G57110 | ACA8      |
| AT5G05000 | ATTOC34 | AT5G23630 | MIA       |
| AT5G05000 | ATTOC34 | AT5G40480 | EMB3012   |
| AT5G05000 | ATTOC34 | AT5G42960 |           |
| AT5G05370 |         | AT5G40770 | ATPHB3    |
| AT5G07090 |         | AT5G15200 |           |
| AT5G08060 |         | AT5G08530 | CI51      |
| AT5G08060 |         | AT5G11770 |           |
| AT5G08060 |         | AT5G18800 |           |
| AT5G08060 |         | AT5G52840 |           |
| AT5G08060 |         | AT5G66510 | GAMMA CA3 |
| AT5G08530 | CI51    | AT5G11770 |           |
| AT5G08530 | CI51    | AT5G13450 | ATP5      |
| AT5G08530 | CI51    | AT5G18800 |           |
| AT5G08530 | CI51    | AT5G37510 | CI76      |
| AT5G08530 | CI51    | AT5G40810 |           |
| AT5G08530 | CI51    | AT5G52840 |           |
| AT5G08530 | CI51    | AT5G66510 | GAMMA CA3 |
| AT5G08530 | CI51    | AT5G67590 | FRO1      |
| AT5G08530 | CI51    | ATMG00070 | NAD9      |
| AT5G08540 |         | AT5G09995 |           |
| AT5G11560 |         | ATMG00220 | COB       |
| AT5G11560 |         | AT5G13490 | AAC2      |
| AT5G11560 |         | AT5G19760 |           |
| AT5G11560 |         | AT5G66680 | DGL1      |
| AT5G11560 |         | AT5G67500 | ATVDAC2   |
| AT5G11770 |         | AT5G40770 | ATPHB3    |
| AT5G11770 |         | AT5G46800 | BOU       |
| AT5G11770 |         | AT5G52840 |           |
| AT5G11770 |         | AT5G54100 |           |
| AT5G11770 |         | AT5G66510 | GAMMA CA3 |
| AT5G11770 |         | ATMG00070 | NAD9      |
| AT5G12470 |         | AT5G36220 | CYP81D1   |
| AT5G13450 | ATP5    | AT5G18800 |           |
| AT5G13450 | ATP5    | AT5G37510 | CI76      |
| AT5G13450 | ATP5    | AT5G51570 |           |
| AT5G13450 | ATP5    | AT5G52840 |           |

|           |         |           |           |
|-----------|---------|-----------|-----------|
| AT5G13450 | ATP5    | AT5G66510 | GAMMA CA3 |
| AT5G13450 | ATP5    | ATMG00070 | NAD9      |
| AT5G13490 | AAC2    | ATMG00220 | COB       |
| AT5G13490 | AAC2    | AT5G14950 | ATGMII    |
| AT5G13490 | AAC2    | AT5G15090 | ATVDAC3   |
| AT5G13490 | AAC2    | AT5G19760 |           |
| AT5G13490 | AAC2    | AT5G46800 | BOU       |
| AT5G13490 | AAC2    | AT5G47890 |           |
| AT5G13490 | AAC2    | AT5G48000 | CYP708 A2 |
| AT5G13490 | AAC2    | AT5G66680 | DGL1      |
| AT5G13490 | AAC2    | AT5G67500 | ATVDAC2   |
| AT5G14040 | PHT3;1  | AT5G50460 |           |
| AT5G14040 | PHT3;1  | AT5G27540 | emb2473   |
| AT5G14040 | PHT3;1  | AT5G42590 | CYP71A16  |
| AT5G14950 | ATGMII  | AT5G40810 |           |
| AT5G15090 | ATVDAC3 | AT5G42570 |           |
| AT5G15090 | ATVDAC3 | AT5G57490 | ATVDAC4   |
| AT5G15090 | ATVDAC3 | AT5G61790 | ATCNX1    |
| AT5G15090 | ATVDAC3 | AT5G64290 | DCT       |
| AT5G15090 | ATVDAC3 | AT5G66680 | DGL1      |
| AT5G15090 | ATVDAC3 | AT5G67500 | ATVDAC2   |
| AT5G16590 | LRR1    | AT5G19760 |           |
| AT5G18380 |         | AT5G45750 | AtRABA1c  |
| AT5G18480 | PGSIP6  | AT5G25100 |           |
| AT5G18480 | PGSIP6  | AT5G27540 | emb2473   |
| AT5G18480 | PGSIP6  | AT5G52240 | AtMAPR5   |
| AT5G18800 |         | AT5G37510 | CI76      |
| AT5G18800 |         | AT5G52840 |           |
| AT5G18800 |         | AT5G66510 | GAMMA CA3 |
| AT5G18800 |         | ATMG00070 | NAD9      |
| AT5G19690 | STT3A   | AT5G40480 | EMB3012   |
| AT5G19760 |         | ATMG00220 | COB       |
| AT5G19760 |         | AT5G40810 |           |
| AT5G19760 |         | AT5G56730 |           |
| AT5G19760 |         | AT5G57110 | ACA8      |
| AT5G20490 | ATXIK   | AT5G47200 | ATRAB1A   |
| AT5G20660 |         | AT5G27540 | emb2473   |
| AT5G20660 |         | AT5G42590 | CYP71A16  |
| AT5G23300 | PYRD    | AT5G39410 |           |
| AT5G23300 | PYRD    | AT5G43970 | ATTOM22-V |
| AT5G23630 | MIA     | AT5G40480 | EMB3012   |
| AT5G25100 |         | AT5G52240 | AtMAPR5   |
| AT5G27540 | emb2473 | AT5G50460 |           |
| AT5G27540 | emb2473 | AT5G52240 | AtMAPR5   |
| AT5G27540 | emb2473 | ATMG00160 | COX2      |
| AT5G35460 |         | AT5G66680 | DGL1      |
| AT5G37510 | CI76    | AT5G40810 |           |
| AT5G37510 | CI76    | AT5G49760 |           |
| AT5G37510 | CI76    | AT5G51570 |           |
| AT5G37510 | CI76    | AT5G52840 |           |
| AT5G37510 | CI76    | AT5G57110 | ACA8      |
| AT5G37510 | CI76    | AT5G66510 | GAMMA CA3 |

|           |           |           |            |
|-----------|-----------|-----------|------------|
| AT5G37510 | CI76      | AT5G67590 | FRO1       |
| AT5G37510 | CI76      | ATMG00070 | NAD9       |
| AT5G39410 |           | AT5G43970 | ATTOM22-V  |
| AT5G40480 | EMB3012   | AT5G40890 | ATCLC-A    |
| AT5G40510 |           | AT5G42570 |            |
| AT5G40510 |           | AT5G56730 |            |
| AT5G40770 | ATPHB3    | AT5G46800 | BOU        |
| AT5G40770 | ATPHB3    | ATMG00270 | NAD6       |
| AT5G40810 |           | AT5G64030 |            |
| AT5G40810 |           | AT5G67590 | FRO1       |
| AT5G40810 |           | ATMG00070 | NAD9       |
| AT5G42150 |           | AT5G42650 | AOS        |
| AT5G42270 | FTSH5     | AT5G51220 |            |
| AT5G42570 |           | AT5G61790 | ATCNX1     |
| AT5G42570 |           | AT5G66680 | DGL1       |
| AT5G42790 | ARS5      | AT5G56500 | Cpn60beta3 |
| AT5G43010 | RPT4A     | AT5G58290 | RPT3       |
| AT5G46800 | BOU       | AT5G54100 |            |
| AT5G47890 |           | AT5G48000 | CYP708 A2  |
| AT5G47890 |           | AT5G66680 | DGL1       |
| AT5G47890 |           | AT5G67500 | ATVDAC2    |
| AT5G49760 |           | AT5G51570 |            |
| AT5G49760 |           | AT5G57110 | ACA8       |
| AT5G49760 |           | AT5G67590 | FRO1       |
| AT5G50460 |           | AT5G52240 | AtMAPR5    |
| AT5G50460 |           | ATMG00160 | COX2       |
| AT5G50650 |           | AT5G66680 | DGL1       |
| AT5G51570 |           | AT5G57110 | ACA8       |
| AT5G52240 | AtMAPR5   | ATMG00160 | COX2       |
| AT5G52840 |           | AT5G66510 | GAMMA CA3  |
| AT5G52840 |           | ATMG00070 | NAD9       |
| AT5G57490 | ATVDAC4   | AT5G66680 | DGL1       |
| AT5G58270 | ABCB25    | ATMG00160 | COX2       |
| AT5G61790 | ATCNX1    | AT5G66680 | DGL1       |
| AT5G61790 | ATCNX1    | AT5G67500 | ATVDAC2    |
| AT5G64290 | DCT       | AT5G66680 | DGL1       |
| AT5G64290 | DCT       | AT5G67500 | ATVDAC2    |
| AT5G66510 | GAMMA CA3 | ATMG00070 | NAD9       |
| AT5G66680 | DGL1      | AT5G67500 | ATVDAC2    |
| AT5G67590 | FRO1      | ATMG00070 | NAD9       |

**Table S2.** List of 965 Arabidopsis membrane genes analyzed for the interaction of their encoded protein [6] and used in this study to cluster root protoplasts and nuclei according to their transcriptional activities.

| Protein ID | Name | Mapman                                                     | DESCRIPTION                                           |
|------------|------|------------------------------------------------------------|-------------------------------------------------------|
| AT3G08580  | AAC1 | transport.metabolite transporters at the envelope membrane | AAC1 (ADP/ATP CARRIER 1); ATP:ADP antiporter/ binding |
| AT5G13490  | AAC2 | transport.unspecified cations                              | AAC2 (ADP/ATP carrier 2); ATP:ADP antiporter/ binding |

|           |        |                                                                 |                                                                                                                                                                 |
|-----------|--------|-----------------------------------------------------------------|-----------------------------------------------------------------------------------------------------------------------------------------------------------------|
| AT4G14070 | AAE15  | lipid metabolism.FA synthesis and FA elongation.acyl coa ligase | AAE15 (acyl-activating enzyme 15); long-chain-fatty-acid-[acyl-carrier-protein] ligase                                                                          |
| AT2G36910 | ABCB1  | transport.ABC transporters and multidrug resistance systems     | ABCB1 (ATP BINDING CASSETTE SUBFAMILY B1); ATPase, coupled to transmembrane movement of substances / auxin efflux transmembrane transporter/ calmodulin binding |
| AT3G28860 | ABCB19 | transport.ABC transporters and multidrug resistance systems     | ABCB19; ATPase, coupled to transmembrane movement of substances / auxin efflux transmembrane transporter                                                        |
| AT2G47000 | ABCB4  | transport.ABC transporters and multidrug resistance systems     | ABCB4 (ATP BINDING CASSETTE SUBFAMILY B4); ATPase, coupled to transmembrane movement of substances / xenobiotic-transporting ATPase                             |
| AT1G27770 | ACA1   | transport.calcium                                               | ACA1 (AUTO-INHIBITED CA2+-ATPASE 1); calcium channel/ calcium-transporting ATPase/ calmodulin binding                                                           |
| AT4G29900 | ACA10  | signalling.calcium                                              | ACA10 (AUTOINHIBITED CA(2+)-ATPASE 10); calcium-transporting ATPase/ calmodulin binding                                                                         |
| AT3G57330 | ACA11  | signalling.calcium                                              | ACA11 (autoinhibited Ca2+-ATPase 11); calcium-transporting ATPase/ calmodulin binding                                                                           |
| AT4G37640 | ACA2   | signalling.calcium                                              | ACA2 (CALCIUM ATPASE 2); calcium ion transmembrane transporter/ calcium-transporting ATPase/ calmodulin binding                                                 |
| AT2G41560 | ACA4   | signalling.calcium                                              | ACA4 (AUTO-INHIBITED CA(2+)-ATPASE, ISOFORM 4); calcium-transporting ATPase/ calmodulin binding                                                                 |
| AT5G57110 | ACA8   | transport.calcium                                               | ACA8 (AUTOINHIBITED CA2+ -ATPASE, ISOFORM 8); calcium-transporting ATPase/ calmodulin binding / protein self-association                                        |
| AT3G21180 | ACA9   | signalling.calcium                                              | ACA9 (AUTOINHIBITED CA(2+)-ATPASE 9); calcium-transporting ATPase/ calmodulin binding                                                                           |
| AT5G42080 | ADL1   | signalling.G-proteins                                           | ADL1 (ARABIDOPSIS DYNAMIN-LIKE PROTEIN); GTP binding / GTPase/ protein binding                                                                                  |
| AT1G14830 | ADL1C  | misc.dynamin                                                    | ADL1C (ARABIDOPSIS DYNAMIN-LIKE PROTEIN 1C); GTP binding / GTPase                                                                                               |
| AT3G60190 | ADL1E  | misc.dynamin                                                    | ADL1E (ARABIDOPSIS DYNAMIN-LIKE 1E); GTP binding / GTPase                                                                                                       |

|           |          |                                                                    |                                                                                                                                                                                       |
|-----------|----------|--------------------------------------------------------------------|---------------------------------------------------------------------------------------------------------------------------------------------------------------------------------------|
| AT1G59610 | ADL3     | misc.dynamin                                                       | ADL3 (ARABIDOPSIS DYNAMIN-LIKE 3); GTPase                                                                                                                                             |
| AT4G01100 | ADNT1    | transport.metabolite transporters at the mitochondrial membrane    | ADNT1 (ADENINE NUCLEOTIDE TRANSPORTER 1); ADP transmembrane transporter/ AMP transmembrane transporter/ ATP transmembrane transporter/ binding                                        |
| AT2G38960 | AERO2    | protein.targeting.secretory pathway.ER                             | AERO2 (Arabidopsis endoplasmic reticulum oxidoreductins 2); FAD binding / electron carrier/ oxidoreductase, acting on sulfur group of donors, disulfide as acceptor / protein binding |
| AT3G22942 | AGG2     | signalling.G-proteins                                              | AGG2 (G-PROTEIN GAMMA SUBUNIT 2)                                                                                                                                                      |
| AT1G28290 | AGP31    | stress.abiotic.unspecified                                         | AGP31 (arabinogalactan-protein 31)                                                                                                                                                    |
| AT2G18960 | AHA1     | transport.p- and v-ATPases.H+-exporting ATPase                     | AHA1 (ARABIDOPSIS H+ ATPASE 1); ATPase/ hydrogen-exporting ATPase, phosphorylative mechanism / protein binding                                                                        |
| AT4G30190 | AHA2     | transport.p- and v-ATPases.H+-exporting ATPase                     | AHA2; ATPase/ hydrogen-exporting ATPase, phosphorylative mechanism                                                                                                                    |
| AT5G57350 | AHA3     | transport.p- and v-ATPases.H+-exporting ATPase                     | AHA3; ATPase/ hydrogen-exporting ATPase, phosphorylative mechanism                                                                                                                    |
| AT3G60330 | AHA7     | transport.p- and v-ATPases                                         | AHA7 (Arabidopsis H(+)-ATPase 7); hydrogen-exporting ATPase, phosphorylative mechanism                                                                                                |
| AT5G04930 | ALA1     | transport.p- and v-ATPases                                         | ALA1 (aminophospholipid ATPase1); ATPase, coupled to transmembrane movement of ions, phosphorylative mechanism                                                                        |
| AT1G59820 | ALA3     | transport.p- and v-ATPases                                         | ALA3 (Aminophospholipid ATPase3); ATPase, coupled to transmembrane movement of ions, phosphorylative mechanism / phospholipid transporter                                             |
| AT3G66658 | ALDH22A1 | secondary metabolism.N misc.betaine.betaine-aldehyde dehydrogenase | ALDH22a1 (Aldehyde Dehydrogenase 22a1); 3-chloroallyl aldehyde dehydrogenase/ oxidoreductase                                                                                          |
| AT4G36250 | ALDH3F1  | fermentation.aldehyde dehydrogenase                                | ALDH3F1 (Aldehyde Dehydrogenase 3F1); 3-chloroallyl aldehyde dehydrogenase/ aldehyde dehydrogenase (NAD)                                                                              |
| AT1G44170 | ALDH3H1  | fermentation.aldehyde dehydrogenase                                | ALDH3H1 (ALDEHYDE DEHYDROGENASE 3H1); 3-chloroallyl aldehyde                                                                                                                          |

|           |             |                                                                                                   |                                                                                                                                                                                      |
|-----------|-------------|---------------------------------------------------------------------------------------------------|--------------------------------------------------------------------------------------------------------------------------------------------------------------------------------------|
| AT3G56190 | ALPHA-SNAP2 | protein.targeting.secretory pathway.unspecified                                                   | dehydrogenase/ aldehyde dehydrogenase (NAD) ALPHA-SNAP2 (ALPHA-SOLUBLE NSF ATTACHMENT PROTEIN 2); binding / soluble NSF attachment protein                                           |
| AT3G24300 | AMT1;3      | transport.ammonium                                                                                | AMT1;3 (AMMONIUM TRANSPORTER 1;3); ammonium transmembrane transporter                                                                                                                |
| AT2G38750 | ANNAT4      | cell.organisation                                                                                 | ANNAT4 (ANNEXIN ARABIDOPSIS 4); calcium ion binding / calcium-dependent phospholipid binding                                                                                         |
| AT3G25780 | AOC3        | hormone metabolism.jasmonate.synthesis-degradation.allene oxidase cyclase                         | AOC3 (ALLENE OXIDE CYCLASE 3); allene-oxide cyclase                                                                                                                                  |
| AT5G42650 | AOS         | hormone metabolism.jasmonate.synthesis-degradation.allene oxidase synthase                        | AOS (ALLENE OXIDE SYNTHASE); allene oxide synthase/ hydro-lyase/ oxygen binding                                                                                                      |
| AT3G22370 | AOX1A       | mitochondrial electron transport / ATP synthesis.alternative oxidase                              | AOX1A (ALTERNATIVE OXIDASE 1A); alternative oxidase                                                                                                                                  |
| AT4G35000 | APX3        | redox.ascorbate and glutathione.ascorbate                                                         | APX3 (ASCORBATE PEROXIDASE 3); L-ascorbate peroxidase                                                                                                                                |
| AT1G06400 | ARA-2       | signalling.G-proteins                                                                             | ARA-2; GTP binding                                                                                                                                                                   |
| AT2G43130 | ARA-4       | signalling.G-proteins                                                                             | ARA4; GTP binding / GTPase/ protein binding                                                                                                                                          |
| AT1G02130 | ARA-5       | signalling.G-proteins                                                                             | ARA-5 (ARABIDOPSIS RAS 5); GTP binding                                                                                                                                               |
| AT1G43170 | ARP1        | protein.synthesis.ribosomal protein.eukaryotic.60S subunit.L3                                     | ARP1 (ARABIDOPSIS RIBOSOMAL PROTEIN 1); structural constituent of ribosome                                                                                                           |
| AT1G47290 | 3BETAHSD/D1 | lipid metabolism.'exotics' (steroids, squalene etc).3-beta hydroxysteroid dehydrogenase/isomerase | AT3BETAHSD/D1 (3BETA-HYDROXYSTEROID-DEHYDROGENASE/DECARBOXYLASE ISOFORM 1); 3-beta-hydroxy-delta5-steroid dehydrogenase/sterol-4-alpha-carboxylate 3-dehydrogenase (decarboxylating) |
| AT4G01660 | ABC1        | mitochondrial electron transport / ATP synthesis.unspecified                                      | ATABC1 (ARABIDOPSIS THALIANA ABC TRANSPORTER 1); transporter                                                                                                                         |
| AT1G64780 | AMT1;2      | transport.ammonium                                                                                | ATAMT1;2 (AMMONIUM TRANSPORTER 1;2); ammonium transmembrane transporter                                                                                                              |
| AT5G67560 | ARLA1D      | protein.targeting.secretory pathway.unspecified                                                   | ATARLA1D (ADP-ribosylation factor-like A1D); GTP binding                                                                                                                             |
| AT5G62390 | ATBAG7      | signalling.calcium                                                                                | ATBAG7 (ARABIDOPSIS THALIANA BCL-2-ASSOCIATED ATHANOGENE 7); calmodulin binding                                                                                                      |

|           |          |                                                                                            |                                                                                                                                          |
|-----------|----------|--------------------------------------------------------------------------------------------|------------------------------------------------------------------------------------------------------------------------------------------|
| AT4G34490 | ATCAP1   | DNA.unspecified                                                                            | ATCAP1 (ARABIDOPSIS THALIANA CYCLASE ASSOCIATED PROTEIN 1); actin binding                                                                |
| AT3G18480 | AtCASP   | protein.targeting.secretory pathway.golgi                                                  | AtCASP (Arabidopsis thaliana CCAAT-displacement protein alternatively spliced product)                                                   |
| AT5G17770 | ATCBR    | redox.misc                                                                                 | ATCBR (ARABIDOPSIS THALIANA NADH:CYTOCHROME B5 REDUCTASE 1); cytochrome-b5 reductase                                                     |
| AT5G40890 | ATCLC-A  | transport.unspecified anions                                                               | ATCLC-A (CHLORIDE CHANNEL A); anion channel/ nitrate transmembrane transporter/ voltage-gated chloride channel                           |
| AT2G30920 | ATCOQ3   | Co-factor and vitamine metabolism.ubiquinone.hexaprenyldihydroxybenzoate methyltransferase | ATCOQ3 (ARABIDOPSIS THALIANA COENZYME Q 3); hexaprenyldihydroxybenzoate methyltransferase/ polyprenyldihydroxybenzoate methyltransferase |
| AT1G55850 | ATCSLE1  | cell wall.cellulose synthesis.cellulose synthase                                           | ATCSLE1; cellulose synthase/ transferase, transferring glycosyl groups                                                                   |
| AT5G23530 | AtCXE18  | Biodegradation of Xenobiotics                                                              | AtCXE18 (Arabidopsis thaliana carboxyesterase 18); carboxylesterase                                                                      |
| AT1G32210 | ATDAD1   | stress.biotic                                                                              | ATDAD1 (DEFENDER AGAINST APOPTOTIC DEATH 1)                                                                                              |
| AT1G79940 | ATERDJ2A | stress.abiotic.heat                                                                        | ATERDJ2A; heat shock protein binding / unfolded protein binding                                                                          |
| AT5G64440 | AtFAAH   | not assigned.no ontology                                                                   | AtFAAH (Arabidopsis thaliana fatty acid amide hydrolase); N-(long-chain-acyl)ethanolamine deacylase/ amidase                             |
| AT5G01600 | ATFER1   | metal handling.binding, chelation and storage                                              | ATFER1; ferric iron binding / iron ion binding                                                                                           |
| AT3G11730 | ATFP8    | signalling.G-proteins                                                                      | ATFP8; GTP binding / GTP-dependent protein binding / myosin XI tail binding                                                              |
| AT3G51830 | ATG5     | signalling.phosphoinositides                                                               | ATG5; phosphatidylinositol-4,5-bisphosphate 5-phosphatase                                                                                |
| AT4G35860 | ATGB2    | signalling.G-proteins                                                                      | ATGB2 (GTP-BINDING 2); GTP binding                                                                                                       |
| AT1G75680 | AtGH9B7  | misc.gluco-, galacto- and mannosidases.endoglucanase                                       | AtGH9B7 (Arabidopsis thaliana glycosyl hydrolase 9B7); catalytic/ hydrolase, hydrolyzing O-glycosyl compounds                            |
| AT3G47930 | ATGLDH   | redox.ascorbate and glutathione.ascorbate.L-Galactono-1,4-lactone dehydrogenase            | ATGLDH (L-GALACTONO-1,4-LACTONE DEHYDROGENASE); L-gulono-1,4-lactone dehydrogenase/ galactonolactone dehydrogenase                       |

|           |          |                                                                   |                                                                                                                                                           |
|-----------|----------|-------------------------------------------------------------------|-----------------------------------------------------------------------------------------------------------------------------------------------------------|
| AT3G63080 | ATGPX5   | redox.ascorbate and glutathione.glutathione                       | ATGPX5 (glutathione peroxidase 5); glutathione peroxidase                                                                                                 |
| AT3G17820 | ATGSKB6  | N-metabolism.ammonia metabolism.glutamine synthetase              | ATGSKB6; copper ion binding / glutamate-ammonia ligase                                                                                                    |
| AT4G03550 | ATGSL05  | minor CHO metabolism.callose                                      | ATGSL05 (GLUCAN SYNTHASE-LIKE 5); 1,3-beta-glucan synthase/transferase, transferring glycosyl groups                                                      |
| AT3G07160 | ATGSL10  | minor CHO metabolism.callose                                      | ATGSL10 (glucan synthase-like 10); 1,3-beta-glucan synthase                                                                                               |
| AT5G37600 | ATGLN1;1 | N-metabolism.ammonia metabolism.glutamine synthetase              | ATGSR1; copper ion binding / glutamate-ammonia ligase                                                                                                     |
| AT1G66200 | ATGSR2   | N-metabolism.ammonia metabolism.glutamine synthetase              | ATGSR2; copper ion binding / glutamate-ammonia ligase                                                                                                     |
| AT1G02950 | ATGSTF4  | misc.glutathione S transferases                                   | ATGSTF4 (GLUTATHIONE S-TRANSFERASE F4); glutathione transferase                                                                                           |
| AT3G08710 | ATH9     | redox.thioredoxin                                                 | ATH9 (thioredoxin H-type 9)                                                                                                                               |
| AT4G36480 | ATLCB1   | lipid metabolism.'exotics' (steroids, squalene etc).sphingolipids | ATLCB1 (LONG-CHAIN BASE1); protein binding / serine C-palmitoyltransferase                                                                                |
| AT5G54110 | ATMAMI   | cell.vesicle transport                                            | ATMAMI (ARABIDOPSIS THALIANA MEMBRANE-ASSOCIATED MANNITOL-INDUCED); structural molecule                                                                   |
| AT3G43300 | ATMIN7   | signalling.G-proteins                                             | ATMIN7 (ARABIDOPSIS THALIANA HOPM INTERACTOR 7); guanyl-nucleotide exchange factor/ protein binding                                                       |
| AT3G62700 | ABCC14   | transport.ABC transporters and multidrug resistance systems       | ATMRP10; ATPase, coupled to transmembrane movement of substances                                                                                          |
| AT2G34660 | ABCC2    | transport.ABC transporters and multidrug resistance systems       | ATMRP2 (ARABIDOPSIS THALIANA MULTIDRUG RESISTANCE-ASSOCIATED PROTEIN 2); ATPase, coupled to transmembrane movement of substances                          |
| AT2G47800 | ABCC4    | transport.ABC transporters and multidrug resistance systems       | ATMRP4 (ARABIDOPSIS THALIANA MULTIDRUG RESISTANCE-ASSOCIATED PROTEIN 4); ATPase, coupled to transmembrane movement of substances / folic acid transporter |
| AT1G15500 | ATNTT2   | transport.metabolite transporters at the mitochondrial membrane   | ATNTT2; ATP:ADP antiporter                                                                                                                                |
| AT4G00860 | ATOZI1   | stress                                                            | ATOZI1                                                                                                                                                    |
| AT2G43080 | AT-P4H-1 | misc.oxidases - copper, flavone etc                               | AT-P4H-1 (A. THALIANA P4H ISOFORM 1); oxidoreductase, acting on paired donors, with                                                                       |



|           |            |                                                                                                 |                                                                                                                                                                                                            |
|-----------|------------|-------------------------------------------------------------------------------------------------|------------------------------------------------------------------------------------------------------------------------------------------------------------------------------------------------------------|
|           |            |                                                                                                 | incorporation or reduction of molecular oxygen, 2-oxoglutarate as one donor, and incorporation of one atom each of oxygen into both donors / procollagen-proline 4-dioxygen                                |
| AT5G13640 | ATPDAT     | lipid metabolism.'exotics' (steroids, squalene etc).phosphatidylcholinesterol O-acyltransferase | ATPDAT; phosphatidylcholine-sterol O-acyltransferase                                                                                                                                                       |
| AT2G32920 | ATPDIL9    | redox.thioredoxin.PDIL                                                                          | ATPDIL2-3 (PDI-LIKE 2-3); protein disulfide isomerase                                                                                                                                                      |
| AT1G35620 | ATPDIL8    | redox.thioredoxin.PDIL                                                                          | ATPDIL5-2 (PDI-LIKE 5-2); protein disulfide isomerase                                                                                                                                                      |
| AT4G28510 | ATPHB1     | mitochondrial electron transport / ATP synthesis.NADH-DH.complex I                              | ATPHB1 (PROHIBITIN 1)                                                                                                                                                                                      |
| AT1G03860 | ATPHB2     | cell.cycle                                                                                      | ATPHB2 (PROHIBITIN 2)                                                                                                                                                                                      |
| AT5G40770 | ATPHB3     | cell.division                                                                                   | ATPHB3 (PROHIBITIN 3)                                                                                                                                                                                      |
| AT3G27280 | ATPHB4     | cell.division                                                                                   | ATPHB4 (PROHIBITIN 4)                                                                                                                                                                                      |
| AT2G20530 | ATPHB6     | mitochondrial electron transport / ATP synthesis.NADH-DH.complex I                              | ATPHB6 (PROHIBITIN 6)                                                                                                                                                                                      |
| AT3G08510 | ATPLC2     | signalling.phosphoinositides.phosphoinositide phospholipase C                                   | ATPLC2 (PHOSPHOLIPASE C 2); phospholipase C                                                                                                                                                                |
| AT4G35790 | ATPLDDELTA | lipid metabolism.lipid degradation.lysophospholipases.phospholipase D                           | ATPLDDELTA; phospholipase D                                                                                                                                                                                |
| AT3G52300 | ATPQ       | mitochondrial electron transport / ATP synthesis.F1-ATPase                                      | ATPQ (ATP SYNTHASE D CHAIN, MITOCHONDRIAL); hydrogen ion transmembrane transporter                                                                                                                         |
| AT2G38940 | ATPT2      | transport.phosphate                                                                             | ATPT2 (ARABIDOPSIS THALIANA PHOSPHATE TRANSPORTER 2); carbohydrate transmembrane transporter/ inorganic phosphate transmembrane transporter/ phosphate transmembrane transporter/ sugar:hydrogen symporter |
| AT4G24520 | AR1        | misc.cytochrome P450                                                                            | ATR1 (ARABIDOPSIS P450 REDUCTASE 1); NADPH-hemoprotein reductase                                                                                                                                           |
| AT4G30210 | AR2        | misc.cytochrome P450                                                                            | ATR2 (ARABIDOPSIS P450 REDUCTASE 2); NADPH-hemoprotein reductase                                                                                                                                           |
| AT1G09630 | ATRAB-A2A  | signalling.G-proteins                                                                           | ATRAB11C (ARABIDOPSIS RAB GTPASE 11C); GTP binding                                                                                                                                                         |

|           |           |                                                               |                                                                                              |
|-----------|-----------|---------------------------------------------------------------|----------------------------------------------------------------------------------------------|
| AT1G43890 | ATRAB-C1  | signalling.G-proteins                                         | ATRAB18 (ARABIDOPSIS RAB GTPASE HOMOLOG B18); GTP binding                                    |
| AT5G47200 | ATRAB1A   | signalling.G-proteins                                         | ATRAB1A; GTP binding                                                                         |
| AT2G21880 | ATRAB7A   | signalling.G-proteins                                         | ATRAB7A; GTP binding                                                                         |
| AT3G18820 | ATRAB7B   | signalling.G-proteins                                         | ATRAB7B (ARABIDOPSIS RAB GTPASE HOMOLOG G3F); GTP binding                                    |
| AT3G53610 | ATRAB8    | signalling.G-proteins                                         | ATRAB8; GTP binding                                                                          |
| AT3G46060 | ARA-3     | signalling.G-proteins                                         | ATRAB8A; GTP binding                                                                         |
| AT5G03520 | ATRAB-E1D | signalling.G-proteins                                         | ATRAB8C; GTP binding                                                                         |
| AT1G16920 | ATRABA1B  | signalling.G-proteins                                         | ATRABA1B (ARABIDOPSIS RAB GTPASE HOMOLOG A1B); GTP binding                                   |
| AT5G45750 | AtRABA1c  | signalling.G-proteins                                         | AtRABA1c (Arabidopsis Rab GTPase homolog A1c); GTP binding                                   |
| AT4G18800 | ATHSGBP   | signalling.G-proteins                                         | ATRABA1D (ARABIDOPSIS RAB GTPASE HOMOLOG A1D); GTP binding                                   |
| AT4G18430 | AtRABA1e  | signalling.G-proteins                                         | AtRABA1e (Arabidopsis Rab GTPase homolog A1e); GTP binding                                   |
| AT5G59150 | ATRAB-A2D | signalling.G-proteins                                         | ATRABA2D (HOARABIDOPSIS RAB GTPASE HOMOLOG A2D); GTP binding                                 |
| AT2G21600 | ATRER1B   | protein.targeting.secretory pathway.ER                        | ATRER1B                                                                                      |
| AT1G28340 | AtRLP4    | not assigned.no ontology                                      | AtRLP4 (Receptor Like Protein 4); protein binding                                            |
| AT2G37270 | ATRPS5B   | protein.synthesis.ribosomal protein.eukaryotic.40S subunit.S5 | ATRPS5B (RIBOSOMAL PROTEIN 5B); structural constituent of ribosome                           |
| AT4G30580 | ATS2      | development.unspecified                                       | ATS2; 1-acylglycerol-3-phosphate O-acyltransferase/ acyltransferase                          |
| AT1G56330 | ATSAR1    | signalling.G-proteins                                         | ATSAR1B (SECRETION-ASSOCIATED RAS 1 B); GTP binding                                          |
| AT4G01320 | ATSTE24   | protein.degradation                                           | ATSTE24; endopeptidase/ metalloendopeptidase                                                 |
| AT5G39040 | ABCB27    | transport.ABC transporters and multidrug resistance systems   | ATTAP2; ATPase, coupled to transmembrane movement of substances / transporter                |
| AT3G20050 | ATTCP-1   | protein.folding                                               | ATTCP-1; ATP binding / protein binding / unfolded protein binding                            |
| AT1G72750 | ATTIM23-2 | protein.targeting.mitochondria                                | ATTIM23-2; P-P-bond-hydrolysis-driven protein transmembrane transporter/ protein transporter |

|           |           |                                                                                     |                                                                                                                                     |
|-----------|-----------|-------------------------------------------------------------------------------------|-------------------------------------------------------------------------------------------------------------------------------------|
| AT2G36070 | ATTIM44-2 | protein.targeting.mitochondria                                                      | ATTIM44-2; protein-transmembrane transporting ATPase                                                                                |
| AT4G03560 | ATCCH1    | transport.calcium                                                                   | ATTPC1 (TWO-PORE CHANNEL 1); calcium channel/ voltage-gated calcium channel                                                         |
| AT5G39950 | ATH2      | redox.thioredoxin                                                                   | ATTRX2 (THIOREDOXIN 2); oxidoreductase, acting on sulfur group of donors, disulfide as acceptor                                     |
| AT5G22360 | ATVAMP714 | cell.vesicle transport                                                              | ATVAMP714 (VESICLE-ASSOCIATED MEMBRANE PROTEIN 714)                                                                                 |
| AT3G54300 | ATVAMP727 | cell.vesicle transport                                                              | ATVAMP727 (VESICLE-ASSOCIATED MEMBRANE PROTEIN 727)                                                                                 |
| AT4G38920 | ATVHA-C3  | transport.p- and v-ATPases.H+-transporting two-sector ATPase.subunit C              | ATVHA-C3 (VACUOLAR-TYPE H(+)-ATPASE C3); ATPase                                                                                     |
| AT2G05170 | ATVPS11   | protein.targeting.secretory pathway.vacuole                                         | ATVPS11; binding / protein binding / transporter/ zinc ion binding                                                                  |
| AT2G14740 | ATVSR3    | protein.targeting.secretory pathway.vacuole                                         | ATVSR3 (ARABIDOPSIS THALIANA VACUOLAR SORTING RECEPTOR 3); calcium ion binding                                                      |
| AT3G62830 | ATUXS2    | cell wall.precursor synthesis.UXS                                                   | AUD1; UDP-glucuronate decarboxylase/ catalytic/ dTDP-glucose 4,6-dehydratase                                                        |
| AT2G38120 | AUX1      | transport.misc                                                                      | AUX1 (AUXIN RESISTANT 1); amino acid transmembrane transporter/ auxin binding / auxin influx transmembrane transporter/ transporter |
| AT1G15690 | ATAVP3    | transport.H+ transporting pyrophosphatase                                           | AVP1; ATPase/ hydrogen-translocating pyrophosphatase                                                                                |
| AT1G78920 | AtVHP2;1  | transport.H+ transporting pyrophosphatase                                           | AVP2 (ARABIDOPSIS VACUOLAR H+-PYROPHOSPHATASE 2); hydrogen-translocating pyrophosphatase                                            |
| AT1G54990 | AXR4      | not assigned.unknown                                                                | AXR4 (AUXIN RESISTANT 4)                                                                                                            |
| AT4G33430 | ATBAK1    | signalling.receptor kinases.leucine rich repeat.brassinosteroid signaling.SERK.BAK1 | BAK1 (BRI1-ASSOCIATED RECEPTOR KINASE); kinase/ protein binding / protein heterodimerization/ protein serine/threonine kinase       |
| AT5G64370 | BETA-UP   | nucleotide metabolism.degradation.pyrimidine.beta-ureidopropionase                  | BETA-UP (beta-ureidopropionase); beta-ureidopropionase                                                                              |
| AT3G02260 | ASA1      | hormone metabolism.auxin.signal transduction                                        | BIG (BIG); binding / ubiquitin-protein ligase/ zinc ion binding                                                                     |

|           |         |                                                                        |                                                                                                       |
|-----------|---------|------------------------------------------------------------------------|-------------------------------------------------------------------------------------------------------|
| AT5G61900 | BON     | signalling.calcium                                                     | BON1 (BONZAI 1); calcium-dependent phospholipid binding                                               |
| AT5G46800 | BOU     | transport.metabolite transporters at the mitochondrial membrane        | BOU (A BOUT DE SOUFFLE); binding / transporter                                                        |
| AT5G16840 | BPA1    | RNA.RNA binding                                                        | BPA1 (BINDINGPARTNEROFACD11 1); nucleic acid binding / nucleotide binding / oxidoreductase            |
| AT4G35230 | BSK1    | signalling.kinase.RLCK.brassinosteroid signalling kinase               | BSK1 (BR-SIGNALING KINASE 1); ATP binding / binding / kinase/ protein kinase/ protein tyrosine kinase |
| AT4G00710 | BSK3    | signalling.kinase.RLCK.brassinosteroid signalling kinase               | BSK3 (BR-SIGNALING KINASE 3); ATP binding / binding / kinase/ protein kinase/ protein tyrosine kinase |
| AT4G23630 | BTI1    | stress.biotic                                                          | BTI1 (VIRB2-INTERACTING PROTEIN 1)                                                                    |
| AT4G11220 | BTI2    | not assigned.no ontology                                               | BTI2 (VIRB2-INTERACTING PROTEIN 2)                                                                    |
| AT5G41600 | BTI3    | not assigned.no ontology                                               | BTI3 (VIRB2-INTERACTING PROTEIN 3)                                                                    |
| AT2G30490 | ATC4H   | secondary metabolism.phenylpropanoids.lignin biosynthesis.C4H          | C4H (CINNAMATE-4-HYDROXYLASE); trans-cinnamate 4-monooxygenase                                        |
| AT1G29930 | AB140   | PS.lightreaction.photosystem II.LHC-II                                 | CAB1 (CHLOROPHYLL A/B BINDING PROTEIN 1); chlorophyll binding                                         |
| AT1G07670 | ATECA4  | transport.calcium                                                      | calcium-transporting ATPase                                                                           |
| AT5G61790 | ATCNX1  | signalling.calcium                                                     | calnexin 1 (CNX1)                                                                                     |
| AT1G05570 | ATGSL06 | minor CHO metabolism.callose                                           | CALS1 (CALLOSE SYNTHASE 1); 1,3-beta-glucan synthase/ transferase, transferring glycosyl groups       |
| AT2G07050 | CAS1    | hormone metabolism.brassinosteroid.synthesis-degradation.sterols.other | CAS1 (cycloartenol synthase 1); cycloartenol synthase                                                 |
| AT1G05940 | CAT9    | transport.amino acids                                                  | CAT9 (CATIONIC AMINO ACID TRANSPORTER 9); cationic amino acid transmembrane transporter               |
| AT1G26340 | ATCB5-A | redox.ascorbate and glutathione                                        | CB5-A (CYTOCHROME B5 ISOFORM A); heme binding                                                         |
| AT2G32720 | ATCB5-B | redox.ascorbate and glutathione                                        | CB5-B (CYTOCHROME B5 ISOFORM B); heme binding                                                         |
| AT2G46650 | ATCB5-C | redox.ascorbate and glutathione                                        | CB5-C (CYTOCHROME B5 ISOFORM C); heme binding                                                         |
| AT5G48810 | ATB5-B  | redox.ascorbate and glutathione                                        | CB5-D (CYTOCHROME B5 ISOFORM D); heme binding                                                         |
| AT5G53560 | ATB5-A  | redox.misc                                                             | CB5-E (CYTOCHROME B5 ISOFORM E); heme binding                                                         |

|           |         |                                                                                                       |                                                                                                                                                                                         |
|-----------|---------|-------------------------------------------------------------------------------------------------------|-----------------------------------------------------------------------------------------------------------------------------------------------------------------------------------------|
| AT1G30450 | ATCCC1  | transport.unspecified anions                                                                          | CCC1 (CATION-CHLORIDE CO-TRANSPORTER 1); cation:chloride symporter/<br>sodium:potassium:chloride symporter                                                                              |
| AT3G63520 | ATCCD1  | secondary metabolism.isoprenoids.carotenoids.carotenoid cleavage dioxygenase                          | CCD1 (CAROTENOID CLEAVAGE DIOXYGENASE 1); 9-cis-epoxycarotenoid dioxygenase                                                                                                             |
| AT3G09840 | ATCDC48 | cell.division                                                                                         | CDC48 (CELL DIVISION CYCLE 48); ATPase/ identical protein binding CDPK19 (CALCIUM-DEPENDENT PROTEIN KINASE 19); ATP binding /                                                           |
| AT5G19450 | CDPK19  | signalling.calcium.calcium dependent protein kinases                                                  | calcium ion binding / calmodulin-dependent protein kinase/ kinase/ protein kinase/ protein serine/threonine kinase                                                                      |
| AT3G55360 | ATTSC13 | lipid metabolism.'exotics' (steroids, squalene etc).trans-2-enoyl-CoA reductase (NADPH)               | CER10; 3-oxo-5-alpha-steroid 4-dehydrogenase/ fatty acid elongase/ trans-2-enoyl-CoA reductase (NADPH)                                                                                  |
| AT3G21630 | CERK1   | signalling.receptor kinases.leucine rich repeat IX                                                    | CERK1 (CHITIN ELICITOR RECEPTOR KINASE 1); kinase/ receptor signaling protein/ transmembrane receptor protein kinase                                                                    |
| AT4G32410 | AtCESA1 | cell wall.cellulose synthesis.cellulose synthase                                                      | CESA1 (CELLULOSE SYNTHASE 1); cellulose synthase/ transferase, transferring glycosyl groups                                                                                             |
| AT5G05170 | ATCESA3 | cell wall.cellulose synthesis.cellulose synthase                                                      | CEV1 (CONSTITUTIVE EXPRESSION OF VSP 1); cellulose synthase/ transferase, transferring glycosyl groups                                                                                  |
| AT4G38240 | CGL     | protein.glycosylation.alpha-1,3-mannosyl-glycoprotein-beta-1,2-N-acetylglucosaminyltransferase(GnT I) | CGL1 (COMPLEX GLYCAN LESS 1); alpha-1,3-mannosylglycoprotein 2-beta-N-acetylglucosaminyltransferase/ protein N-acetylglucosaminyltransferase/ transferase, transferring glycosyl groups |
| ATCG00480 | ATPB    | PS.lightreaction.ATP synthase.beta subunit                                                            | chloroplast-encoded gene for beta subunit of ATP synthase cholinephosphate                                                                                                              |
| AT2G32260 | ATCCT1  | lipid metabolism.Phospholipid synthesis.choline-phosphate cytidylyltransferase                        | cytidylyltransferase, putative / phosphorylcholine transferase, putative / CTP:phosphocholine cytidylyltransferase, putative                                                            |
| AT5G08530 | CI51    | mitochondrial electron transport / ATP synthesis.NADH-DH.localisation not clear                       | CI51 (51 kDa subunit of complex I); 4 iron, 4 sulfur cluster binding / FMN binding / NAD or NADH binding / NADH dehydrogenase                                                           |

|           |           |                                                                        |                                                                                                                                               |
|-----------|-----------|------------------------------------------------------------------------|-----------------------------------------------------------------------------------------------------------------------------------------------|
| AT4G24400 | ATCIPK8   | signalling.calcium.CBL interacting kinase/SnRK3                        | (ubiquinone)/ oxidoreductase, acting on NADH or NADPH CIPK8 (CBL-INTERACTING PROTEIN KINASE 8); kinase/ protein kinase                        |
| AT5G49890 | ATCLC-C   | transport.unspecified anions                                           | CLC-C (CHLORIDE CHANNEL C); anion channel/ voltage-gated chloride channel                                                                     |
| AT2G20120 | COV1      | hormone metabolism.auxin.induced-regulated-responsive-activated        | COV1 (CONTINUOUS VASCULAR RING)                                                                                                               |
| AT5G56090 | COX15     | protein.aa activation                                                  | COX15 (cytochrome c oxidase 15)                                                                                                               |
| AT3G57530 | ATCPK32   | signalling.calcium.calcium dependent protein kinases                   | CPK32 (CALCIUM-DEPENDENT PROTEIN KINASE 32); calcium-dependent protein kinase C/ calmodulin-dependent protein kinase/ kinase/ protein binding |
| AT2G28000 | CH-CPN60A | PS.calvin cycle.rubisco interacting                                    | CPN60A (CHAPERONIN-60ALPHA); ATP binding / protein binding                                                                                    |
| AT1G55490 | CPN60B    | PS.calvin cycle.rubisco interacting                                    | CPN60B (CHAPERONIN 60 BETA); ATP binding / protein binding                                                                                    |
| AT3G03050 | ATCSLD3   | cell wall.cellulose synthesis.cellulose synthase                       | CSLD3 (CELLULOSE SYNTHASE-LIKE D3); cellulose synthase/ transferase, transferring glycosyl groups                                             |
| AT1G11680 | CYP51     | hormone metabolism.brassinosteroid.synthesis-degradation.sterols.CYP51 | CYP51G1 (CYTOCHROME P450 51G1); oxygen binding / sterol 14-demethylase                                                                        |
| AT2G45510 | CYP704A2  | misc.cytochrome P450                                                   | CYP704A2; electron carrier/ heme binding / iron ion binding / monooxygenase/ oxygen binding                                                   |
| AT4G15330 | CYP705A1  | misc.cytochrome P450                                                   | CYP705A1; electron carrier/ heme binding / iron ion binding / monooxygenase/ oxygen binding                                                   |
| AT5G42580 | CYP705A12 | misc.cytochrome P450                                                   | CYP705A12; electron carrier/ heme binding / iron ion binding / monooxygenase/ oxygen binding                                                  |
| AT3G20940 | CYP705A30 | misc.cytochrome P450                                                   | CYP705A30; electron carrier/ heme binding / iron ion binding / monooxygenase/ oxygen binding                                                  |
| AT3G20960 | CYP705A33 | misc.cytochrome P450                                                   | CYP705A33; electron carrier/ heme binding / iron ion binding / monooxygenase/ oxygen binding                                                  |
| AT5G47990 | CYP705A5  | misc.cytochrome P450                                                   | CYP705A5; oxygen binding / thalian-diol desaturase                                                                                            |
| AT5G48000 | CYP708A2  | misc.cytochrome P450                                                   | CYP708A2; oxygen binding / thalianol hydroxylase                                                                                              |
| AT2G28860 | CYP710A4  | misc.cytochrome P450                                                   | CYP710A4 (cytochrome P450, family 710, subfamily A, polypeptide 4); electron carrier/                                                         |

|           |          |                      |                                                                                                                                                                                                                    |
|-----------|----------|----------------------|--------------------------------------------------------------------------------------------------------------------------------------------------------------------------------------------------------------------|
| AT5G42590 | CYP71A16 | misc.cytochrome P450 | heme binding / iron ion binding / monooxygenase/ oxygen binding CYP71A16; electron carrier/ heme binding / iron ion binding / monooxygenase/ oxygen binding                                                        |
| AT1G13080 | CYP71B2  | misc.cytochrome P450 | CYP71B2 (CYTOCHROME P450 71B2); electron carrier/ heme binding / iron ion binding / monooxygenase/ oxygen binding                                                                                                  |
| AT3G26210 | CYP71B23 | misc.cytochrome P450 | CYP71B23; electron carrier/ heme binding / iron ion binding / monooxygenase/ oxygen binding                                                                                                                        |
| AT3G26330 | CYP71B37 | misc.cytochrome P450 | CYP71B37; electron carrier/ heme binding / iron ion binding / monooxygenase/ oxygen binding                                                                                                                        |
| AT2G24180 | CYP71B6  | misc.cytochrome P450 | CYP71B6 (CYTOCHROME P450 71B6); electron carrier/ heme binding / iron ion binding / monooxygenase/ oxygen binding                                                                                                  |
| AT1G13110 | CYP71B7  | misc.cytochrome P450 | CYP71B7; electron carrier/ heme binding / iron ion binding / monooxygenase/ oxygen binding                                                                                                                         |
| AT1G75130 | CYP721A1 | misc.cytochrome P450 | CYP721A1; electron carrier/ heme binding / iron ion binding / monooxygenase/ oxygen binding                                                                                                                        |
| AT3G14680 | CYP72A14 | misc.cytochrome P450 | CYP72A14; electron carrier/ heme binding / iron ion binding / monooxygenase/ oxygen binding                                                                                                                        |
| AT3G14610 | CYP72A7  | misc.cytochrome P450 | CYP72A7; electron carrier/ heme binding / iron ion binding / monooxygenase/ oxygen binding                                                                                                                         |
| AT1G16400 | CYP79F2  | misc.cytochrome P450 | CYP79F2; oxidoreductase, acting on paired donors, with incorporation or reduction of molecular oxygen, NADH or NADPH as one donor, and incorporation of one atom of oxygen / oxygen binding                        |
| AT5G36220 | CYP81D1  | misc.cytochrome P450 | CYP81D1 (CYTOCHROME P450 81D1); electron carrier/ heme binding / iron ion binding / monooxygenase/ oxygen binding                                                                                                  |
| AT2G25160 | CYP82F1  | misc.cytochrome P450 | CYP82F1; electron carrier/ heme binding / iron ion binding / monooxygenase/ oxygen binding                                                                                                                         |
| AT4G13770 | CYP83A1  | misc.cytochrome P450 | CYP83A1 (CYTOCHROME P450 83A1); oxidoreductase, acting on paired donors, with incorporation or reduction of molecular oxygen, NADH or NADPH as one donor, and incorporation of one atom of oxygen / oxygen binding |

|           |         |                                                                       |                                                                                                                                                                                                                                  |
|-----------|---------|-----------------------------------------------------------------------|----------------------------------------------------------------------------------------------------------------------------------------------------------------------------------------------------------------------------------|
| AT4G31500 | ATR4    | misc.cytochrome P450                                                  | CYP83B1 (CYTOCHROME P450 MONOOXYGENASE 83B1); oxidoreductase, acting on paired donors, with incorporation or reduction of molecular oxygen, NADH or NADPH as one donor, and incorporation of one atom of oxygen / oxygen binding |
| AT2G40890 | CYP98A3 | secondary metabolism.phenylpropanoids.lignin biosynthesis.C3H         | CYP98A3 (cytochrome P450, family 98, subfamily A, polypeptide 3); monooxygenase/ p-coumarate 3-hydroxylase                                                                                                                       |
| ATMG00160 | COX2    | mitochondrial electron transport / ATP synthesis.cytochrome c oxidase | cytochrome c oxidase subunit 2                                                                                                                                                                                                   |
| AT4G29330 | DER1    | protein.degradation                                                   | DER1 (DERLIN-1)                                                                                                                                                                                                                  |
| AT3G09090 | DEX1    | development.unspecified                                               | DEX1 (DEFECTIVE IN EXINE FORMATION 1); calcium ion binding                                                                                                                                                                       |
| AT4G00550 | DGD2    | lipid metabolism.glycolipid synthesis.DGDG synthase                   | DGD2; UDP-galactosyltransferase/ UDP-glycosyltransferase/ digalactosyldiacylglycerol synthase/ transferase, transferring glycosyl groups                                                                                         |
| AT5G66680 | DGL1    | protein.glycosylation                                                 | DGL1; dolichyl-diphosphooligosaccharide-protein glycotransferase                                                                                                                                                                 |
| AT5G12290 | DGS1    | not assigned.no ontology                                              | DGS1 (DGD1 SUPPRESSOR 1)                                                                                                                                                                                                         |
| AT2G18730 | ATDGK3  | lipid metabolism.Phospholipid synthesis.diacylglycerol kinase         | diacylglycerol kinase, putative                                                                                                                                                                                                  |
| AT5G64290 | DCT     | transport.metabolite transporters at the mitochondrial membrane       | DIT2.1 (DICARBOXYLATE TRANSPORT 2.1); oxoglutarate:malate antiporter                                                                                                                                                             |
| AT1G27980 | ATDPL1  | lipid metabolism.'exotics' (steroids, squalene etc).sphingolipids     | DPL1; carboxy-lyase/ catalytic/ pyridoxal phosphate binding                                                                                                                                                                      |
| AT4G20260 | ATPCAP1 | signalling.phosphoinositides                                          | DREPP plasma membrane polypeptide family protein                                                                                                                                                                                 |
| AT4G33650 | ADL2    | misc.dynamamin                                                        | DRP3A (DYNAMIN-RELATED PROTEIN 3A); GTP binding / GTPase/ phosphoinositide binding                                                                                                                                               |
| AT3G19820 | CBB1    | hormone metabolism.brassinosteroid.synthesis-degradation.sterols.DWF1 | DWF1 (DWARF 1); calmodulin binding / catalytic                                                                                                                                                                                   |
| AT2G14120 | DRP3B   | misc.dynamamin                                                        | dynamamin-like protein 2b (ADL2b)                                                                                                                                                                                                |
| AT1G07810 | ACA3    | transport.calcium                                                     | ECA1 (ER-TYPE CA2+ -ATPASE 1); calcium-transporting ATPase                                                                                                                                                                       |
| AT4G00900 | ATECA2  | transport.calcium                                                     | ECA2 (ER-TYPE CA2+ -ATPASE 2); calcium-transporting ATPase                                                                                                                                                                       |



|           |           |                                                                                                                       |                                                                                                                                                                                               |
|-----------|-----------|-----------------------------------------------------------------------------------------------------------------------|-----------------------------------------------------------------------------------------------------------------------------------------------------------------------------------------------|
| AT1G10130 | ATECA3    | transport.calcium                                                                                                     | ECA3 (ENDOPLASMIC RETICULUM-TYPE CALCIUM-TRANSPORTING ATPASE 3); calcium-transporting ATPase/ calmodulin binding / manganese-transporting ATPase/ peroxidase                                  |
| AT1G01960 | EDA10     | signalling.G-proteins                                                                                                 | EDA10 (embryo sac development arrest 10); ARF guanyl-nucleotide exchange factor/ binding / guanyl-nucleotide exchange factor                                                                  |
| AT3G56150 | ATEIF3C-1 | protein.synthesis.initiation                                                                                          | EIF3C (EUKARYOTIC TRANSLATION INITIATION FACTOR 3C); translation initiation factor                                                                                                            |
| AT3G57290 | ATEIF3E-1 | protein.synthesis.initiation                                                                                          | EIF3E (EUKARYOTIC TRANSLATION INITIATION FACTOR 3E); translation initiation factor                                                                                                            |
| AT5G37510 | CI76      | mitochondrial electron transport / ATP synthesis.NADH-DH.localisation not clear                                       | EMB1467 (embryo defective 1467); NADH dehydrogenase (ubiquinone)/ NADH dehydrogenase/ electron carrier/ iron-sulfur cluster binding / oxidoreductase/ oxidoreductase, acting on NADH or NADPH |
| AT1G10510 | emb2004   | development.unspecified                                                                                               | emb2004 (embryo defective 2004)                                                                                                                                                               |
| AT5G09900 | EMB2107   | protein.degradation.ubiquitin.proteasom                                                                               | EMB2107 (EMBRYO DEFECTIVE 2107)                                                                                                                                                               |
| AT3G04400 | emb2171   | protein.synthesis.ribosomal protein.eukaryotic.60S subunit.L23                                                        | emb2171 (embryo defective 2171); structural constituent of ribosome                                                                                                                           |
| AT1G20200 | EMB2719   | protein.degradation.ubiquitin.proteasom                                                                               | EMB2719 (EMBRYO DEFECTIVE 2719); enzyme regulator                                                                                                                                             |
| AT5G55940 | emb2731   | development.unspecified                                                                                               | emb2731 (embryo defective 2731)                                                                                                                                                               |
| AT1G80410 | EMB2753   | misc.acyl transferases                                                                                                | EMB2753 (EMBRYO DEFECTIVE 2753); binding                                                                                                                                                      |
| AT4G36630 | EMB2754   | not assigned.unknown                                                                                                  | EMB2754 (EMBRYO DEFECTIVE 2754); binding / small GTPase regulator                                                                                                                             |
| AT1G34430 | EMB3003   | TCA / org transformation.TCA.pyruvate DH.E2                                                                           | EMB3003 (embryo defective 3003); acyltransferase/ dihydrolipoyllysine-residue acetyltransferase/ protein binding                                                                              |
| AT5G40480 | EMB3012   | protein.targeting.nucleus                                                                                             | EMB3012 (embryo defective 3012)                                                                                                                                                               |
| ATMG00480 | ATP8      | mitochondrial electron transport / ATP synthesis.F1-ATPase                                                            | Encodes subunit 8 of the mitochondrial F(O) ATP synthase complex.                                                                                                                             |
| ATCG00500 | ACCD      | lipid metabolism.FA synthesis and FA elongation.Acetyl CoA Carboxylation.heteromeric Complex.beta Carboxyltransferase | Encodes the carboxytransferase beta subunit of the Acetyl-CoA carboxylase (ACCase) complex in plastids. This complex catalyzes the                                                            |

|           |           |                                                                                                 |                                                                                                                                                                                                                                                                                                |
|-----------|-----------|-------------------------------------------------------------------------------------------------|------------------------------------------------------------------------------------------------------------------------------------------------------------------------------------------------------------------------------------------------------------------------------------------------|
| AT1G30360 | ERD4      | stress.abiotic.drought/salt                                                                     | carboxylation of acetyl-CoA to produce malonyl-CoA, the first committed step in fatty acid synthesis.<br>ERD4 (early-responsive to dehydration 4)<br>ERD6 (EARLY RESPONSE TO DEHYDRATION 6); carbohydrate transmembrane transporter/ sugar transmembrane transporter/ sugar:hydrogen symporter |
| AT1G08930 | ERD6      | transport.sugars                                                                                | ERD7 (EARLY-RESPONSIVE TO DEHYDRATION 7)                                                                                                                                                                                                                                                       |
| AT2G17840 | ERD7      | development.unspecified                                                                         | ETFQO (electron-transfer flavoprotein:ubiquinone oxidoreductase); catalytic/ electron carrier/ electron-transferring-flavoprotein dehydrogenase                                                                                                                                                |
| AT2G43400 | ETFQO     | mitochondrial electron transport / ATP synthesis.electron transfer flavoprotein                 | EXL2 (EXORDIUM LIKE 2)<br>FC1 (ferrochelataase 1); ferrochelataase                                                                                                                                                                                                                             |
| AT5G64260 | EXL2      | signalling.in sugar and nutrient physiology                                                     | FCLY (FARNESYL CYSTEINE LYASE); prenylcysteine oxidase                                                                                                                                                                                                                                         |
| AT5G26030 | ATFC-I    | tetrapyrrole synthesis.ferrochelataase                                                          | FER (FERONIA); kinase/ protein kinase                                                                                                                                                                                                                                                          |
| AT5G63910 | FCLY      | not assigned.unknown                                                                            | FIB2 (FIBRILLARIN 2); snoRNA binding                                                                                                                                                                                                                                                           |
| AT3G51550 | FER       | signalling.receptor kinases.Catharanthus roseus-like RLK1                                       | FRO1 (FROSTBITE1); NADH dehydrogenase (ubiquinone)                                                                                                                                                                                                                                             |
| AT4G25630 | ATFIB2    | protein.synthesis.ribosome biogenesis.Pre-rRNA processing and modifications.methylotransferases | FRO4 (FERRIC REDUCTION OXIDASE 4); ferric-chelate reductase                                                                                                                                                                                                                                    |
| AT5G67590 | FRO1      | mitochondrial electron transport / ATP synthesis.NADH-DH.localisation not clear                 | FTSH11 (FtsH protease 11); ATP-dependent peptidase/ ATPase/ metallopeptidase                                                                                                                                                                                                                   |
| AT5G23980 | ATFRO4    | metal handling.acquisition                                                                      | ftsh4 (FtsH protease 4); ATP-dependent peptidase/ ATPase/ metallopeptidase                                                                                                                                                                                                                     |
| AT5G53170 | FTSH11    | protein.degradation.metalloprotease                                                             | FUT6 (FUCOSYLTRANSFERASE 6); fucosyltransferase/ transferase, transferring glycosyl groups                                                                                                                                                                                                     |
| AT2G26140 | ftsh4     | protein.degradation.metalloprotease                                                             | GAMMA CA1 (GAMMA CARBONIC ANHYDRASE 1); carbonate dehydratase                                                                                                                                                                                                                                  |
| AT1G14080 | ATFUT6    | cell wall.cell wall proteins.AGPs.AGP Fucosyltransferase                                        | GAMMA CA2 (GAMMA CARBONIC ANHYDRASE 2); carbonate dehydratase                                                                                                                                                                                                                                  |
| AT1G19580 | GAMMA CA1 | mitochondrial electron transport / ATP synthesis.NADH-DH.complex I.carbonic anhydrase           |                                                                                                                                                                                                                                                                                                |
| AT1G47260 | APFI      | mitochondrial electron transport / ATP synthesis.NADH-DH.complex I.carbonic anhydrase           |                                                                                                                                                                                                                                                                                                |

|           |            |                                                                                       |                                                                                                                                                                    |
|-----------|------------|---------------------------------------------------------------------------------------|--------------------------------------------------------------------------------------------------------------------------------------------------------------------|
| AT5G66510 | GAMMA CA3  | mitochondrial electron transport / ATP synthesis.NADH-DH.complex I.carbonic anhydrase | GAMMA CA3 (GAMMA CARBONIC ANHYDRASE 3); carbonate dehydratase                                                                                                      |
| AT5G63510 | GAMMA CAL1 | mitochondrial electron transport / ATP synthesis.NADH-DH.complex I.carbonic anhydrase | GAMMA CAL1 (GAMMA CARBONIC ANHYDRASE LIKE 1); carbonate dehydratase                                                                                                |
| AT3G48680 | AtCAL2     | mitochondrial electron transport / ATP synthesis.NADH-DH.complex I.carbonic anhydrase | GAMMA CAL2 (GAMMA CARBONIC ANHYDRASE-LIKE 2); transferase                                                                                                          |
| AT2G36830 | GAMMA-TIP  | transport.Major Intrinsic Proteins.TIP                                                | GAMMA-TIP (GAMMA TONOPLAST INTRINSIC PROTEIN); water channel                                                                                                       |
| AT2G19950 | GC1        | not assigned.unknown                                                                  | GC1 (Golgin Candidate 1)                                                                                                                                           |
| AT2G22475 | GEM        | hormone metabolism.abscisic acid.induced-regulated-responsive-activated               | GEM (GL2-EXPRESSION MODULATOR)                                                                                                                                     |
| AT5G14950 | ATGMII     | protein.glycosylation.mannosyl-oligosaccharide-1,3-1,6-alpha-mannosidase(GMII)        | GMII (GOLGI ALPHA-MANNOSIDASE II); alpha-mannosidase                                                                                                               |
| AT2G26300 | ATGPA1     | signalling.G-proteins                                                                 | GP ALPHA 1 (G PROTEIN ALPHA SUBUNIT 1); GTP binding / GTPase/channel regulator/ signal transducer<br>GPT (UDP-GLCNAC%3ADOLICHOL+PHOSPHATE+GLCNAC-1-P+TRANSFERASE); |
| AT2G41490 | GPT        | protein.glycosylation                                                                 | UDP-N-acetylglucosamine-dolichyl-phosphate N-acetylglucosaminephosphotransferase                                                                                   |
| AT2G26890 | GRV2       | stress.abiotic.heat                                                                   | GRV2 (GRAVITROPISM DEFECTIVE 2); binding / heat shock protein binding                                                                                              |
| AT2G36850 | ATGSL08    | minor CHO metabolism.callose                                                          | GSL8 (GLUCAN SYNTHASE-LIKE 8); 1,3-beta-glucan synthase/transferase, transferring glycosyl groups                                                                  |
| AT4G20410 | GAMMA-SNAP | protein.targeting.secretory pathway.unspecified                                       | GSNAP (GAMMA-SOLUBLE NSF ATTACHMENT PROTEIN); binding / transporter                                                                                                |
| AT4G21150 | HAP6       | development.unspecified                                                               | HAP6 (HAPLESS 6); dolichyl-diphosphooligosaccharide-protein glycotransferase                                                                                       |
| AT5G26040 | HDA2       | RNA.regulation of transcription.HDA                                                   | HDA2; histone deacetylase                                                                                                                                          |
| AT5G14220 | HEMG2      | tetrapyrrole synthesis.protoporphyrin IX oxidase                                      | HEMG2; electron carrier/oxidoreductase/protoporphyrinogen oxidase                                                                                                  |
| AT3G23990 | HSP60      | protein.folding                                                                       | HSP60 (HEAT SHOCK PROTEIN 60); ATP binding                                                                                                                         |

|           |         |                                                                                      |                                                                                                                          |
|-----------|---------|--------------------------------------------------------------------------------------|--------------------------------------------------------------------------------------------------------------------------|
| AT2G33210 | HSP60-2 | protein.folding                                                                      | HSP60-2 (HEAT SHOCK PROTEIN 60-2); ATP binding                                                                           |
| AT5G27670 | HTA7    | DNA.synthesis/chromatin structure.histone.core.H2A                                   | HTA7 (HISTONE H2A 7); DNA binding                                                                                        |
| AT1G70690 | HWI1    | signalling.receptor kinases.misc                                                     | HWI1 (HOPW1-1-INDUCED GENE1)                                                                                             |
| AT4G29130 | ATHXK1  | major CHO metabolism.degradation.sucrose.h exokinase                                 | HXK1 (HEXOKINASE 1); ATP binding / fructokinase/ glucokinase/ hexokinase                                                 |
| AT2G19860 | ATHXK2  | major CHO metabolism.degradation.sucrose.h exokinase                                 | HXK2 (HEXOKINASE 2); ATP binding / fructokinase/ glucokinase/ hexokinase                                                 |
| AT1G20050 | HYD1    | hormone metabolism.brassinosteroid.synthesis-degradation.sterols.HYD1                | HYD1 (HYDRA1); C-8 sterol isomerase                                                                                      |
| AT1G34120 | AT5P1   | minor CHO metabolism.myo-inositol.poly-phosphatases                                  | IP5PI (INOSITOL POLYPHOSPHATE 5-PHOSPHATASE I); inositol trisphosphate phosphatase/ inositol-polyphosphate 5-phosphatase |
| AT4G00630 | ATKEA2  | transport.potassium                                                                  | KEA2; potassium ion transmembrane transporter/ potassium:hydrogen antiporter                                             |
| AT3G05970 | ATLACS6 | lipid metabolism.FA synthesis and FA elongation.long chain fatty acid CoA ligase     | LACS6 (long-chain acyl-CoA synthetase 6); long-chain-fatty-acid-CoA ligase                                               |
| AT5G27600 | ATLACS7 | lipid metabolism.FA synthesis and FA elongation.long chain fatty acid CoA ligase     | LACS7 (LONG-CHAIN ACYL-COA SYNTHETASE 7); long-chain-fatty-acid-CoA ligase/ protein binding                              |
| AT1G77590 | LACS9   | lipid metabolism.FA synthesis and FA elongation.long chain fatty acid CoA ligase     | LACS9 (LONG CHAIN ACYL-COA SYNTHETASE 9); long-chain-fatty-acid-CoA ligase                                               |
| AT2G37860 | LCD1    | development.unspecified                                                              | LCD1 (LOWER CELL DENSITY 1)                                                                                              |
| AT5G40780 | LHT1    | transport.amino acids                                                                | LHT1; amino acid transmembrane transporter                                                                               |
| AT3G57650 | LPAT2   | lipid metabolism.Phospholipid synthesis.1-acylglycerol-3-phosphate O-acyltransferase | LPAT2; 1-acylglycerol-3-phosphate O-acyltransferase                                                                      |
| AT3G16950 | LPD1    | TCA / org transformation.TCA.pyruvate DH.E3                                          | LPD1 (LIPOAMIDE DEHYDROGENASE 1); dihydrolipoyl dehydrogenase                                                            |
| AT5G16590 | LRR1    | signalling.receptor kinases.leucine rich repeat III                                  | LRR1; ATP binding / kinase/ protein serine/threonine kinase                                                              |
| AT3G25860 | LTA2    | lipid metabolism.FA synthesis and FA elongation.pyruvate DH                          | LTA2; dihydrolipoyllysine-residue acetyltransferase                                                                      |
| AT3G52200 | LTA3    | TCA / org transformation.TCA.pyruvate DH.E2                                          | LTA3; ATP binding / dihydrolipoyllysine-residue acetyltransferase                                                        |

|           |           |                                                                                |                                                                                                                                                                                                                                                                                                             |
|-----------|-----------|--------------------------------------------------------------------------------|-------------------------------------------------------------------------------------------------------------------------------------------------------------------------------------------------------------------------------------------------------------------------------------------------------------|
| AT1G03090 | MCCA      | amino acid metabolism.degradation.branched chain group.leucine                 | MCCA; methylcrotonoyl-CoA carboxylase                                                                                                                                                                                                                                                                       |
| AT4G34030 | MCCB      | amino acid metabolism.degradation.branched chain group.leucine                 | MCCB (3-METHYLCROTONYL-COA CARBOXYLASE); biotin carboxylase/ methylcrotonoyl-CoA carboxylase                                                                                                                                                                                                                |
| AT3G27820 | ATMDAR4   | redox.ascorbate and glutathione.ascorbate                                      | MDAR4 (MONODEHYDROASCORBATE REDUCTASE 4); monodehydroascorbate reductase (NADH)                                                                                                                                                                                                                             |
| AT1G04630 | MEE4      | not assigned.unknown                                                           | MEE4 (maternal effect embryo arrest 4)                                                                                                                                                                                                                                                                      |
| AT5G27540 | emb2473   | signalling.G-proteins                                                          | MIRO1 (Miro-related GTP-ase 1); GTP binding                                                                                                                                                                                                                                                                 |
| AT3G63150 | ATCBG     | signalling.G-proteins                                                          | MIRO2 (MIRO-RELATED GTP-ASE 2); GTPase/ calcium ion binding                                                                                                                                                                                                                                                 |
| ATMG00220 | COB       | protein.synthesis.ribosomal protein.prokaryotic.mitochondrion. 30S subunit.S14 | Mitochondrial apocytochrome b (cob) gene encodes a subunit of the ubiquinol-cytochrome c oxidoreductase and is part of a 5 kb transcript. The transcript also contains a pseudogene for ribosomal protein S14 called RPS15 and a tRNA(Ser) gene. Both the Cob and RPS15 genes are edited in the transcript. |
| AT2G42210 | ATOEP16-3 | protein.targeting.mitochondria                                                 | mitochondrial import inner membrane translocase subunit Tim17/Tim22/Tim23 family protein                                                                                                                                                                                                                    |
| AT3G02090 | MPPBETA   | protein.targeting.mitochondria                                                 | mitochondrial processing peptidase beta subunit, putative                                                                                                                                                                                                                                                   |
| AT3G16480 | MPPalpha  | protein.targeting.mitochondria                                                 | MPPalpha (mitochondrial processing peptidase alpha subunit); catalytic/ metal ion binding / metalloendopeptidase/ zinc ion binding                                                                                                                                                                          |
| AT1G30400 | ABCC1     | transport.ABC transporters and multidrug resistance systems                    | MRP1 (ARABIDOPSIS THALIANA MULTIDRUG RESISTANCE-ASSOCIATED PROTEIN 1); ATPase, coupled to transmembrane movement of substances / xenobiotic-transporting ATPase                                                                                                                                             |
| AT5G52240 | AtMAPR5   | redox.ascorbate and glutathione                                                | MSBP1 (membrane steroid binding protein 1); steroid binding                                                                                                                                                                                                                                                 |
| AT5G19520 | ATMSL9    | RNA.regulation of transcription.putative transcription regulator               | MSL9 (MECHANOSENSITIVE CHANNEL OF SMALL CONDUCTANCE-LIKE 9); mechanically-gated ion channel                                                                                                                                                                                                                 |

|           |         |                                                                                                       |                                                                                                                                     |
|-----------|---------|-------------------------------------------------------------------------------------------------------|-------------------------------------------------------------------------------------------------------------------------------------|
| ATMG00270 | NAD6    | mitochondrial electron transport / ATP synthesis.NADH-DH.localisation not clear                       | NADH dehydrogenase subunit 6                                                                                                        |
| ATMG00510 | NAD7    | mitochondrial electron transport / ATP synthesis.NADH-DH.localisation not clear                       | NADH dehydrogenase subunit 7                                                                                                        |
| ATMG00070 | NAD9    | mitochondrial electron transport / ATP synthesis.NADH-DH.localisation not clear                       | NADH dehydrogenase subunit 9                                                                                                        |
| AT4G28220 | NDB1    | mitochondrial electron transport / ATP synthesis.NADH-DH.type II.external                             | NDB1 (NAD(P)H dehydrogenase B1); NADH dehydrogenase/disulfide oxidoreductase                                                        |
| AT5G06320 | NHL3    | stress.biotic                                                                                         | NHL3                                                                                                                                |
| AT5G27150 | AT-NHX1 | transport.unspecified cations                                                                         | NHX1 (NA <sup>+</sup> /H <sup>+</sup> EXCHANGER); protein binding / sodium ion transmembrane transporter/sodium:hydrogen antiporter |
| AT3G44320 | AtNIT3  | misc.nitrilases, *nitrile lyases, berberine bridge enzymes, reticuline oxidases, troponine reductases | NIT3 (NITRILASE 3); indole-3-acetonitrile nitrilase/ indole-3-acetonitrile nitrile hydratase/nitrilase                              |
| AT1G56110 | NOP56   | RNA.regulation of transcription.putative transcription regulator                                      | NOP56 (Arabidopsis homolog of nucleolar protein Nop56)                                                                              |
| AT1G12110 | ATNRT1  | transport.nitrate                                                                                     | NRT1.1; nitrate transmembrane transporter/ transporter                                                                              |
| AT4G04910 | NSF     | protein.degradation.AAA type                                                                          | NSF (N-ethylmaleimide sensitive factor); ATP binding / binding / nucleoside-triphosphatase/ nucleotide binding                      |
| AT1G05500 | ATSYTE  | not assigned.no ontology.C2 domain-containing protein                                                 | NTMC2T2.1                                                                                                                           |
| AT1G80300 | ATNTT1  | transport.misc                                                                                        | NTT1 (NUCLEOTIDE TRANSPORTER 1); ATP:ADP antiporter                                                                                 |
| AT2G43950 | ATOEP37 | not assigned.unknown                                                                                  | OEP37; ion channel                                                                                                                  |
| AT5G19620 | ATOEP80 | protein.targeting.chloroplast                                                                         | OEP80 (OUTER ENVELOPE PROTEIN OF 80 KDA)                                                                                            |
| AT5G62050 | ATOXA1  | transport.peptides and oligopeptides                                                                  | OXA1; P-P-bond-hydrolysis-driven protein transmembrane transporter                                                                  |
| AT5G35590 | PAA1    | protein.degradation.ubiquitin.proteasom                                                               | PAA1 (PROTEASOME ALPHA SUBUNIT A 1); endopeptidase/peptidase/ threonine-type endopeptidase                                          |
| AT2G05840 | PAA2    | protein.degradation.ubiquitin.proteasom                                                               | PAA2 (20S PROTEASOME SUBUNIT PAA2); endopeptidase/peptidase/ threonine-type endopeptidase                                           |

|           |          |                                                             |                                                                                                                       |
|-----------|----------|-------------------------------------------------------------|-----------------------------------------------------------------------------------------------------------------------|
| AT1G16470 | PAB1     | protein.degradation                                         | PAB1 (PROTEASOME SUBUNIT PAB1); endopeptidase/ peptidase/ threonine-type endopeptidase                                |
| AT1G49760 | PAB8     | RNA.processing                                              | PAB8 (POLY(A) BINDING PROTEIN 8); RNA binding / translation initiation factor                                         |
| AT3G22110 | PAC1     | protein.degradation.ubiquitin.proteasom                     | PAC1; endopeptidase/ peptidase/ threonine-type endopeptidase                                                          |
| AT5G42790 | ARS5     | protein.degradation.ubiquitin.proteasom                     | PAF1; endopeptidase/ peptidase/ threonine-type endopeptidase                                                          |
| AT4G37070 | AtPLAIVA | development.storage proteins                                | patatin, putative                                                                                                     |
| AT1G72150 | PATL1    | transport.misc                                              | PATL1 (PATELLIN 1); transporter                                                                                       |
| AT1G22530 | PATL2    | transport.misc                                              | PATL2 (PATELLIN 2); transporter                                                                                       |
| AT4G31300 | PBA1     | protein.degradation.ubiquitin.proteasom                     | PBA1; endopeptidase/ peptidase/ threonine-type endopeptidase                                                          |
| AT3G27430 | PBB1     | protein.degradation.ubiquitin.proteasom                     | PBB1; endopeptidase/ peptidase/ threonine-type endopeptidase                                                          |
| AT1G13060 | PBE1     | protein.degradation.ubiquitin.proteasom                     | PBE1; endopeptidase/ peptidase/ threonine-type endopeptidase                                                          |
| AT3G60820 | PBF1     | protein.degradation.ubiquitin.proteasom                     | PBF1; peptidase/ threonine-type endopeptidase                                                                         |
| AT1G56450 | PBG1     | protein.degradation.ubiquitin.proteasom                     | PBG1; peptidase/ threonine-type endopeptidase                                                                         |
| AT2G26510 | PDE135   | transport.misc                                              | PDE135 (pigment defective embryo 135); transmembrane transporter                                                      |
| AT2G36380 | ABCG34   | transport.ABC transporters and multidrug resistance systems | PDR6; ATPase, coupled to transmembrane movement of substances                                                         |
| AT1G15210 | ABCG35   | transport.ABC transporters and multidrug resistance systems | PDR7 (PLEIOTROPIC DRUG RESISTANCE 7); ATPase, coupled to transmembrane movement of substances                         |
| AT3G53480 | ABCG37   | transport.ABC transporters and multidrug resistance systems | PDR9 (PLEIOTROPIC DRUG RESISTANCE 9); ATPase, coupled to transmembrane movement of substances                         |
| AT2G38670 | PECT1    | cell.division                                               | PECT1 (PHOSPHORYLETHANOLAMINE CYTIDYLYLTRANSFERASE 1); ethanolamine-phosphate cytidylyltransferase                    |
| AT1G59870 | ABCG36   | transport.ABC transporters and multidrug resistance systems | PEN3 (PENETRATION 3); ATPase, coupled to transmembrane movement of substances / cadmium ion transmembrane transporter |
| AT5G09978 | PEP7     | stress.biotic.signalling                                    | PEP7 (ELICITOR PEPTIDE 7 PRECURSOR)                                                                                   |

|           |         |                                                                       |                                                                                                                                                  |
|-----------|---------|-----------------------------------------------------------------------|--------------------------------------------------------------------------------------------------------------------------------------------------|
| AT3G61070 | PEX11E  | cell.organisation                                                     | PEX11E                                                                                                                                           |
| AT5G56630 | PFK7    | glycolysis.unclear/dually targeted.phosphofructokinase (PFK)          | PFK7 (PHOSPHOFRUCTOKINASE 7); 6-phosphofructokinase                                                                                              |
| AT1G02520 | ABCB11  | transport.ABC transporters and multidrug resistance systems           | PGP11 (P-GLYCOPROTEIN 11); ATPase, coupled to transmembrane movement of substances                                                               |
| AT3G55320 | ABCB20  | transport.ABC transporters and multidrug resistance systems           | PGP20 (P-GLYCOPROTEIN 20); ATPase, coupled to transmembrane movement of substances                                                               |
| AT3G62150 | ABCB21  | transport.ABC transporters and multidrug resistance systems           | PGP21 (P-GLYCOPROTEIN 21); ATPase, coupled to transmembrane movement of substances                                                               |
| AT5G18480 | PGSIP6  | major CHO metabolism.synthesis.starch                                 | PGSIP6 (PLANT GLYCOGENIN-LIKE STARCH INITIATION PROTEIN 6); transferase, transferring glycosyl groups / transferase, transferring hexosyl groups |
| AT1G33140 | PGY2    | protein.synthesis.ribosomal protein.eukaryotic.60S subunit.L9         | PGY2 (PIGGYBACK2); structural constituent of ribosome                                                                                            |
| AT3G52190 | AtPHF1  | development.unspecified                                               | PHF1 (PHOSPHATE TRANSPORTER TRAFFIC FACILITATOR1); nucleotide binding                                                                            |
| AT4G23400 | PIP1;5  | transport.Major Intrinsic Proteins.PIP                                | PIP1;5 (PLASMA MEMBRANE INTRINSIC PROTEIN 1;5); water channel                                                                                    |
| AT3G61430 | ATPIP1  | transport.Major Intrinsic Proteins.PIP                                | PIP1A (PLASMA MEMBRANE INTRINSIC PROTEIN 1A); water channel                                                                                      |
| AT2G45960 | ATHH2   | transport.Major Intrinsic Proteins.PIP                                | PIP1B (NAMED PLASMA MEMBRANE INTRINSIC PROTEIN 1B); water channel                                                                                |
| AT5G60660 | PIP2;4  | transport.Major Intrinsic Proteins.PIP                                | PIP2;4 (PLASMA MEMBRANE INTRINSIC PROTEIN 2;4); water channel                                                                                    |
| AT2G37170 | PIP2;2  | transport.Major Intrinsic Proteins.PIP                                | PIP2B (PLASMA MEMBRANE INTRINSIC PROTEIN 2); water channel                                                                                       |
| AT4G35100 | PIP2;7  | transport.Major Intrinsic Proteins.PIP                                | PIP3 (PLASMA MEMBRANE INTRINSIC PROTEIN 3); water channel                                                                                        |
| AT3G05630 | PDLZ2   | lipid metabolism.lipid degradation.lysophospholipases.phospholipase D | PLDP2; phospholipase D                                                                                                                           |
| AT4G04470 | PMP22   | protein.targeting.peroxisomes                                         | PMP22                                                                                                                                            |
| AT3G56110 | PRA1.B1 | cell.vesicle transport                                                | PRA1.B1 (PRENYLATED RAB ACCEPTOR 1.B1)                                                                                                           |
| AT3G13710 | PRA1.F4 | signalling.G-proteins                                                 | PRA1.F4 (PRENYLATED RAB ACCEPTOR 1.F4)                                                                                                           |



|           |               |                                                                          |                                                                                                                                                        |
|-----------|---------------|--------------------------------------------------------------------------|--------------------------------------------------------------------------------------------------------------------------------------------------------|
| AT1G55190 | PRA1.F2       | cell.vesicle transport                                                   | PRA7                                                                                                                                                   |
| AT2G22000 | PROPEP6       | stress.biotic.signalling                                                 | PROPEP6 (Elicitor peptide 6 precursor)                                                                                                                 |
| AT4G25970 | PSD3          | lipid metabolism.Phospholipid synthesis.phosphatidylserine decarboxylase | PSD3 (phosphatidylserine decarboxylase 3); phosphatidylserine decarboxylase                                                                            |
| AT1G65260 | PTAC4         | RNA.regulation of transcription.unclassified                             | PTAC4 (PLASTID TRANSCRIPTIONALLY ACTIVE4)                                                                                                              |
| AT3G54110 | ATPUMP1       | mitochondrial electron transport / ATP synthesis.uncoupling protein      | PUMP1 (PLANT UNCOUPLING MITOCHONDRIAL PROTEIN 1); binding / oxidative phosphorylation uncoupler                                                        |
| AT2G45140 | PVA12         | protein.targeting.secretory pathway.ER                                   | PVA12 (PLANT VAP HOMOLOG 12); structural molecule                                                                                                      |
| AT4G39850 | ABCD1         | transport.ABC transporters and multidrug resistance systems              | PXA1 (PEROXISOMAL ABC TRANSPORTER 1); ATPase, coupled to transmembrane movement of substances                                                          |
| AT5G23300 | PYRD          | nucleotide metabolism.synthesis.pyrimidine.dihydroorotate dehydrogenase  | PYRD (pyrimidine d); dihydroorotate dehydrogenase                                                                                                      |
| AT2G44610 | ATRAB6A       | signalling.G-proteins                                                    | RAB6A; GTP binding / protein binding                                                                                                                   |
| AT4G39990 | ATGB3         | signalling.G-proteins                                                    | RABA4B (RAB GTPASE HOMOLOG A4B); GTP binding                                                                                                           |
| AT4G17170 | AT-RAB2       | signalling.G-proteins                                                    | RABB1C (ARABIDOPSIS RAB GTPASE HOMOLOG B1C); GTP binding / GTPase                                                                                      |
| AT5G44790 | HMA7          | transport.metal                                                          | RAN1 (RESPONSIVE-TO-ANTAGONIST 1); ATPase, coupled to transmembrane movement of ions, phosphorylative mechanism / copper ion transmembrane transporter |
| AT5G47910 | ATRBOHD       | stress.biotic.respiratory burst                                          | RBOHD (RESPIRATORY BURST OXIDASE HOMOLOGUE D); NAD(P)H oxidase                                                                                         |
| AT1G25490 | ATB BETA BETA | protein.postranslational modification                                    | RCN1 (ROOTS CURL IN NPA); protein phosphatase type 2A regulator                                                                                        |
| AT4G39090 | RD19          | protein.degradation.cysteine protease                                    | RD19 (RESPONSIVE TO DEHYDRATION 19); cysteine-type endopeptidase/ cysteine-type peptidase                                                              |
| AT2G37180 | PIP2;3        | transport.Major Intrinsic Proteins.PIP                                   | RD28 (RESPONSIVE TO DESICCATION 28); water channel                                                                                                     |
| AT3G02230 | ATRGP1        | cell wall.cell wall proteins.RGP                                         | RGP1 (REVERSIBLY GLYCOSYLATED POLYPEPTIDE 1); cellulose synthase (UDP-forming)                                                                         |
| AT5G15650 | ATRGP2        | cell wall.cell wall proteins.RGP                                         | RGP2 (REVERSIBLY GLYCOSYLATED POLYPEPTIDE 2);                                                                                                          |

|           |            |                                                                                        |                                                                                                                                                                                                                        |
|-----------|------------|----------------------------------------------------------------------------------------|------------------------------------------------------------------------------------------------------------------------------------------------------------------------------------------------------------------------|
| AT3G13870 | GOM8       | development.unspecified                                                                | transferase, transferring hexosyl groups<br>RHD3 (ROOT HAIR DEFECTIVE 3); GTP binding<br>RHD4 (ROOT HAIR DEFECTIVE4); phosphatidylinositol-4,5-bisphosphate 5-phosphatase/phosphatidylinositol-4-phosphate phosphatase |
| AT3G51460 | RHD4       | lipid metabolism.lipid degradation.lysophospholipases.phosphoinositide phospholipase C | RPL18 (RIBOSOMAL PROTEIN L18); structural constituent of ribosome<br>RPL34 (RIBOSOMAL PROTEIN L34); structural constituent of ribosome                                                                                 |
| AT3G05590 | RPL18      | protein.synthesis.ribosomal protein.eukaryotic.60S subunit.L18                         | RPN10 (REGULATORY PARTICLE NON-ATPASE 10); peptide receptor                                                                                                                                                            |
| AT1G69620 | RPL34      | protein.synthesis.ribosomal protein.eukaryotic.60S subunit.L34                         | RPN12a (Regulatory Particle non-ATPase 12a); peptidase<br>RPN1A (26S PROTEASOME REGULATORY SUBUNIT S2 1A); binding / enzyme regulator                                                                                  |
| AT4G38630 | ATMCB1     | protein.degradation.ubiquitin                                                          | RPN8A (RP NON-ATPASE SUBUNIT 8A)                                                                                                                                                                                       |
| AT1G64520 | RPN12a     | protein.degradation.ubiquitin.proteasom                                                | RPS11-BETA (RIBOSOMAL PROTEIN S11-BETA); structural constituent of ribosome                                                                                                                                            |
| AT2G20580 | ATRPN1A    | protein.degradation.ubiquitin.proteasom                                                | RPS15 (CYTOSOLIC RIBOSOMAL PROTEIN S15); structural constituent of ribosome                                                                                                                                            |
| AT5G05780 | AE3        | protein.degradation.ubiquitin.proteasom                                                | RPS15AD (ribosomal protein S15A D); structural constituent of ribosome                                                                                                                                                 |
| AT5G23740 | RPS11-BETA | protein.synthesis.ribosomal protein.eukaryotic.40S subunit.S11                         | RPS18C (S18 RIBOSOMAL PROTEIN); RNA binding / nucleic acid binding / structural constituent of ribosome                                                                                                                |
| AT1G04270 | RPS15      | protein.synthesis.ribosomal protein.eukaryotic.40S subunit.S15                         | RPT1A (REGULATORY PARTICLE TRIPLE-A 1A); ATPase                                                                                                                                                                        |
| AT3G46040 | RPS15AD    | protein.synthesis.ribosomal protein.eukaryotic.40S subunit.S15A                        | RPT3 (REGULATORY PARTICLE TRIPLE-A ATPASE 3); ATPase                                                                                                                                                                   |
| AT4G09800 | RPS18C     | protein.synthesis.ribosomal protein.eukaryotic.40S subunit.S18                         | RPT4A; ATPase                                                                                                                                                                                                          |
| AT1G53750 | RPT1A      | protein.degradation.ubiquitin.proteasom                                                | RPT5A (REGULATORY PARTICLE TRIPLE-A ATPASE 5A); ATPase/calmodulin binding                                                                                                                                              |
| AT5G58290 | RPT3       | protein.degradation.ubiquitin.proteasom                                                | RPT6A (REGULATORY PARTICLE TRIPLE-A ATPASE 6A); ATPase                                                                                                                                                                 |
| AT5G43010 | RPT4A      | protein.degradation.ubiquitin.proteasom                                                | SAR1 (SYNAPTOBREVIN-RELATED PROTEIN 1)                                                                                                                                                                                 |
| AT3G05530 | ATS6A.2    | protein.degradation.ubiquitin.proteasom                                                |                                                                                                                                                                                                                        |
| AT5G19990 | ATSUG1     | protein.degradation.ubiquitin.proteasom                                                |                                                                                                                                                                                                                        |
| AT2G33120 | ATVAMP722  | cell.vesicle transport                                                                 |                                                                                                                                                                                                                        |

|           |            |                                                                                       |                                                                                                                    |
|-----------|------------|---------------------------------------------------------------------------------------|--------------------------------------------------------------------------------------------------------------------|
| AT1G20780 | ATPUB44    | stress.biotic                                                                         | SAUL1 (SENESCENCE-ASSOCIATED E3 UBIQUITIN LIGASE 1); ubiquitin-protein ligase                                      |
| AT1G61250 | SC3        | transport.misc                                                                        | SC3 (SECRETORY CARRIER 3); transmembrane transporter                                                               |
| AT3G10410 | CPY        | protein.degradation.serine protease                                                   | scpl49 (serine carboxypeptidase-like 49); serine-type carboxypeptidase                                             |
| AT3G10370 | SDP6       | lipid metabolism.glyceral metabolism.FAD-dependent glycerol-3-phosphate dehydrogenase | SDP6 (SUGAR-DEPENDENT 6); glycerol-3-phosphate dehydrogenase                                                       |
| AT5G12370 | SEC10      | cell.vesicle transport                                                                | SEC10 (EXOCYST COMPLEX COMPONENT SEC10)                                                                            |
| AT1G11890 | ATSEC22    | protein.targeting.secretory pathway.unspecified                                       | SEC22; transporter                                                                                                 |
| AT1G71820 | SEC6       | not assigned.unknown                                                                  | SEC6                                                                                                               |
| AT2G45070 | SEC61 BETA | protein.targeting.secretory pathway.unspecified                                       | SEC61 BETA; protein transporter                                                                                    |
| AT3G10380 | ATSEC8     | cell.vesicle transport                                                                | SEC8 (SUBUNIT OF EXOCYST COMPLEX 8)                                                                                |
| AT4G32400 | ATBT1      | transport.metabolite transporters at the envelope membrane                            | SHS1 (SODIUM HYPERSENSITIVE 1); binding / nucleotide transmembrane transporter/ transporter                        |
| AT5G13710 | CPH        | hormone metabolism.brassinosteroid.synthesis-degradation.sterols.SMT2                 | SMT1 (STEROL METHYLTRANSFERASE 1); sterol 24-C-methyltransferase                                                   |
| AT1G20330 | CVP1       | hormone metabolism.brassinosteroid.synthesis-degradation.sterols.SMT2                 | SMT2 (STEROL METHYLTRANSFERASE 2); S-adenosylmethionine-dependent methyltransferase                                |
| AT1G76090 | SMT3       | hormone metabolism.brassinosteroid.synthesis-degradation.sterols.SMT2                 | SMT3 (STEROL METHYLTRANSFERASE 3); S-adenosylmethionine-dependent methyltransferase/ sterol 24-C-methyltransferase |
| AT5G06140 | ATSNX1     | protein.targeting.secretory pathway.vacuole                                           | SNX1 (SORTING NEXIN 1); phosphoinositide binding / protein binding                                                 |
| AT5G58440 | SNX2a      | cell.vesicle transport                                                                | SNX2a (SORTING NEXIN 2a); phosphoinositide binding                                                                 |
| AT2G37970 | SOUL-1     | not assigned.no ontology                                                              | SOUL-1; binding                                                                                                    |
| AT4G21540 | SPHK1      | lipid metabolism.'exotics' (steroids, squalene etc).sphingolipids                     | SPHK1 (SPHINGOSINE KINASE 1); D-erythro-sphingosine kinase/ diacylglycerol kinase/ sphinganine kinase              |
| AT5G01220 | SQD2       | lipid metabolism.glycolipid synthesis.sulfolipid synthase                             | SQD2 (sulfoquinovosyldiacylglycerol 2); UDP-glycosyltransferase/ UDP-                                              |

|           |          |  |         |                                                                |                                                                       |                                                                                     |                                           |                                                             |                     |                  |                  |                             |                             |                                                                       |                         |                        |                        |                        |                        |
|-----------|----------|--|---------|----------------------------------------------------------------|-----------------------------------------------------------------------|-------------------------------------------------------------------------------------|-------------------------------------------|-------------------------------------------------------------|---------------------|------------------|------------------|-----------------------------|-----------------------------|-----------------------------------------------------------------------|-------------------------|------------------------|------------------------|------------------------|------------------------|
|           |          |  | hormone | metabolism.brassinosteroid.synthesis-degradation.sterols.other | lipid metabolism.'exotics' (steroids, squalene etc).squalene synthase | protein.postranslational modification.kinase.receptor like cytoplasmatic kinase VII | secondary metabolism.N misc.alkaloid-like | transport.ABC transporters and multidrug resistance systems | protein.degradation | transport.sugars | transport.sugars | stress.abiotic.drought/salt | stress.abiotic.drought/salt | mitochondrial electron transport / ATP synthesis.cytochrome c oxidase | RNA.processing.splicing | cell.vesicle transport | cell.vesicle transport | cell.vesicle transport | cell.vesicle transport |
| AT5G24140 | SQP2     |  |         |                                                                |                                                                       |                                                                                     |                                           |                                                             |                     |                  |                  |                             |                             |                                                                       |                         |                        |                        |                        |                        |
| AT4G34640 | ERG9     |  |         |                                                                |                                                                       |                                                                                     |                                           |                                                             |                     |                  |                  |                             |                             |                                                                       |                         |                        |                        |                        |                        |
| AT4G22130 | SRF8     |  |         |                                                                |                                                                       |                                                                                     |                                           |                                                             |                     |                  |                  |                             |                             |                                                                       |                         |                        |                        |                        |                        |
| AT1G74020 | SS2      |  |         |                                                                |                                                                       |                                                                                     |                                           |                                                             |                     |                  |                  |                             |                             |                                                                       |                         |                        |                        |                        |                        |
| AT5G58270 | ABCB25   |  |         |                                                                |                                                                       |                                                                                     |                                           |                                                             |                     |                  |                  |                             |                             |                                                                       |                         |                        |                        |                        |                        |
| AT2G01470 | ATSEC12  |  |         |                                                                |                                                                       |                                                                                     |                                           |                                                             |                     |                  |                  |                             |                             |                                                                       |                         |                        |                        |                        |                        |
| AT1G11260 | ATSTP1   |  |         |                                                                |                                                                       |                                                                                     |                                           |                                                             |                     |                  |                  |                             |                             |                                                                       |                         |                        |                        |                        |                        |
| AT3G19930 | ATSTP4   |  |         |                                                                |                                                                       |                                                                                     |                                           |                                                             |                     |                  |                  |                             |                             |                                                                       |                         |                        |                        |                        |                        |
| AT5G19690 | STT3A    |  |         |                                                                |                                                                       |                                                                                     |                                           |                                                             |                     |                  |                  |                             |                             |                                                                       |                         |                        |                        |                        |                        |
| AT1G34130 | STT3B    |  |         |                                                                |                                                                       |                                                                                     |                                           |                                                             |                     |                  |                  |                             |                             |                                                                       |                         |                        |                        |                        |                        |
| AT3G17910 | EMB3121  |  |         |                                                                |                                                                       |                                                                                     |                                           |                                                             |                     |                  |                  |                             |                             |                                                                       |                         |                        |                        |                        |                        |
| AT1G80070 | EMB14    |  |         |                                                                |                                                                       |                                                                                     |                                           |                                                             |                     |                  |                  |                             |                             |                                                                       |                         |                        |                        |                        |                        |
| AT3G11820 | AT-SYR1  |  |         |                                                                |                                                                       |                                                                                     |                                           |                                                             |                     |                  |                  |                             |                             |                                                                       |                         |                        |                        |                        |                        |
| AT3G52400 | ATSYP122 |  |         |                                                                |                                                                       |                                                                                     |                                           |                                                             |                     |                  |                  |                             |                             |                                                                       |                         |                        |                        |                        |                        |
| AT5G08080 | ATSYP132 |  |         |                                                                |                                                                       |                                                                                     |                                           |                                                             |                     |                  |                  |                             |                             |                                                                       |                         |                        |                        |                        |                        |
| AT3G05710 | ATSYP43  |  |         |                                                                |                                                                       |                                                                                     |                                           |                                                             |                     |                  |                  |                             |                             |                                                                       |                         |                        |                        |                        |                        |

|           |            |                                                                   |                                                                                                                                                      |
|-----------|------------|-------------------------------------------------------------------|------------------------------------------------------------------------------------------------------------------------------------------------------|
| AT3G09740 | ATSYP71    | cell.vesicle transport                                            | SYP71 (SYNTAXIN OF PLANTS 71); protein transporter                                                                                                   |
| AT2G20990 | ATSYTA     | not assigned.no ontology.C2 domain-containing protein             | SYTA (SYNAPTOTAGMIN A)                                                                                                                               |
| AT3G45600 | TET3       | development.unspecified                                           | TET3 (TETRASPANIN3)                                                                                                                                  |
| AT2G23810 | TET8       | development.unspecified                                           | TET8 (TETRASPANIN8)                                                                                                                                  |
| AT5G48010 | AtTHAS1    | secondary metabolism.isoprenoids.terpenoids                       | THAS1 (THALIANOL SYNTHASE 1); catalytic/ thalianol synthase                                                                                          |
| AT4G27080 | ATPDI7     | redox.thioredoxin.PDIL                                            | thioredoxin family protein                                                                                                                           |
| AT1G06950 | ATTIC110   | protein.targeting.chloroplast                                     | TIC110 (TRANSLOCON AT THE INNER ENVELOPE MEMBRANE OF CHLOROPLASTS 110)                                                                               |
| AT1G10840 | TIF3H1     | protein.synthesis.initiation                                      | TIF3H1; translation initiation factor                                                                                                                |
| AT5G58070 | ATTIL      | transport.misc                                                    | TIL (TEMPERATURE-INDUCED LIPOCALIN); binding / transporter                                                                                           |
| AT1G55900 | EMB1860    | transport.metabolite transporters at the mitochondrial membrane   | TIM50                                                                                                                                                |
| AT5G20350 | TIP1       | cell.organisation                                                 | TIP1 (TIP GROWTH DEFECTIVE 1); S-acyltransferase/ acyl binding                                                                                       |
| AT3G26520 | GAMMA-TIP2 | transport.Major Intrinsic Proteins.TIP                            | TIP2 (TONOPLAST INTRINSIC PROTEIN 2); water channel                                                                                                  |
| AT1G45201 | ATTLL1     | lipid metabolism.lipid degradation.lipases.triacylglycerol lipase | TLL1 (TRIACYLGLYCEROL LIPASE-LIKE 1); triacylglycerol lipase                                                                                         |
| AT1G20840 | AtTMT1     | transport.sugars                                                  | TMT1 (TONOPLAST MONOSACCHARIDE TRANSPORTER1); carbohydrate transmembrane transporter/ nucleoside transmembrane transporter/ sugar:hydrogen symporter |
| AT4G35300 | TMT2       | transport.sugars                                                  | TMT2 (TONOPLAST MONOSACCHARIDE TRANSPORTER2); carbohydrate transmembrane transporter/ nucleoside transmembrane transporter/ sugar:hydrogen symporter |
| AT5G05000 | ATTOC34    | protein.targeting.chloroplast                                     | TOC34 (TRANSLOCON AT THE OUTER ENVELOPE MEMBRANE OF CHLOROPLASTS 34); GTP binding                                                                    |
| AT3G46740 | MAR1       | protein.targeting.chloroplast                                     | TOC75-III (TRANSLOCON AT THE OUTER ENVELOPE MEMBRANE OF CHLOROPLASTS 75-III); P-P-bond-hydrolysis-driven protein transmembrane transporter           |

|           |           |                                                                        |                                                                                                                            |
|-----------|-----------|------------------------------------------------------------------------|----------------------------------------------------------------------------------------------------------------------------|
| AT1G27390 | TOM20-2   | protein.targeting.mitochondria                                         | TOM20-2 (TRANSLOCASE OUTER MEMBRANE 20-2); P-P-bond-hydrolysis-driven protein transmembrane transporter/ metal ion binding |
| AT3G27080 | TOM20-3   | protein.targeting.mitochondria                                         | TOM20-3 (TRANSLOCASE OF OUTER MEMBRANE 20 KDA SUBUNIT 3); P-P-bond-hydrolysis-driven protein transmembrane transporter     |
| AT5G40930 | TOM20-4   | protein.targeting.mitochondria                                         | TOM20-4 (TRANSLOCASE OF OUTER MEMBRANE 20-4); P-P-bond-hydrolysis-driven protein transmembrane transporter                 |
| AT5G43970 | ATTOM22-V | protein.targeting.mitochondria                                         | TOM22-V (TRANSLOCASE OF OUTER MEMBRANE 22-V); P-P-bond-hydrolysis-driven protein transmembrane transporter                 |
| AT1G32400 | TOM2A     | development.unspecified                                                | TOM2A (TOBAMOVIRUS MULTIPLICATION 2A); protein binding                                                                     |
| AT3G20000 | TOM40     | protein.targeting.mitochondria                                         | TOM40; P-P-bond-hydrolysis-driven protein transmembrane transporter/ voltage-gated anion channel                           |
| AT5G08040 | TOM5      | protein.targeting.unknown                                              | TOM5 (MITOCHONDRIAL IMPORT RECEPTOR SUBUNIT TOM5 HOMOLOG)                                                                  |
| AT4G20850 | TPP2      | protein.degradation.serine protease                                    | TPP2 (TRIPLEPTIDYL PEPTIDASE II); tripeptidyl-peptidase                                                                    |
| AT4G23640 | ATKT3     | transport.potassium                                                    | TRH1 (TINY ROOT HAIR 1); potassium ion transmembrane transporter                                                           |
| AT5G19780 | TUA5      | cell.organisation                                                      | TUA5; structural constituent of cytoskeleton                                                                               |
| AT5G44340 | TUB4      | cell.organisation                                                      | TUB4; structural constituent of cytoskeleton                                                                               |
| AT1G20010 | TUB5      | cell.organisation                                                      | TUB5; structural constituent of cytoskeleton                                                                               |
| AT4G11150 | emb2448   | transport.p- and v-ATPases.H+-transporting two-sector ATPase.subunit E | TUF (VACUOLAR ATP SYNTHASE SUBUNIT E1); proton-transporting ATPase, rotational mechanism                                   |
| AT3G53520 | ATUXS1    | cell wall.precursor synthesis.UXS                                      | UXS1 (UDP-GLUCURONIC ACID DECARBOXYLASE 1); UDP-glucuronate decarboxylase/ catalytic                                       |
| AT3G60600 | (AT)VAP   | DNA.unspecified                                                        | VAP (VESICLE ASSOCIATED PROTEIN); protein binding                                                                          |
| AT5G42270 | FTSH5     | protein.degradation.metalloprotease                                    | VAR1 (VARIEGATED 1); ATP-dependent peptidase/ ATPase/ metalloprotease                                                      |

|           |          |                                                              |                                                                                                                                                                                                                                                                |
|-----------|----------|--------------------------------------------------------------|----------------------------------------------------------------------------------------------------------------------------------------------------------------------------------------------------------------------------------------------------------------|
| AT2G30950 | FTSH2    | protein.degradation.metalloprotease                          | VAR2 (VARIEGATED 2); ATP-dependent peptidase/ ATPase/ metalloprotease/ zinc ion binding                                                                                                                                                                        |
| AT3G01280 | ATVDAC1  | transport.porins                                             | VDAC1 (VOLTAGE DEPENDENT ANION CHANNEL 1); voltage-gated anion channel                                                                                                                                                                                         |
| AT5G67500 | ATVDAC2  | transport.porins                                             | VDAC2 (VOLTAGE DEPENDENT ANION CHANNEL 2); voltage-gated anion channel                                                                                                                                                                                         |
| AT5G15090 | ATVDAC3  | transport.porins                                             | VDAC3 (VOLTAGE DEPENDENT ANION CHANNEL 3); voltage-gated anion channel                                                                                                                                                                                         |
| AT5G57490 | ATVDAC4  | transport.unspecified anions                                 | VDAC4 (VOLTAGE DEPENDENT ANION CHANNEL 4); voltage-gated anion channel                                                                                                                                                                                         |
| AT1G78900 | VHA-A    | transport.p- and v-ATPases                                   | VHA-A (VACUOLAR ATP SYNTHASE SUBUNIT A); ATP binding / hydrogen ion transporting ATP synthase, rotational mechanism / hydrolase, acting on acid anhydrides, catalyzing transmembrane movement of substances / proton-transporting ATPase, rotational mechanism |
| AT2G28520 | VHA-A1   | transport.p- and v-ATPases                                   | VHA-A1 (VACUOLAR PROTON ATPASE A 1); ATPase                                                                                                                                                                                                                    |
| AT2G21410 | VHA-A2   | transport.p- and v-ATPases                                   | VHA-A2 (VACUOLAR PROTON ATPASE A2); ATPase                                                                                                                                                                                                                     |
| AT4G39080 | VHA-A3   | transport.p- and v-ATPases                                   | VHA-A3 (VACUOLAR PROTON ATPASE A3); ATPase                                                                                                                                                                                                                     |
| AT1G64200 | VHA-E3   | transport.p- and v-ATPases.H+-transporting two-sector ATPase | VHA-E3 (VACUOLAR H <sup>+</sup> -ATPASE SUBUNIT E ISOFORM 3); proton-transporting ATPase, rotational mechanism                                                                                                                                                 |
| AT3G01390 | AVMA10   | transport.p- and v-ATPases                                   | VMA10 (VACUOLAR MEMBRANE ATPASE 10); hydrogen ion transporting ATP synthase, rotational mechanism                                                                                                                                                              |
| AT5G63880 | VPS20.1  | RNA.regulation of transcription.SNF7                         | VPS20.1                                                                                                                                                                                                                                                        |
| AT5G09260 | VPS20.2  | cell.vesicle transport                                       | VPS20.2 (VACUOLAR PROTEIN SORTING-ASSOCIATED PROTEIN 20.2)                                                                                                                                                                                                     |
| AT1G77140 | ATVPS45  | protein.targeting.secretory pathway.vacuole                  | VPS45 (VACUOLAR PROTEIN SORTING 45); protein transporter                                                                                                                                                                                                       |
| AT3G52850 | ATELP    | protein.targeting.secretory pathway.vacuole                  | VSR1 (VACUOLAR SORTING RECEPTOR HOMOLOG 1); amino-terminal vacuolar sorting propeptide binding                                                                                                                                                                 |
| AT2G14720 | BP80-2;1 | protein.targeting.secretory pathway.vacuole                  | VSR-2; calcium ion binding                                                                                                                                                                                                                                     |

|           |        |                                                                  |                                                                                                                           |
|-----------|--------|------------------------------------------------------------------|---------------------------------------------------------------------------------------------------------------------------|
| AT1G09850 | XBCP3  | protein.degradation.cysteine protease                            | XBCP3 (xylem bark cysteine peptidase 3); cysteine-type endopeptidase/ cysteine-type peptidase                             |
| AT5G20490 | ATXIK  | cell.organisation                                                | XIK; motor/ protein binding                                                                                               |
| AT5G55500 | ATXYLT | protein.glycosylation.beta-1,2-xylosyltransferase(beta-1,2-XylT) | XYLT (ARABIDOPSIS THALIANA BETA-1,2-XYLOSYLTRANSFERASE); xylosyltransferase                                               |
| AT1G67730 | ATKCR1 | secondary metabolism.wax                                         | YBR159; ketoreductase/ oxidoreductase                                                                                     |
| AT3G51430 | SSL5   | secondary metabolism.N misc.alkaloid-like                        | YLS2; strictosidine synthase                                                                                              |
| AT3G47630 |        | not assigned.unknown                                             | FUNCTIONS IN: molecular_function unknown; INVOLVED IN: biological_process unknown;                                        |
| AT4G17140 |        | not assigned.no ontology.C2 domain-containing protein            | FUNCTIONS IN: molecular_function unknown; INVOLVED IN: biological_process unknown;                                        |
| AT3G55600 |        | not assigned.unknown                                             | FUNCTIONS IN: molecular_function unknown; INVOLVED IN: biological_process unknown;                                        |
| AT5G62270 |        | not assigned.unknown                                             | FUNCTIONS IN: molecular_function unknown; INVOLVED IN: biological_process unknown; LOCATED IN: cellular_component unknown |
| AT3G48380 |        | not assigned.unknown                                             | FUNCTIONS IN: molecular_function unknown; INVOLVED IN: biological_process unknown; LOCATED IN: cellular_component unknown |
| AT5G40510 |        | not assigned.unknown                                             | FUNCTIONS IN: molecular_function unknown; INVOLVED IN: biological_process unknown; LOCATED IN: cellular_component unknown |
| AT4G12340 |        | not assigned.unknown                                             | FUNCTIONS IN: molecular_function unknown; INVOLVED IN: biological_process unknown; LOCATED IN: cellular_component unknown |
| AT5G10780 |        | not assigned.no ontology                                         | FUNCTIONS IN: molecular_function unknown; INVOLVED IN: biological_process unknown; LOCATED IN: cellular_component unknown |
| AT4G26410 |        | not assigned.unknown                                             | FUNCTIONS IN: molecular_function unknown; INVOLVED IN: biological_process unknown; LOCATED IN: cellular_component unknown |



|           |        |                         |                                                                                                                                                                           |
|-----------|--------|-------------------------|---------------------------------------------------------------------------------------------------------------------------------------------------------------------------|
| AT4G00026 | SD3    | not assigned.unknown    | FUNCTIONS IN: molecular_function unknown; INVOLVED IN: biological_process unknown; LOCATED IN: chloroplast                                                                |
| AT2G41475 |        | development.unspecified | FUNCTIONS IN: molecular_function unknown; INVOLVED IN: biological_process unknown; LOCATED IN: endomembrane system                                                        |
| AT3G27570 |        | not assigned.unknown    | FUNCTIONS IN: molecular_function unknown; INVOLVED IN: biological_process unknown; LOCATED IN: endomembrane system                                                        |
| AT5G47420 |        | not assigned.unknown    | FUNCTIONS IN: molecular_function unknown; INVOLVED IN: biological_process unknown; LOCATED IN: endoplasmic reticulum                                                      |
| AT2G35610 | XEG113 | not assigned.unknown    | FUNCTIONS IN: molecular_function unknown; INVOLVED IN: biological_process unknown; LOCATED IN: Golgi apparatus                                                            |
| AT1G33230 |        | not assigned.unknown    | FUNCTIONS IN: molecular_function unknown; INVOLVED IN: biological_process unknown; LOCATED IN: integral to membrane                                                       |
| AT2G44640 |        | not assigned.unknown    | FUNCTIONS IN: molecular_function unknown; INVOLVED IN: biological_process unknown; LOCATED IN: mitochondrion, chloroplast, plasma membrane, plastid, chloroplast envelope |
| AT2G40800 |        | not assigned.unknown    | FUNCTIONS IN: molecular_function unknown; INVOLVED IN: biological_process unknown; LOCATED IN: mitochondrion                                                              |
| AT2G45060 |        | not assigned.unknown    | FUNCTIONS IN: molecular_function unknown; INVOLVED IN: biological_process unknown; LOCATED IN: mitochondrion                                                              |
| AT4G24290 |        | not assigned.unknown    | FUNCTIONS IN: molecular_function unknown; INVOLVED IN: biological_process unknown; LOCATED IN: plasma membrane                                                            |
| AT1G17620 |        | not assigned.unknown    | FUNCTIONS IN: molecular_function unknown; INVOLVED IN: biological_process unknown; LOCATED IN: plasma membrane                                                            |
| AT5G64090 |        | not assigned.unknown    | FUNCTIONS IN: molecular_function unknown; INVOLVED IN:                                                                                                                    |

|           |        |                             |                                                                                                                                                                                                                                                                                                                                                                                                                                                                                                                                                                                                                                                                                                                                                                                                                                                                                                                                                                                                                                                                                                                                                                                                                                                                                                                                                                                                                                                                                                                                                                                             |
|-----------|--------|-----------------------------|---------------------------------------------------------------------------------------------------------------------------------------------------------------------------------------------------------------------------------------------------------------------------------------------------------------------------------------------------------------------------------------------------------------------------------------------------------------------------------------------------------------------------------------------------------------------------------------------------------------------------------------------------------------------------------------------------------------------------------------------------------------------------------------------------------------------------------------------------------------------------------------------------------------------------------------------------------------------------------------------------------------------------------------------------------------------------------------------------------------------------------------------------------------------------------------------------------------------------------------------------------------------------------------------------------------------------------------------------------------------------------------------------------------------------------------------------------------------------------------------------------------------------------------------------------------------------------------------|
| AT5G24710 | AtPCR2 | not assigned.no ontology    | biological_process unknown;<br>LOCATED IN: plasma membrane<br>FUNCTIONS IN: molecular_function unknown;<br>INVOLVED IN: biological_process unknown;<br>LOCATED IN: plasma membrane<br>FUNCTIONS IN: molecular_function unknown;<br>INVOLVED IN: biological_process unknown;<br>LOCATED IN: plasma membrane<br>FUNCTIONS IN: molecular_function unknown;<br>INVOLVED IN: defense response;<br>LOCATED IN: membrane<br>FUNCTIONS IN: molecular_function unknown;<br>INVOLVED IN: intracellular protein transport;<br>LOCATED IN: endoplasmic reticulum, plasma membrane<br>FUNCTIONS IN: molecular_function unknown;<br>INVOLVED IN: response to cadmium ion;<br>LOCATED IN: plasma membrane<br>FUNCTIONS IN: molecular_function unknown;<br>INVOLVED IN: response to oxidative stress;<br>LOCATED IN: plasma membrane<br>FUNCTIONS IN: molecular_function unknown;<br>; LOCATED IN: endomembrane system, integral to membrane<br>FUNCTIONS IN: molecular_function unknown;<br>; LOCATED IN: plasma membrane, vacuole, membrane<br>; INVOLVED IN: biological_process unknown;<br>LOCATED IN: chloroplast, chloroplast inner membrane, chloroplast envelope<br>; INVOLVED IN: biological_process unknown;<br>LOCATED IN: mitochondrion, chloroplast, plastid, chloroplast inner membrane, chloroplast envelope<br>; INVOLVED IN: protein processing;<br>LOCATED IN: mitochondrion, endoplasmic reticulum, plasma membrane, vacuole<br>; ; LOCATED IN: cellular_component unknown<br>; ; LOCATED IN: endomembrane system, integral to membrane<br>; ; LOCATED IN: endomembrane system, membrane |
| AT2G31140 |        | not assigned.unknown        |                                                                                                                                                                                                                                                                                                                                                                                                                                                                                                                                                                                                                                                                                                                                                                                                                                                                                                                                                                                                                                                                                                                                                                                                                                                                                                                                                                                                                                                                                                                                                                                             |
| AT3G23180 |        | not assigned.no ontology    |                                                                                                                                                                                                                                                                                                                                                                                                                                                                                                                                                                                                                                                                                                                                                                                                                                                                                                                                                                                                                                                                                                                                                                                                                                                                                                                                                                                                                                                                                                                                                                                             |
| AT5G42570 |        | not assigned.no ontology    |                                                                                                                                                                                                                                                                                                                                                                                                                                                                                                                                                                                                                                                                                                                                                                                                                                                                                                                                                                                                                                                                                                                                                                                                                                                                                                                                                                                                                                                                                                                                                                                             |
| AT2G32240 |        | not assigned.unknown        |                                                                                                                                                                                                                                                                                                                                                                                                                                                                                                                                                                                                                                                                                                                                                                                                                                                                                                                                                                                                                                                                                                                                                                                                                                                                                                                                                                                                                                                                                                                                                                                             |
| AT1G14870 |        | not assigned.no ontology    |                                                                                                                                                                                                                                                                                                                                                                                                                                                                                                                                                                                                                                                                                                                                                                                                                                                                                                                                                                                                                                                                                                                                                                                                                                                                                                                                                                                                                                                                                                                                                                                             |
| AT1G61670 |        | not assigned.no ontology    |                                                                                                                                                                                                                                                                                                                                                                                                                                                                                                                                                                                                                                                                                                                                                                                                                                                                                                                                                                                                                                                                                                                                                                                                                                                                                                                                                                                                                                                                                                                                                                                             |
| AT4G28770 |        | not assigned.unknown        |                                                                                                                                                                                                                                                                                                                                                                                                                                                                                                                                                                                                                                                                                                                                                                                                                                                                                                                                                                                                                                                                                                                                                                                                                                                                                                                                                                                                                                                                                                                                                                                             |
| AT3G51140 |        | not assigned.unknown        |                                                                                                                                                                                                                                                                                                                                                                                                                                                                                                                                                                                                                                                                                                                                                                                                                                                                                                                                                                                                                                                                                                                                                                                                                                                                                                                                                                                                                                                                                                                                                                                             |
| AT5G24690 |        | not assigned.unknown        |                                                                                                                                                                                                                                                                                                                                                                                                                                                                                                                                                                                                                                                                                                                                                                                                                                                                                                                                                                                                                                                                                                                                                                                                                                                                                                                                                                                                                                                                                                                                                                                             |
| AT3G44330 |        | not assigned.unknown        |                                                                                                                                                                                                                                                                                                                                                                                                                                                                                                                                                                                                                                                                                                                                                                                                                                                                                                                                                                                                                                                                                                                                                                                                                                                                                                                                                                                                                                                                                                                                                                                             |
| AT5G66420 |        | not assigned.unknown        |                                                                                                                                                                                                                                                                                                                                                                                                                                                                                                                                                                                                                                                                                                                                                                                                                                                                                                                                                                                                                                                                                                                                                                                                                                                                                                                                                                                                                                                                                                                                                                                             |
| AT5G42090 |        | not assigned.unknown        |                                                                                                                                                                                                                                                                                                                                                                                                                                                                                                                                                                                                                                                                                                                                                                                                                                                                                                                                                                                                                                                                                                                                                                                                                                                                                                                                                                                                                                                                                                                                                                                             |
| AT1G69450 |        | stress.abiotic.drought/salt |                                                                                                                                                                                                                                                                                                                                                                                                                                                                                                                                                                                                                                                                                                                                                                                                                                                                                                                                                                                                                                                                                                                                                                                                                                                                                                                                                                                                                                                                                                                                                                                             |

|           |       |                                                                                                             |                                                                                                                                                   |
|-----------|-------|-------------------------------------------------------------------------------------------------------------|---------------------------------------------------------------------------------------------------------------------------------------------------|
| AT4G29520 | RRA3  | not assigned.unknown                                                                                        | ; ; LOCATED IN: endoplasmic reticulum, plasma membrane                                                                                            |
| AT1G19360 |       | not assigned.unknown                                                                                        | ; ; LOCATED IN: endoplasmic reticulum                                                                                                             |
| AT4G12650 |       | not assigned.unknown                                                                                        | ; ; LOCATED IN: integral to membrane, Golgi apparatus, plasma membrane, vacuole                                                                   |
| AT5G35160 |       | not assigned.unknown                                                                                        | ; ; LOCATED IN: integral to membrane, Golgi apparatus                                                                                             |
| AT5G23890 |       | not assigned.no ontology                                                                                    | ; ; LOCATED IN: mitochondrion, chloroplast thylakoid membrane, chloroplast, plastid, chloroplast envelope                                         |
| AT3G58840 | PMD1  | not assigned.unknown                                                                                        | ; ; LOCATED IN: mitochondrion, plastid                                                                                                            |
| AT2G20230 |       | not assigned.unknown                                                                                        | ; ; LOCATED IN: plasma membrane, vacuole                                                                                                          |
| AT3G19340 |       | not assigned.unknown                                                                                        | ; ; LOCATED IN: plasma membrane                                                                                                                   |
| AT5G20660 |       | protein.degradation                                                                                         | 24 kDa vacuolar protein, putative                                                                                                                 |
| AT2G20140 | RPT2b | protein.degradation.ubiquitin.proteasom                                                                     | 26S protease regulatory complex subunit 4, putative                                                                                               |
| AT5G23540 |       | protein.degradation.ubiquitin.proteasom                                                                     | 26S proteasome regulatory subunit, putative                                                                                                       |
| AT1G22410 |       | amino acid metabolism.synthesis.aromatic aa.chorismate.3-deoxy-D-arabino-heptulosonate 7-phosphate synthase | 2-dehydro-3-deoxyphosphoheptonate aldolase, putative / 3-deoxy-D-arabino-heptulosonate 7-phosphate synthase, putative / DAHP synthetase, putative |
| AT4G26910 |       | not assigned.no ontology                                                                                    | 2-oxoacid dehydrogenase family protein                                                                                                            |
| AT5G55070 |       | TCA / org transformation.TCA.2-oxoglutarate dehydrogenase                                                   | 2-oxoacid dehydrogenase family protein                                                                                                            |
| AT2G33630 |       | lipid metabolism.'exotics' (steroids, squalene etc).3-beta hydroxysteroid dehydrogenase/isomerase           | 3-beta hydroxysteroid dehydrogenase/isomerase family protein                                                                                      |
| AT2G16530 |       | hormone metabolism.brassinosteroid.synthesis-degradation.BRs.DET2                                           | 3-oxo-5-alpha-steroid 4-dehydrogenase family protein / steroid 5-alpha-reductase family protein                                                   |
| AT4G25740 |       | protein.synthesis.ribosomal protein.eukaryotic.40S subunit.S10                                              | 40S ribosomal protein S10 (RPS10A)                                                                                                                |
| AT4G30800 |       | protein.synthesis.ribosomal protein.eukaryotic.40S subunit.S11                                              | 40S ribosomal protein S11 (RPS11B)                                                                                                                |
| AT1G15930 |       | protein.synthesis.ribosomal protein.eukaryotic.40S subunit.S12                                              | 40S ribosomal protein S12 (RPS12A)                                                                                                                |
| AT5G59850 |       | protein.synthesis.ribosomal protein.eukaryotic.40S subunit.S15A                                             | 40S ribosomal protein S15A (RPS15aF)                                                                                                              |

|           |                                                                   |                                            |
|-----------|-------------------------------------------------------------------|--------------------------------------------|
| AT2G09990 | protein.synthesis.ribosomal<br>protein.eukaryotic.40S subunit.S16 | 40S ribosomal protein S16<br>(RPS16A)      |
| AT5G18380 | protein.synthesis.ribosomal<br>protein.eukaryotic.40S subunit.S16 | 40S ribosomal protein S16<br>(RPS16C)      |
| AT3G02080 | protein.synthesis.ribosomal<br>protein.eukaryotic.40S subunit.S19 | 40S ribosomal protein S19<br>(RPS19A)      |
| AT5G61170 | protein.synthesis.ribosomal<br>protein.eukaryotic.40S subunit.S19 | 40S ribosomal protein S19<br>(RPS19C)      |
| AT2G41840 | protein.synthesis.ribosomal<br>protein.eukaryotic.40S subunit.S2  | 40S ribosomal protein S2 (RPS2C)           |
| AT3G47370 | protein.synthesis.ribosomal<br>protein.eukaryotic.40S subunit.S20 | 40S ribosomal protein S20<br>(RPS20B)      |
| AT5G62300 | protein.synthesis.ribosomal<br>protein.eukaryotic.40S subunit.S20 | 40S ribosomal protein S20<br>(RPS20C)      |
| AT5G28060 | protein.synthesis.ribosomal<br>protein.eukaryotic.40S subunit.S24 | 40S ribosomal protein S24<br>(RPS24B)      |
| AT2G21580 | protein.synthesis.ribosomal<br>protein.eukaryotic.40S subunit.S25 | 40S ribosomal protein S25<br>(RPS25B)      |
| AT4G39200 | protein.synthesis.ribosomal<br>protein.eukaryotic.40S subunit.S25 | 40S ribosomal protein S25 (RPS25E)         |
| AT2G40590 | protein.synthesis.ribosomal<br>protein.eukaryotic.40S subunit.S26 | 40S ribosomal protein S26<br>(RPS26B)      |
| AT4G33865 | protein.synthesis.ribosomal<br>protein.eukaryotic.40S subunit.S29 | 40S ribosomal protein S29<br>(RPS29C)      |
| AT2G31610 | protein.synthesis.ribosomal<br>protein.eukaryotic.40S subunit.S3  | 40S ribosomal protein S3 (RPS3A)           |
| AT5G35530 | protein.synthesis.ribosomal<br>protein.eukaryotic.40S subunit.S3  | 40S ribosomal protein S3 (RPS3C)           |
| AT3G04840 | protein.synthesis.ribosomal<br>protein.eukaryotic.40S subunit.S3A | 40S ribosomal protein S3A<br>(RPS3aA)      |
| AT4G34670 | protein.synthesis.ribosomal<br>protein.eukaryotic.40S subunit.S3A | 40S ribosomal protein S3A<br>(RPS3aB)      |
| AT5G07090 | protein.synthesis.ribosomal<br>protein.eukaryotic.40S subunit.S4  | 40S ribosomal protein S4 (RPS4B)           |
| AT1G48830 | protein.synthesis.ribosomal<br>protein.eukaryotic.40S subunit.S7  | 40S ribosomal protein S7 (RPS7A)           |
| AT3G02560 | protein.synthesis.ribosomal<br>protein.eukaryotic.40S subunit.S7  | 40S ribosomal protein S7 (RPS7B)           |
| AT5G16130 | protein.synthesis.ribosomal<br>protein.eukaryotic.40S subunit.S7  | 40S ribosomal protein S7 (RPS7C)           |
| AT5G15200 | protein.synthesis.ribosomal<br>protein.eukaryotic.40S subunit.S9  | 40S ribosomal protein S9 (RPS9B)           |
| AT3G09200 | protein.synthesis.ribosomal<br>protein.eukaryotic.60S subunit.P0  | 60S acidic ribosomal protein P0<br>(RPP0B) |
| AT1G01100 | protein.synthesis.ribosomal<br>protein.eukaryotic.60S subunit.P1  | 60S acidic ribosomal protein P1<br>(RPP1A) |
| AT4G00810 | protein.synthesis.ribosomal<br>protein.eukaryotic.60S subunit.P1  | 60S acidic ribosomal protein P1<br>(RPP1B) |
| AT5G47700 | protein.synthesis.ribosomal<br>protein.eukaryotic.60S subunit.P1  | 60S acidic ribosomal protein P1<br>(RPP1C) |
| AT2G27720 | protein.synthesis.ribosomal<br>protein.eukaryotic.60S subunit.P2  | 60S acidic ribosomal protein P2<br>(RPP2A) |

|           |        |                                                                 |                                         |
|-----------|--------|-----------------------------------------------------------------|-----------------------------------------|
| AT2G27710 | RPL10C | protein.synthesis.ribosomal protein.eukaryotic.60S subunit.P2   | 60S acidic ribosomal protein P2 (RPP2B) |
| AT1G66580 |        | protein.synthesis.ribosomal protein.eukaryotic.60S subunit.L10  | 60S ribosomal protein L10 (RPL10C)      |
| AT5G45775 |        | protein.synthesis.ribosomal protein.eukaryotic.60S subunit.L11  | 60S ribosomal protein L11 (RPL11D)      |
| AT3G53430 |        | protein.synthesis.ribosomal protein.eukaryotic.60S subunit.L12  | 60S ribosomal protein L12 (RPL12B)      |
| AT3G07110 |        | protein.synthesis.ribosomal protein.eukaryotic.60S subunit.L13A | 60S ribosomal protein L13A (RPL13aA)    |
| AT3G24830 |        | protein.synthesis.ribosomal protein.eukaryotic.60S subunit.L13A | 60S ribosomal protein L13A (RPL13aB)    |
| AT2G20450 |        | protein.synthesis.ribosomal protein.eukaryotic.60S subunit.L14  | 60S ribosomal protein L14 (RPL14A)      |
| AT4G27090 |        | protein.synthesis.ribosomal protein.eukaryotic.60S subunit.L14  | 60S ribosomal protein L14 (RPL14B)      |
| AT4G16720 |        | protein.synthesis.ribosomal protein.eukaryotic.60S subunit.L15  | 60S ribosomal protein L15 (RPL15A)      |
| AT1G27400 |        | protein.synthesis.ribosomal protein.eukaryotic.60S subunit.L17  | 60S ribosomal protein L17 (RPL17A)      |
| AT1G67430 |        | protein.synthesis.ribosomal protein.eukaryotic.60S subunit.L17  | 60S ribosomal protein L17 (RPL17B)      |
| AT2G34480 |        | protein.synthesis.ribosomal protein.eukaryotic.60S subunit.L18A | 60S ribosomal protein L18A (RPL18aB)    |
| AT3G14600 |        | protein.synthesis.ribosomal protein.eukaryotic.60S subunit.L18A | 60S ribosomal protein L18A (RPL18aC)    |
| AT1G57860 |        | protein.synthesis.ribosomal protein.eukaryotic.60S subunit.L21  | 60S ribosomal protein L21               |
| AT5G27770 |        | protein.synthesis.ribosomal protein.eukaryotic.60S subunit.L22  | 60S ribosomal protein L22 (RPL22C)      |
| AT3G05560 |        | protein.synthesis.ribosomal protein.eukaryotic.60S subunit.L22  | 60S ribosomal protein L22-2 (RPL22B)    |
| AT3G49910 |        | protein.synthesis.ribosomal protein.eukaryotic.60S subunit.L26  | 60S ribosomal protein L26 (RPL26A)      |
| AT4G15000 |        | protein.synthesis.ribosomal protein.eukaryotic.60S subunit.L27  | 60S ribosomal protein L27 (RPL27C)      |
| AT3G18740 | RLK902 | protein.synthesis.ribosomal protein.eukaryotic.60S subunit.L30  | 60S ribosomal protein L30 (RPL30C)      |
| AT4G26230 |        | protein.synthesis.ribosomal protein.eukaryotic.60S subunit.L31  | 60S ribosomal protein L31 (RPL31B)      |
| AT5G56710 |        | protein.synthesis.ribosomal protein.eukaryotic.60S subunit.L31  | 60S ribosomal protein L31 (RPL31C)      |
| AT1G26880 |        | protein.synthesis.ribosomal protein.eukaryotic.60S subunit.L34  | 60S ribosomal protein L34 (RPL34A)      |
| AT3G28900 |        | protein.synthesis.ribosomal protein.eukaryotic.60S subunit.L34  | 60S ribosomal protein L34 (RPL34C)      |

|               |                |                                                                        |                                                                                                                                   |
|---------------|----------------|------------------------------------------------------------------------|-----------------------------------------------------------------------------------------------------------------------------------|
| AT3G557<br>50 | ABCG2          | protein.synthesis.ribosomal<br>protein.eukaryotic.60S<br>subunit.L35A  | 60S ribosomal protein L35a<br>(RPL35aD)                                                                                           |
| AT3G537<br>40 |                | protein.synthesis.ribosomal<br>protein.eukaryotic.60S subunit.L36      | 60S ribosomal protein L36 (RPL36B)                                                                                                |
| AT3G109<br>50 |                | protein.synthesis.ribosomal<br>protein.eukaryotic.60S<br>subunit.L37A  | 60S ribosomal protein L37a<br>(RPL37aB)                                                                                           |
| AT3G595<br>40 |                | protein.synthesis.ribosomal<br>protein.eukaryotic.60S subunit.L38      | 60S ribosomal protein L38 (RPL38B)                                                                                                |
| AT4G319<br>85 |                | protein.synthesis.ribosomal<br>protein.eukaryotic.60S subunit.L39      | 60S ribosomal protein L39 (RPL39C)                                                                                                |
| AT1G185<br>40 |                | protein.synthesis.ribosomal<br>protein.eukaryotic.60S subunit.L6       | 60S ribosomal protein L6 (RPL6A)                                                                                                  |
| AT2G183<br>30 |                | protein.degradation.AAA type                                           | AAA-type ATPase family protein                                                                                                    |
| AT2G373<br>60 |                | transport.ABC transporters and<br>multidrug resistance systems         | ABC transporter family protein                                                                                                    |
| AT4G285<br>70 |                | not assigned.no ontology                                               | alcohol oxidase-related                                                                                                           |
| AT5G070<br>30 |                | RNA.regulation of<br>transcription.putative transcription<br>regulator | aspartic-type endopeptidase                                                                                                       |
| AT1G119<br>10 | APA1           | protein.degradation.aspartate<br>protease                              | aspartyl protease family protein                                                                                                  |
| AT3G030<br>60 |                | protein.degradation.ubiquitin.prot<br>easom                            | ATP binding / ATPase/ nucleoside-<br>triphosphatase/ nucleotide binding                                                           |
| AT1G635<br>00 | Cpn60beta<br>3 | signalling.kinase.RLCK.brassinoster<br>oid signalling kinase           | ATP binding / binding / protein<br>kinase/ protein serine/threonine<br>kinase/ protein tyrosine kinase                            |
| AT5G565<br>00 |                | protein.folding                                                        | ATP binding / protein binding                                                                                                     |
| AT2G076<br>98 |                | mitochondrial electron transport /<br>ATP synthesis.F1-ATPase          | ATP synthase alpha chain,<br>mitochondrial, putative                                                                              |
| AT5G470<br>30 |                | mitochondrial electron transport /<br>ATP synthesis.F1-ATPase          | ATP synthase delta' chain,<br>mitochondrial                                                                                       |
| AT5G134<br>50 | ATP5           | mitochondrial electron transport /<br>ATP synthesis.F1-ATPase          | ATP synthase delta chain,<br>mitochondrial, putative / H(+)-<br>transporting two-sector ATPase,<br>delta (OSCP) subunit, putative |
| AT1G516<br>50 |                | mitochondrial electron transport /<br>ATP synthesis.F1-ATPase          | ATP synthase epsilon chain,<br>mitochondrial                                                                                      |
| AT2G330<br>40 | ATP3           | mitochondrial electron transport /<br>ATP synthesis.F1-ATPase          | ATP synthase gamma chain,<br>mitochondrial (ATPC)                                                                                 |
| AT5G236<br>30 |                | transport.unspecified cations                                          | ATPase E1-E2 type family protein /<br>haloacid dehalogenase-like<br>hydrolase familiy protein                                     |
| AT3G252<br>90 | MIA            | hormone<br>metabolism.auxin.induced-<br>regulated-responsive-activated | auxin-responsive family protein                                                                                                   |

|           |        |                                                                                        |                                                    |
|-----------|--------|----------------------------------------------------------------------------------------|----------------------------------------------------|
| AT5G35735 | AtHIR2 | hormone<br>metabolism.auxin.induced-<br>regulated-responsive-activated                 | auxin-responsive family protein                    |
| AT1G69840 |        | not assigned.no ontology                                                               | band 7 family protein                              |
| AT2G03510 |        | not assigned.no ontology                                                               | band 7 family protein                              |
| AT3G01290 |        | not assigned.no ontology                                                               | band 7 family protein                              |
| AT4G27585 |        | not assigned.no ontology                                                               | band 7 family protein                              |
| AT5G51570 |        | not assigned.no ontology                                                               | band 7 family protein                              |
| AT5G54100 |        | not assigned.no ontology                                                               | band 7 family protein                              |
| AT5G62740 | ATHIR1 | not assigned.no ontology                                                               | band 7 family protein                              |
| AT1G64790 | ILA    | protein.synthesis                                                                      | binding                                            |
| AT2G01690 |        | not assigned.unknown                                                                   | binding                                            |
| AT3G04830 |        | not assigned.unknown                                                                   | binding                                            |
| AT3G56210 |        | not assigned.unknown                                                                   | binding                                            |
| AT5G41950 |        | not assigned.unknown                                                                   | binding                                            |
| AT5G39410 |        | not assigned.unknown                                                                   | binding / catalytic                                |
| AT2G20360 |        | mitochondrial electron transport /<br>ATP synthesis.NADH-<br>DH.localisation not clear | binding / catalytic/ coenzyme<br>binding           |
| AT5G10730 |        | not assigned.unknown                                                                   | binding / catalytic/ coenzyme<br>binding           |
| AT3G03305 |        | misc.calcineurin-like<br>phosphoesterase family protein                                | calcineurin-like phosphoesterase<br>family protein |
| AT1G05150 |        | signalling.calcium                                                                     | calcium-binding EF hand family<br>protein          |
| AT1G65540 | AtCLO4 | signalling.calcium                                                                     | calcium-binding EF hand family<br>protein          |
| AT5G08580 |        | signalling.calcium                                                                     | calcium-binding EF hand family<br>protein          |
| AT3G59820 |        | signalling.calcium                                                                     | calcium-binding mitochondrial<br>protein-related   |
| AT1G70670 |        | development.unspecified                                                                | caleosin-related family protein                    |
| AT3G29310 |        | signalling.calcium                                                                     | calmodulin-binding protein-related                 |
| AT2G25310 |        | not assigned.unknown                                                                   | carbohydrate binding                               |
| AT3G62360 |        | not assigned.unknown                                                                   | carbohydrate binding                               |

|           |            |                                                                            |                                                                                            |
|-----------|------------|----------------------------------------------------------------------------|--------------------------------------------------------------------------------------------|
| AT5G11560 |            | not assigned.no ontology                                                   | catalytic                                                                                  |
| AT5G49900 |            | not assigned.unknown                                                       | catalytic/ glucosylceramidase                                                              |
| AT3G52950 |            | not assigned.no ontology                                                   | CBS domain-containing protein / octicosapeptide/Phox/Bemp1 (PB1) domain-containing protein |
| AT1G63110 |            | cell.division                                                              | cell division cycle protein-related                                                        |
| AT3G03960 |            | protein.folding                                                            | chaperonin, putative                                                                       |
| AT3G11830 |            | protein.folding                                                            | chaperonin, putative                                                                       |
| AT3G13470 | Cpn60beta2 | protein.folding                                                            | chaperonin, putative                                                                       |
| AT3G02530 |            | protein.folding                                                            | chaperonin, putative                                                                       |
| AT3G18190 |            | protein.folding                                                            | chaperonin, putative                                                                       |
| AT5G20890 |            | protein.folding                                                            | chaperonin, putative                                                                       |
| AT5G26360 |            | protein.folding                                                            | chaperonin, putative                                                                       |
| AT4G18060 |            | not assigned.no ontology                                                   | clathrin binding                                                                           |
| AT3G08530 |            | cell.vesicle transport                                                     | clathrin heavy chain, putative                                                             |
| AT3G11130 |            | cell.vesicle transport                                                     | clathrin heavy chain, putative                                                             |
| AT4G31490 |            | cell.vesicle transport                                                     | coatamer beta subunit, putative / beta-coat protein, putative / beta-COP, putative         |
| AT1G62020 |            | cell.vesicle transport                                                     | coatamer protein complex, subunit alpha, putative                                          |
| AT2G21390 |            | cell.vesicle transport                                                     | coatamer protein complex, subunit alpha, putative                                          |
| AT1G30630 |            | cell.vesicle transport                                                     | coatamer protein epsilon subunit family protein / COPE family protein                      |
| AT4G33120 |            | lipid metabolism.Phospholipid synthesis.(S)-coclaurine-N-methyltransferase | coclaurine N-methyltransferase, putative                                                   |
| AT3G12260 |            | mitochondrial electron transport / ATP synthesis.NADH-DH.complex I         | complex 1 family protein / LVR family protein                                              |
| AT4G34700 | AtCIB22    | mitochondrial electron transport / ATP synthesis                           | complex 1 family protein / LVR family protein                                              |
| AT1G18420 |            | not assigned.unknown                                                       | Uncharacterised protein matching with AtALMT9 (aluminum-activated malate transporter 9)    |
| AT1G53000 | AtCKS      | cell wall.precursor synthesis.KDO pathway.CMP-KDO Synthetase               | cytidyltransferase family                                                                  |



|           |       |                                                                       |                                                                                                                                                    |
|-----------|-------|-----------------------------------------------------------------------|----------------------------------------------------------------------------------------------------------------------------------------------------|
| AT2G47380 | QUA3  | mitochondrial electron transport / ATP synthesis.cytochrome c oxidase | cytochrome c oxidase subunit Vc family protein / COX5C family protein                                                                              |
| AT3G27240 |       | mitochondrial electron transport / ATP synthesis.cytochrome c oxidase | cytochrome c1, putative                                                                                                                            |
| AT5G40810 |       | mitochondrial electron transport / ATP synthesis.cytochrome c oxidase | cytochrome c1, putative                                                                                                                            |
| AT4G21105 |       | not assigned.unknown                                                  | cytochrome-c oxidase/ electron carrier                                                                                                             |
| AT1G26850 |       | stress.abiotic.drought/salt                                           | dehydration-responsive family protein                                                                                                              |
| AT4G18030 |       | stress.abiotic.drought/salt                                           | dehydration-responsive family protein                                                                                                              |
| AT1G29470 |       | stress.abiotic.drought/salt                                           | dehydration-responsive protein-related                                                                                                             |
| AT1G04430 |       | stress.abiotic.drought/salt                                           | dehydration-responsive protein-related                                                                                                             |
| AT4G00740 |       | stress.abiotic.drought/salt                                           | dehydration-responsive protein-related                                                                                                             |
| AT5G64030 |       | stress.abiotic.drought/salt                                           | dehydration-responsive protein-related                                                                                                             |
| AT5G15910 |       | not assigned.no ontology                                              | dehydrogenase-related                                                                                                                              |
| AT5G19760 |       | transport.metabolite transporters at the mitochondrial membrane       | dicarboxylate/tricarboxylate carrier (DTC)                                                                                                         |
| AT3G13930 |       | TCA / org transformation.TCA.pyruvate DH.E2                           | dihydrolipoamide S-acetyltransferase, putative                                                                                                     |
| AT5G67630 |       | DNA.synthesis/chromatin structure                                     | DNA helicase, putative                                                                                                                             |
| AT2G24420 |       | DNA.repair                                                            | DNA repair ATPase-related                                                                                                                          |
| AT2G45820 | OWL1  | RNA.regulation of transcription.putative transcription regulator      | DNA-binding protein, putative                                                                                                                      |
| AT1G21080 |       | stress.abiotic.heat                                                   | DNAJ heat shock N-terminal domain-containing protein                                                                                               |
| AT2G35720 |       | stress.abiotic.heat                                                   | DNAJ heat shock N-terminal domain-containing protein                                                                                               |
| AT4G39150 |       | stress.abiotic.heat                                                   | DNAJ heat shock N-terminal domain-containing protein                                                                                               |
| AT1G20575 | DPMS1 | protein.glycosylation                                                 | dolichyl-phosphate beta-D-mannosyltransferase, putative / dolichol-phosphate mannosyltransferase, putative / mannose-P-dolichol synthase, putative |
| AT5G54830 |       | misc.oxidases - copper, flavone etc                                   | DOMON domain-containing protein / dopamine beta-monooxygenase N-terminal domain-containing protein                                                 |

|           |        |                                                                                     |                                                                                                |
|-----------|--------|-------------------------------------------------------------------------------------|------------------------------------------------------------------------------------------------|
| AT5G25940 | HCC1   | development.unspecified                                                             | early nodulin-related                                                                          |
| AT5G42150 |        | not assigned.unknown                                                                | electron carrier/ protein disulfide oxidoreductase                                             |
| AT3G08950 |        | mitochondrial electron transport / ATP synthesis.cytochrome c oxidase               | electron transport SCO1/SenC family protein                                                    |
| AT1G30230 |        | protein.synthesis.elongation                                                        | elongation factor 1-beta / EF-1-beta                                                           |
| AT1G57720 |        | protein.synthesis.elongation                                                        | elongation factor 1B-gamma, putative / eEF-1B gamma, putative                                  |
| AT1G09640 |        | protein.synthesis.elongation                                                        | elongation factor 1B-gamma, putative / eEF-1B gamma, putative                                  |
| AT1G69460 |        | transport.misc                                                                      | emp24/gp25L/p24 family protein                                                                 |
| AT3G22845 | AtTMN1 | cell.vesicle transport                                                              | emp24/gp25L/p24 protein-related                                                                |
| AT1G10950 |        | not assigned.no ontology                                                            | endomembrane protein 70, putative                                                              |
| AT1G14670 |        | not assigned.no ontology                                                            | endomembrane protein 70, putative                                                              |
| AT2G01970 |        | not assigned.no ontology                                                            | endomembrane protein 70, putative                                                              |
| AT3G13772 |        | not assigned.unknown                                                                | endomembrane protein 70, putative                                                              |
| AT5G10840 |        | not assigned.unknown                                                                | endomembrane protein 70, putative                                                              |
| AT5G25100 |        | not assigned.no ontology                                                            | endomembrane protein 70, putative                                                              |
| AT2G25430 | AtTMN7 | not assigned.no ontology.epsin N-terminal homology (ENTH) domain-containing protein | epsin N-terminal homology (ENTH) domain-containing protein                                     |
| AT2G01600 |        | not assigned.no ontology.epsin N-terminal homology (ENTH) domain-containing protein | epsin N-terminal homology (ENTH) domain-containing protein                                     |
| AT4G32285 |        | not assigned.no ontology.epsin N-terminal homology (ENTH) domain-containing protein | epsin N-terminal homology (ENTH) domain-containing protein / clathrin assembly protein-related |
| AT2G39420 |        | not assigned.no ontology                                                            | esterase/lipase/thioesterase family protein                                                    |
| AT5G19290 |        | not assigned.no ontology                                                            | esterase/lipase/thioesterase family protein                                                    |
| AT1G09740 |        | hormone metabolism.ethylene.induced-regulated-responsive-activated                  | ethylene-responsive protein, putative                                                          |
| AT1G42960 |        | not assigned.unknown                                                                | expressed protein localized to the inner membrane of the chloroplast.                          |
| AT3G51050 |        | not assigned.no ontology                                                            | FG-GAP repeat-containing protein                                                               |
| AT1G75200 |        | not assigned.no ontology                                                            | flavodoxin family protein / radical SAM domain-containing protein                              |

|           |       |                                                              |                                                                                   |
|-----------|-------|--------------------------------------------------------------|-----------------------------------------------------------------------------------|
| AT2G22900 | PGL2  | misc.UDP glucosyl and glucoronyl transferases                | galactosyl transferase<br>GMA12/MNN10 family protein                              |
| AT3G49360 |       | OPP.oxidative PP-6-phosphogluconolactonase                   | glucosamine/galactosamine-6-phosphate isomerase family protein                    |
| AT1G67930 |       | cell.vesicle transport                                       | Golgi transport complex protein-related                                           |
| AT5G46070 |       | signalling.G-proteins                                        | GTP binding / GTPase                                                              |
| AT3G28710 |       | transport.p- and v-ATPases.H+-transporting two-sector ATPase | H+-transporting two-sector ATPase, putative                                       |
| AT3G25610 | ALA2  | transport.p- and v-ATPases                                   | haloacid dehalogenase-like hydrolase family protein                               |
| AT5G44240 |       | transport.p- and v-ATPases                                   | haloacid dehalogenase-like hydrolase family protein                               |
| AT1G08160 |       | not assigned.no ontology                                     | harpin-induced protein-related / HIN1-related / harpin-responsive protein-related |
| AT4G35060 |       | metal handling.binding, chelation and storage                | heavy-metal-associated domain-containing protein / copper chaperone (CCH)-related |
| AT4G38350 |       | not assigned.no ontology                                     | hedgehog receptor                                                                 |
| AT1G09870 | HIP25 | misc.acid and other phosphatases                             | histidine acid phosphatase family protein                                         |
| AT5G10980 |       | DNA.synthesis/chromatin structure.histone.core.H3            | histone H3                                                                        |
| AT5G59970 |       | DNA.synthesis/chromatin structure.histone.core.H4            | histone H4                                                                        |
| AT3G27325 |       | not assigned.unknown                                         | hydrolase, acting on ester bonds                                                  |
| AT2G36290 |       | not assigned.no ontology                                     | hydrolase, alpha/beta fold family protein                                         |
| AT3G48410 |       | not assigned.no ontology                                     | hydrolase, alpha/beta fold family protein                                         |
| AT2G32600 |       | not assigned.no ontology.hydroxyproline rich proteins        | hydroxyproline-rich glycoprotein family protein                                   |
| AT4G23470 |       | not assigned.no ontology.hydroxyproline rich proteins        | hydroxyproline-rich glycoprotein family protein                                   |
| AT5G27760 |       | not assigned.no ontology                                     | hypoxia-responsive family protein                                                 |
| AT2G36100 | CASP1 | not assigned.no ontology                                     | integral membrane family protein                                                  |
| AT3G11550 | CASP2 | not assigned.no ontology                                     | integral membrane family protein                                                  |
| AT4G27860 |       | not assigned.no ontology                                     | integral membrane family protein                                                  |
| AT4G27870 |       | not assigned.no ontology                                     | integral membrane family protein                                                  |
| AT4G15610 |       | not assigned.no ontology                                     | integral membrane family protein                                                  |

|           |         |                                                                   |                                                                            |
|-----------|---------|-------------------------------------------------------------------|----------------------------------------------------------------------------|
| AT1G75220 | AtERDL6 | transport.sugars                                                  | integral membrane protein, putative                                        |
| AT2G38480 |         | not assigned.no ontology                                          | integral membrane protein, putative                                        |
| AT3G05280 |         | not assigned.no ontology                                          | integral membrane Yip1 family protein                                      |
| AT3G52760 |         | not assigned.no ontology                                          | integral membrane Yip1 family protein                                      |
| AT4G30260 |         | not assigned.no ontology                                          | integral membrane Yip1 family protein                                      |
| AT1G72500 |         | stress.biotic.PR-proteins.proteinase inhibitors.trypsin inhibitor | inter-alpha-trypsin inhibitor heavy chain-related                          |
| AT1G19110 |         | stress.biotic.PR-proteins.proteinase inhibitors.trypsin inhibitor | inter-alpha-trypsin inhibitor heavy chain-related                          |
| AT5G66060 |         | misc.oxidases - copper, flavone etc                               | iron ion binding / oxidoreductase/ oxidoreductase, acting on paired donors |
| AT2G37050 |         | signalling.receptor kinases.leucine rich repeat I                 | kinase                                                                     |
| AT4G08850 |         | signalling.receptor kinases.leucine rich repeat XI                | kinase                                                                     |
| AT1G54320 | PIRL5   | not assigned.no ontology                                          | LEM3 (ligand-effect modulator 3) family protein / CDC50 family protein     |
| AT3G23190 |         | stress.biotic                                                     | lesion inducing protein-related                                            |
| AT2G17440 |         | not assigned.no ontology                                          | leucine-rich repeat family protein                                         |
| AT4G35470 |         | signalling.receptor kinases                                       | leucine-rich repeat family protein                                         |
| AT5G45510 |         | not assigned.no ontology                                          | leucine-rich repeat family protein                                         |
| AT5G07910 |         | not assigned.no ontology                                          | leucine-rich repeat family protein                                         |
| AT1G56140 |         | signalling.receptor kinases.leucine rich repeat VIII.VIII-2       | leucine-rich repeat family protein / protein kinase family protein         |
| AT1G56145 |         | signalling.receptor kinases.DUF 26                                | leucine-rich repeat family protein / protein kinase family protein         |
| AT3G14840 |         | signalling.receptor kinases.DUF 26                                | leucine-rich repeat family protein / protein kinase family protein         |
| AT3G23750 |         | signalling.receptor kinases.leucine rich repeat IX                | leucine-rich repeat family protein / protein kinase family protein         |
| AT5G48380 | BIR1    | signalling.receptor kinases.leucine rich repeat X                 | leucine-rich repeat family protein / protein kinase family protein         |
| AT5G49760 |         | signalling.receptor kinases.leucine rich repeat VIII.VIII-1       | leucine-rich repeat family protein / protein kinase family protein         |
| AT1G51800 | IOS1    | signalling.receptor kinases.leucine rich repeat I                 | leucine-rich repeat protein kinase, putative                               |
| AT1G51850 |         | signalling.receptor kinases.leucine rich repeat I                 | leucine-rich repeat protein kinase, putative                               |

|           |         |                                                                                  |                                                                                                          |
|-----------|---------|----------------------------------------------------------------------------------|----------------------------------------------------------------------------------------------------------|
| AT1G25570 |         | not assigned.no ontology                                                         | leucine-rich repeat protein-related                                                                      |
| AT1G06840 |         | signalling.receptor kinases.leucine rich repeat VIII.VIII-1                      | leucine-rich repeat transmembrane protein kinase, putative                                               |
| AT1G27190 |         | signalling.receptor kinases.leucine rich repeat X                                | leucine-rich repeat transmembrane protein kinase, putative                                               |
| AT2G31880 | EVR     | signalling.receptor kinases.leucine rich repeat XI                               | leucine-rich repeat transmembrane protein kinase, putative                                               |
| AT3G28450 |         | signalling.receptor kinases.leucine rich repeat X                                | leucine-rich repeat transmembrane protein kinase, putative                                               |
| AT3G02880 |         | signalling.receptor kinases.leucine rich repeat III                              | leucine-rich repeat transmembrane protein kinase, putative                                               |
| AT5G49770 |         | signalling.receptor kinases.leucine rich repeat VIII.VIII-1                      | leucine-rich repeat transmembrane protein kinase, putative                                               |
| AT5G37710 |         | signalling.calcium                                                               | lipase class 3 family protein / calmodulin-binding heat-shock protein, putative                          |
| AT1G67560 | ATLOX6  | hormone metabolism.jasmonate.synthesis-degradation.lipoxygenase                  | lipoxygenase family protein                                                                              |
| AT2G04350 | LACS8   | lipid metabolism.FA synthesis and FA elongation.long chain fatty acid CoA ligase | long-chain-fatty-acid--CoA ligase family protein / long-chain acyl-CoA synthetase family protein (LACS8) |
| AT1G51590 | MANIB   | protein.glycosylation.mannosyl-oligosaccharide alpha-1,2-mannosidase             | mannosyl-oligosaccharide 1,2-alpha-mannosidase, putative                                                 |
| AT4G25640 | ATDTX35 | transport.misc                                                                   | MATE efflux family protein                                                                               |
| AT4G00290 |         | not assigned.no ontology                                                         | mechanosensitive ion channel domain-containing protein / MS ion channel domain-containing protein        |
| AT1G12640 |         | not assigned.no ontology                                                         | membrane bound O-acyl transferase (MBOAT) family protein                                                 |
| AT3G07570 |         | not assigned.no ontology                                                         | membrane protein, putative                                                                               |
| AT5G64500 |         | not assigned.no ontology                                                         | membrane protein-related                                                                                 |
| AT2G16460 |         | not assigned.unknown                                                             | metal ion binding                                                                                        |
| AT2G19080 |         | protein.targeting.mitochondria                                                   | metaxin-related                                                                                          |
| AT2G39960 |         | protein.targeting.secretory pathway.ER                                           | microsomal signal peptidase 25 kDa subunit, putative (SPC25)                                             |
| AT2G19680 |         | mitochondrial electron transport / ATP synthesis.F1-ATPase                       | mitochondrial ATP synthase g subunit family protein                                                      |
| AT4G26210 |         | mitochondrial electron transport / ATP synthesis.F1-ATPase                       | mitochondrial ATP synthase g subunit family protein                                                      |
| AT4G29480 |         | mitochondrial electron transport / ATP synthesis.F1-ATPase                       | mitochondrial ATP synthase g subunit family protein                                                      |

|           |        |                                                                                 |                                                                                          |
|-----------|--------|---------------------------------------------------------------------------------|------------------------------------------------------------------------------------------|
| AT3G49560 | PHT3;1 | protein.targeting.mitochondria                                                  | mitochondrial import inner membrane translocase subunit Tim17/Tim22/Tim23 family protein |
| AT5G14040 |        | transport.metabolite transporters at the mitochondrial membrane                 | mitochondrial phosphate transporter                                                      |
| AT1G51980 |        | protein.targeting.mitochondria                                                  | mitochondrial processing peptidase alpha subunit, putative                               |
| AT5G01500 | TAAC   | transport.metabolite transporters at the mitochondrial membrane                 | mitochondrial substrate carrier family protein                                           |
| AT5G15640 |        | transport.metabolite transporters at the mitochondrial membrane                 | mitochondrial substrate carrier family protein                                           |
| AT4G38540 |        | misc.oxidases - copper, flavone etc                                             | monooxygenase, putative (MO2)                                                            |
| AT4G31340 |        | cell.organisation                                                               | myosin heavy chain-related                                                               |
| AT3G03100 |        | mitochondrial electron transport / ATP synthesis.NADH-DH.localisation not clear | NADH:ubiquinone oxidoreductase family protein                                            |
| AT5G18800 |        | mitochondrial electron transport / ATP synthesis.NADH-DH.localisation not clear | NADH-ubiquinone oxidoreductase 19 kDa subunit (NDUFA8) family protein                    |
| AT5G11770 |        | mitochondrial electron transport / ATP synthesis.NADH-DH.localisation not clear | NADH-ubiquinone oxidoreductase 20 kDa subunit, mitochondrial                             |
| AT1G79010 |        | mitochondrial electron transport / ATP synthesis.NADH-DH.localisation not clear | NADH-ubiquinone oxidoreductase 23 kDa subunit, mitochondrial (TYKY)                      |
| AT1G16700 |        | mitochondrial electron transport / ATP synthesis.NADH-DH.localisation not clear | NADH-ubiquinone oxidoreductase 23 kDa subunit, mitochondrial, putative                   |
| AT4G02580 |        | mitochondrial electron transport / ATP synthesis.NADH-DH.localisation not clear | NADH-ubiquinone oxidoreductase 24 kDa subunit, putative                                  |
| AT5G47890 |        | mitochondrial electron transport / ATP synthesis.NADH-DH.localisation not clear | NADH-ubiquinone oxidoreductase B8 subunit, putative                                      |
| AT3G18410 |        | mitochondrial electron transport / ATP synthesis.NADH-DH.localisation not clear | NADH-ubiquinone oxidoreductase-related                                                   |
| AT5G52840 |        | mitochondrial electron transport / ATP synthesis.NADH-DH.localisation not clear | NADH-ubiquinone oxidoreductase-related                                                   |
| AT5G14120 |        | development.unspecified                                                         | nodulin family protein                                                                   |
| AT5G06260 |        | DNA.synthesis/chromatin structure                                               | nucleolar protein-related                                                                |
| AT1G61790 |        | transport.sugars                                                                | OST3/OST6 family protein                                                                 |
| AT3G11070 |        | not assigned.no ontology                                                        | outer membrane OMP85 family protein                                                      |
| AT5G05520 |        | not assigned.no ontology                                                        | outer membrane OMP85 family protein                                                      |

|           |       |                                                             |                                                                                      |
|-----------|-------|-------------------------------------------------------------|--------------------------------------------------------------------------------------|
| AT2G17720 | P4H5  | misc.oxidases - copper, flavone etc                         | oxidoreductase, 2OG-Fe(II) oxygenase family protein                                  |
| AT3G28480 |       | misc.oxidases - copper, flavone etc                         | oxidoreductase, 2OG-Fe(II) oxygenase family protein                                  |
| AT3G15090 |       | not assigned.no ontology                                    | oxidoreductase, zinc-binding dehydrogenase family protein                            |
| AT4G13010 |       | misc.oxidases - copper, flavone etc                         | oxidoreductase, zinc-binding dehydrogenase family protein                            |
| AT5G03700 |       | not assigned.no ontology                                    | PAN domain-containing protein                                                        |
| AT4G19410 |       | cell wall.pectin*esterases.acetyl esterase                  | pectinacetylerase, putative                                                          |
| AT5G56730 |       | protein.degradation.metalloprotease                         | peptidase M16 family protein / insulinase family protein                             |
| AT5G51740 |       | protein.degradation                                         | peptidase M48 family protein                                                         |
| AT3G66654 |       | cell.cycle.peptidylprolyl isomerase                         | peptidyl-prolyl cis-trans isomerase cyclophilin-type family protein                  |
| AT5G17820 |       | misc.peroxidases                                            | peroxidase 57 (PER57) (P57) (PRXR10)                                                 |
| AT1G49570 |       | misc.peroxidases                                            | peroxidase, putative                                                                 |
| AT4G26010 |       | misc.peroxidases                                            | peroxidase, putative                                                                 |
| AT5G03080 |       | misc.acid and other phosphatases                            | phosphatidic acid phosphatase-related / PAP2-related                                 |
| AT1G17340 |       | signalling.phosphoinositides                                | phosphoinositide phosphatase family protein                                          |
| AT3G23400 | FIB4  | cell.organisation                                           | plastid-lipid associated protein PAP / fibrillin family protein                      |
| AT1G63830 |       | not assigned.no ontology.proline rich family                | proline-rich family protein                                                          |
| AT3G02200 |       | protein.degradation.ubiquitin.proteasom                     | proteasome family protein                                                            |
| AT2G20790 |       | cell.vesicle transport                                      | protein binding                                                                      |
| AT2G40060 | CLC2  | not assigned.unknown                                        | protein binding / structural molecule                                                |
| AT2G20760 |       | not assigned.unknown                                        | protein binding / structural molecule                                                |
| AT3G51890 |       | not assigned.unknown                                        | protein binding / structural molecule                                                |
| AT2G23770 |       | signalling.receptor kinases.lysine motif                    | protein kinase family protein / peptidoglycan-binding LysM domain-containing protein |
| AT1G52540 | HERK1 | signalling.kinase.RLCK.receptor like cytoplasmatic kinase X | protein kinase, putative                                                             |
| AT3G46290 |       | kinases.Catharanthus roseus-like RLK1                       | protein kinase, putative                                                             |
| AT5G50000 |       | signalling.MAP kinases.putative MAP3K, Raf-like             | protein kinase, putative                                                             |

|           |             |                                                              |                                                              |
|-----------|-------------|--------------------------------------------------------------|--------------------------------------------------------------|
| AT3G46280 |             | signalling.receptor kinases.misc                             | protein kinase-related                                       |
| AT3G48570 |             | protein.targeting.secretory pathway.unspecified              | protein transport protein SEC61 gamma subunit, putative      |
| AT5G50460 |             | protein.targeting.secretory pathway.unspecified              | protein transport protein SEC61 gamma subunit, putative      |
| AT2G34250 |             | protein.targeting.secretory pathway.unspecified              | protein transport protein sec61, putative                    |
| AT3G44190 |             | not assigned.no ontology                                     | pyridine nucleotide-disulphide oxidoreductase family protein |
| AT4G33070 |             | fermentation.PDC                                             | pyruvate decarboxylase, putative                             |
| AT5G56350 |             | glycolysis.plastid branch.pyruvate kinase (PK)               | pyruvate kinase, putative                                    |
| AT4G36750 |             | lipid metabolism.'exotics'(steroids, squalene etc)           | quinone reductase family protein                             |
| AT1G15530 |             | signalling.receptor kinases.legume-lectin                    | receptor lectin kinase, putative                             |
| AT5G23750 |             | cell.organization.remorin                                    | remorin family protein                                       |
| AT3G10260 |             | not assigned.no ontology                                     | reticulon family protein                                     |
| AT1G64090 | RTNLB3      | not assigned.no ontology                                     | reticulon family protein (RTNLB3)                            |
| AT3G07950 |             | protein.degradation.serine protease                          | rhomboid protein-related                                     |
| AT1G76400 |             | protein.glycosylation                                        | ribophorin I family protein                                  |
| AT2G01720 |             | protein.glycosylation                                        | ribophorin I family protein                                  |
| AT3G49080 |             | protein.synthesis.ribosomal protein.unknown.small subunit.S9 | ribosomal protein S9 family protein                          |
| AT4G17720 |             | RNA.RNA binding                                              | RNA recognition motif (RRM)-containing protein               |
| AT1G72960 |             | development.unspecified                                      | root hair defective 3 GTP-binding (RHD3) family protein      |
| AT3G05500 |             | not assigned.no ontology                                     | rubber elongation factor (REF) family protein                |
| AT5G04990 | ATSUN1      | not assigned.no ontology                                     | sad1/unc-84 protein-related                                  |
| AT2G04940 |             | not assigned.no ontology                                     | scramblase-related                                           |
| AT1G32050 |             | transport.misc                                               | secretory carrier membrane protein (SCAMP) family protein    |
| AT5G58640 |             | metal handling                                               | selenoprotein-related                                        |
| AT1G31440 |             | cell.vesicle transport                                       | SH3 domain-containing protein 1 (SH3P1)                      |
| AT4G23430 | AtTic32-IVa | misc.short chain dehydrogenase/reductase (SDR)               | short-chain dehydrogenase/reductase (SDR) family protein     |



|           |       |                                                                                      |                                                                                                |
|-----------|-------|--------------------------------------------------------------------------------------|------------------------------------------------------------------------------------------------|
| AT4G09750 |       | misc.short chain dehydrogenase/reductase (SDR)                                       | short-chain dehydrogenase/reductase (SDR) family protein                                       |
| AT3G05230 |       | protein.degradation                                                                  | signal peptidase subunit family protein                                                        |
| AT5G05670 |       | protein.targeting.secretory pathway.unspecified                                      | signal recognition particle binding                                                            |
| AT4G30600 |       | protein.targeting.secretory pathway.unspecified                                      | signal recognition particle receptor alpha subunit family protein                              |
| AT1G53210 |       | signalling.calcium                                                                   | sodium/calcium exchanger family protein / calcium-binding EF hand family protein               |
| AT1G63010 |       | not assigned.no ontology                                                             | SPX (SYG1/Pho81/XPR1) domain-containing protein                                                |
| AT1G08470 | SSL3  | secondary metabolism.N misc.alkaloid-like                                            | strictosidine synthase family protein                                                          |
| AT3G51440 |       | secondary metabolism.N misc.alkaloid-like                                            | strictosidine synthase family protein                                                          |
| AT3G57010 |       | secondary metabolism.N misc.alkaloid-like                                            | strictosidine synthase family protein                                                          |
| AT1G70600 |       | protein.synthesis.ribosomal protein.eukaryotic.60S subunit.L27A                      | structural constituent of ribosome                                                             |
| AT1G16900 |       | protein.postranslational modification                                                | sugar binding / transferase, transferring glycosyl groups                                      |
| AT1G18260 | EBS5  | not assigned.no ontology                                                             | suppressor of lin-12-like protein-related / sel-1 protein-related                              |
| AT1G24510 |       | protein.postranslational modification                                                | T-complex protein 1 epsilon subunit, putative / TCP-1-epsilon, putative / chaperonin, putative |
| AT4G33360 | FLDH  | secondary metabolism.flavonoids.dihydroflavonols                                     | terpene cyclase/mutase-related                                                                 |
| AT5G21990 | OEP61 | not assigned.no ontology.tetratricopeptide repeat (TPR)                              | tetratricopeptide repeat (TPR)-containing protein                                              |
| AT5G44920 |       | not assigned.no ontology.Toll-Interleukin-Resistance (TIR) domain-containing protein | Toll-Interleukin-Resistance (TIR) domain-containing protein                                    |
| AT4G00090 |       | development.unspecified                                                              | transducin family protein / WD-40 repeat family protein                                        |
| AT3G20920 |       | not assigned.no ontology                                                             | translocation protein-related                                                                  |
| AT2G21160 |       | not assigned.no ontology                                                             | translocon-associated protein alpha (TRAP alpha) family protein                                |
| AT5G14030 |       | not assigned.no ontology                                                             | translocon-associated protein beta (TRAPB) family protein                                      |
| AT5G23575 |       | not assigned.no ontology                                                             | transmembrane protein, putative                                                                |
| AT5G54750 |       | transport.misc                                                                       | transport protein particle (TRAPP) component Bet3, putative                                    |

|           |         |                                                                                    |                                                                                                                                                    |
|-----------|---------|------------------------------------------------------------------------------------|----------------------------------------------------------------------------------------------------------------------------------------------------|
| AT4G25220 | AtG3Pp2 | transport.membrane system unknown                                                  | transporter, putative                                                                                                                              |
| AT1G06890 |         | not assigned.no ontology                                                           | transporter-related                                                                                                                                |
| AT1G76880 |         | RNA.regulation of transcription.Trihelix, Triple-Helix transcription factor family | trihelix DNA-binding protein, putative                                                                                                             |
| AT3G62120 |         | protein.aa activation.bifunctional aminoacyl-tRNA synthetase                       | tRNA synthetase class II (G, H, P and S) family protein                                                                                            |
| AT5G51220 |         | protein.targeting.unknown                                                          | ubiquinol-cytochrome C chaperone family protein                                                                                                    |
| AT4G32470 |         | mitochondrial electron transport / ATP synthesis.cytochrome c reductase            | ubiquinol-cytochrome C reductase complex 14 kDa protein, putative                                                                                  |
| AT5G25450 |         | mitochondrial electron transport / ATP synthesis.cytochrome c reductase            | ubiquinol-cytochrome C reductase complex 14 kDa protein, putative                                                                                  |
| AT5G05370 |         | mitochondrial electron transport / ATP synthesis.cytochrome c reductase            | ubiquinol-cytochrome C reductase complex ubiquinone-binding protein, putative / ubiquinol-cytochrome C reductase complex 8.2 kDa protein, putative |
| AT5G13430 |         | mitochondrial electron transport / ATP synthesis.cytochrome c reductase            | ubiquinol-cytochrome C reductase iron-sulfur subunit, mitochondrial, putative / Rieske iron-sulfur protein, putative                               |
| AT3G52730 |         | mitochondrial electron transport / ATP synthesis.cytochrome c reductase            | ubiquinol-cytochrome C reductase UQCRX/QCR9-like family protein                                                                                    |
| AT3G11930 |         | hormone metabolism.ethylene.induced-regulated-responsive-activated                 | universal stress protein (USP) family protein                                                                                                      |
| AT5G62865 |         | not assigned.unknown                                                               | unknown protein                                                                                                                                    |
| AT1G30130 |         | not assigned.unknown                                                               | unknown protein                                                                                                                                    |
| AT1G04280 |         | not assigned.unknown                                                               | unknown protein                                                                                                                                    |
| AT1G33800 |         | not assigned.unknown                                                               | unknown protein                                                                                                                                    |
| AT1G33810 |         | not assigned.unknown                                                               | unknown protein                                                                                                                                    |
| AT1G36050 |         | not assigned.unknown                                                               | unknown protein                                                                                                                                    |
| AT1G47550 | SEC3A   | not assigned.unknown                                                               | unknown protein                                                                                                                                    |
| AT1G48200 |         | not assigned.unknown                                                               | unknown protein                                                                                                                                    |
| AT1G51630 |         | not assigned.unknown                                                               | unknown protein                                                                                                                                    |
| AT1G52200 |         | not assigned.no ontology                                                           | unknown protein                                                                                                                                    |

|           |      |                          |                 |
|-----------|------|--------------------------|-----------------|
| AT1G52320 | SDH6 | not assigned.unknown     | unknown protein |
| AT1G52780 |      | not assigned.unknown     | unknown protein |
| AT1G53760 |      | not assigned.unknown     | unknown protein |
| AT1G55160 |      | not assigned.unknown     | unknown protein |
| AT1G57610 |      | not assigned.unknown     | unknown protein |
| AT1G65270 |      | not assigned.unknown     | unknown protein |
| AT1G65985 |      | not assigned.unknown     | unknown protein |
| AT1G67350 |      | not assigned.no ontology | unknown protein |
| AT1G67785 |      | not assigned.unknown     | unknown protein |
| AT1G08480 |      | not assigned.unknown     | unknown protein |
| AT1G72170 |      | not assigned.unknown     | unknown protein |
| AT1G09330 |      | not assigned.unknown     | unknown protein |
| AT1G80890 |      | not assigned.unknown     | unknown protein |
| AT1G18720 |      | not assigned.no ontology | unknown protein |
| AT1G20430 |      | not assigned.unknown     | unknown protein |
| AT1G22200 |      | not assigned.unknown     | unknown protein |
| AT1G22520 |      | not assigned.unknown     | unknown protein |
| AT1G24310 |      | not assigned.unknown     | unknown protein |
| AT1G27930 |      | not assigned.unknown     | unknown protein |
| AT2G28430 |      | not assigned.unknown     | unknown protein |
| AT2G31490 |      | not assigned.unknown     | unknown protein |
| AT2G35736 |      | not assigned.unknown     | unknown protein |
| AT2G35790 |      | not assigned.unknown     | unknown protein |
| AT2G38550 |      | not assigned.unknown     | unknown protein |
| AT2G40765 |      | not assigned.unknown     | unknown protein |
| AT2G42310 |      | not assigned.unknown     | unknown protein |

|           |      |                                                                  |                 |
|-----------|------|------------------------------------------------------------------|-----------------|
| AT2G44870 | MGP1 | not assigned.unknown                                             | unknown protein |
| AT2G45010 |      | not assigned.no ontology                                         | unknown protein |
| AT2G46540 |      | not assigned.unknown                                             | unknown protein |
| AT2G47960 |      | not assigned.unknown                                             | unknown protein |
| AT2G02510 |      | not assigned.unknown                                             | unknown protein |
| AT2G20820 |      | not assigned.unknown                                             | unknown protein |
| AT2G21870 |      | not assigned.unknown                                             | unknown protein |
| AT3G27390 |      | not assigned.unknown                                             | unknown protein |
| AT3G27930 |      | not assigned.unknown                                             | unknown protein |
| AT3G28720 |      | RNA.regulation of transcription.putative transcription regulator | unknown protein |
| AT3G43520 | SDH7 | not assigned.unknown                                             | unknown protein |
| AT3G47833 |      | not assigned.unknown                                             | unknown protein |
| AT3G49720 |      | not assigned.unknown                                             | unknown protein |
| AT3G51580 |      | not assigned.unknown                                             | unknown protein |
| AT3G57280 |      | not assigned.unknown                                             | unknown protein |
| AT3G62010 |      | protein.postranslational modification                            | unknown protein |
| AT3G07568 |      | not assigned.unknown                                             | unknown protein |
| AT3G08600 |      | not assigned.unknown                                             | unknown protein |
| AT3G08610 |      | not assigned.unknown                                             | unknown protein |
| AT3G01720 |      | not assigned.unknown                                             | unknown protein |
| AT3G10980 |      | stress                                                           | unknown protein |
| AT3G01130 |      | not assigned.unknown                                             | unknown protein |
| AT3G02900 |      | not assigned.unknown                                             | unknown protein |
| AT3G21190 |      | not assigned.unknown                                             | unknown protein |
| AT4G20150 |      | not assigned.unknown                                             | unknown protein |

|           |          |                          |                 |
|-----------|----------|--------------------------|-----------------|
| AT4G22310 |          | not assigned.unknown     | unknown protein |
| AT4G24330 |          | not assigned.unknown     | unknown protein |
| AT4G25770 |          | not assigned.unknown     | unknown protein |
| AT4G27120 |          | not assigned.unknown     | unknown protein |
| AT4G30010 |          | not assigned.unknown     | unknown protein |
| AT4G39690 |          | not assigned.unknown     | unknown protein |
| AT4G00530 |          | not assigned.unknown     | unknown protein |
| AT4G00585 |          | not assigned.unknown     | unknown protein |
| AT4G12590 |          | not assigned.unknown     | unknown protein |
| AT4G16450 |          | not assigned.unknown     | unknown protein |
| AT5G35460 |          | not assigned.unknown     | unknown protein |
| AT5G04830 |          | not assigned.unknown     | unknown protein |
| AT5G42960 |          | not assigned.unknown     | unknown protein |
| AT5G45480 |          | not assigned.unknown     | unknown protein |
| AT5G47570 |          | not assigned.unknown     | unknown protein |
| AT5G51510 |          | not assigned.unknown     | unknown protein |
| AT5G53650 |          | not assigned.unknown     | unknown protein |
| AT5G54440 | AtTRS130 | not assigned.unknown     | unknown protein |
| AT5G55610 |          | not assigned.unknown     | unknown protein |
| AT5G59613 |          | not assigned.unknown     | unknown protein |
| AT5G62575 | SDH7     | not assigned.unknown     | unknown protein |
| AT5G08060 |          | not assigned.no ontology | unknown protein |
| AT5G65207 |          | not assigned.unknown     | unknown protein |
| AT5G65810 | CGR3     | not assigned.unknown     | unknown protein |
| AT5G65950 |          | not assigned.unknown     | unknown protein |
| AT5G08540 |          | not assigned.unknown     | unknown protein |

|           |          |                                                                        |                                                                                                                                                         |
|-----------|----------|------------------------------------------------------------------------|---------------------------------------------------------------------------------------------------------------------------------------------------------|
| AT5G09270 | UKL2     | not assigned.unknown                                                   | unknown protein                                                                                                                                         |
| AT5G09995 |          | not assigned.unknown                                                   | unknown protein                                                                                                                                         |
| AT5G12470 |          | not assigned.unknown                                                   | unknown protein                                                                                                                                         |
| AT5G13560 |          | not assigned.no ontology                                               | unknown protein                                                                                                                                         |
| AT5G15320 |          | not assigned.unknown                                                   | unknown protein                                                                                                                                         |
| AT5G16280 |          | not assigned.unknown                                                   | unknown protein                                                                                                                                         |
| AT5G16660 |          | not assigned.unknown                                                   | unknown protein                                                                                                                                         |
| AT5G20090 |          | not assigned.unknown                                                   | unknown protein                                                                                                                                         |
| AT5G25265 |          | not assigned.unknown                                                   | unknown protein                                                                                                                                         |
| AT3G27190 |          | nucleotide metabolism.salvage.phosphoribosyltransferases.upp           | uracil phosphoribosyltransferase, putative / UMP pyrophosphorylase, putative / UPRTase, putative                                                        |
| AT1G76030 | BP80-3;1 | transport.p- and v-ATPases.H+-transporting two-sector ATPase.subunit B | vacuolar ATP synthase subunit B / V-ATPase B subunit / vacuolar proton pump B subunit / V-ATPase 57 kDa subunit                                         |
| AT4G38510 |          | transport.p- and v-ATPases.H+-transporting two-sector ATPase.subunit B | vacuolar ATP synthase subunit B, putative / V-ATPase B subunit, putative / vacuolar proton pump B subunit, putative / V-ATPase 57 kDa subunit, putative |
| AT3G58730 |          | transport.p- and v-ATPases.H+-transporting two-sector ATPase.subunit D | vacuolar ATP synthase subunit D (VATD) / V-ATPase D subunit / vacuolar proton pump D subunit (VATPD)                                                    |
| AT3G42050 |          | transport.p- and v-ATPases.H+-transporting two-sector ATPase.subunit H | vacuolar ATP synthase subunit H family protein                                                                                                          |
| AT4G20110 |          | protein.targeting.secretory pathway.vacuole                            | vacuolar sorting receptor, putative                                                                                                                     |
| AT4G21450 |          | cell.vesicle transport                                                 | vesicle-associated membrane family protein / VAMP family protein                                                                                        |
| AT4G00170 |          | not assigned.no ontology                                               | vesicle-associated membrane family protein / VAMP family protein                                                                                        |
| AT5G47180 |          | cell.vesicle transport                                                 | vesicle-associated membrane family protein / VAMP family protein                                                                                        |
| AT5G50650 |          | not assigned.no ontology                                               | WD-40 repeat family protein / St12p protein, putative                                                                                                   |
| AT1G68070 |          | protein.degradation.ubiquitin.E3.RING                                  | zinc finger (C3HC4-type RING finger) family protein                                                                                                     |
